# Supplementary material
Source: MDPI journal article supplement (https://www.mdpi.com/1424-2818/15/2/270)
Supplement: s1 [file s1]

**Table S1.** Original data of habitat preferences in Hymenophyllaceae from c. 160 sources. Given are valid species name following [27], the species name used in each reference, the reference itself, and % preference for, respectively, epiphytic (EV), lithophytic (LV) and terrestrial growth (TV).

| Valid species name                   | Species name in source               | Reference | EV (%) | LV (%) | TV (%) |
|--------------------------------------|--------------------------------------|-----------|--------|--------|--------|
| <i>Abrodictyum angustimarginatum</i> | <i>Trichomanes angustimarginatum</i> | [20]      | 0      | 0      | 100    |
| <i>Abrodictyum angustimarginatum</i> | <i>Abrodictyum angustimarginatum</i> | [56]      | 0      | 0      | 100    |
| <i>Abrodictyum asae-grayi</i>        | <i>Trichomanes asa-grayi</i>         | [57]      | 0      | 0      | 100    |
| <i>Abrodictyum asae-grayi</i>        | <i>Trichomanes asa-grayi</i>         | [20]      | 0      | 0      | 100    |
| <i>Abrodictyum asae-grayi</i>        | <i>Trichomanes asa-grayi</i>         | [39]      | 50     | 0      | 50     |
| <i>Abrodictyum boninense</i>         | <i>Abrodictyum boninense</i>         | [58]      | 100    | 0      | 0      |
| <i>Abrodictyum caespifrons</i>       | <i>Trichomanes caespifrons</i>       | [57]      | 0      | 0      | 100    |
| <i>Abrodictyum caudatum</i>          | <i>Trichomanes caudatum</i>          | [57]      | 100    | 0      | 0      |
| <i>Abrodictyum caudatum</i>          | <i>Trichomanes caudatum</i>          | [20]      | 0      | 0      | 100    |
| <i>Abrodictyum caudatum</i>          | <i>Abrodictyum caudatum</i>          | [59]      | 100    | 0      | 0      |
| <i>Abrodictyum caudatum</i>          | <i>Abrodictyum caudatum</i>          | [60]      | 100    | 0      | 0      |
| <i>Abrodictyum cellulosum</i>        | <i>Trichomanes cellulosum</i>        | [20]      | 0      | 0      | 100    |
| <i>Abrodictyum cellulosum</i>        | <i>Abrodictyum cellulosum</i>        | [36]      | 33.3   | 33.3   | 33.4   |
| <i>Abrodictyum cellulosum</i>        | <i>Trichomanes cellulosum</i>        | [36]      | 33.3   | 33.3   | 33.4   |
| <i>Abrodictyum cellulosum</i>        | <i>Trichomanes cellulosum</i>        | [29]      | 100    | 0      | 0      |
| <i>Abrodictyum clathratum</i>        | <i>Abrodictyum clathratum</i>        | [61]      | 50     | 0      | 50     |
| <i>Abrodictyum cumingii</i>          | <i>Abrodictyum cumingii</i>          | [62]      | 100    | 0      | 0      |
| <i>Abrodictyum cumingii</i>          | <i>Trichomanes cumingii</i>          | [63]      | 100    | 0      | 0      |
| <i>Abrodictyum cumingii</i>          | <i>Trichomanes cumingii</i>          | [20]      | 100    | 0      | 0      |
| <i>Abrodictyum cumingii</i>          | <i>Abrodictyum cumingii</i>          | [58]      | 100    | 0      | 0      |
| <i>Abrodictyum cumingii</i>          | <i>Abrodictyum cumingii</i>          | [61]      | 100    | 0      | 0      |
| <i>Abrodictyum dentatum</i>          | <i>Trichomanes dentatum</i>          | [57]      | 0      | 0      | 100    |
| <i>Abrodictyum dentatum</i>          | <i>Trichomanes longicollum</i>       | [20]      | 0      | 0      | 100    |
| <i>Abrodictyum dentatum</i>          | <i>Trichomanes dentatum</i>          | [20]      | 0      | 0      | 100    |
| <i>Abrodictyum dentatum</i>          | <i>Trichomanes dentatum</i>          | [64]      | 0      | 0      | 100    |
| <i>Abrodictyum dentatum</i>          | <i>Abrodictyum dentatum</i>          | [60]      | 0      | 0      | 100    |
| <i>Abrodictyum dregei</i>            | <i>Selenodesmium rigidium</i>        | [65]      | 0      | 50     | 50     |
| <i>Abrodictyum dregei</i>            | <i>Abrodictyum dregei</i>            | [66]      | 0      | 50     | 50     |
| <i>Abrodictyum dregei</i>            | <i>Abrodictyum dregei</i>            | [67]      | 0      | 50     | 50     |
| <i>Abrodictyum elongatum</i>         | <i>Trichomanes elongatum</i>         | [68]      | 0      | 100    | 0      |
| <i>Abrodictyum elongatum</i>         | <i>Trichomanes elongatum</i>         | [20]      | 0      | 0      | 100    |
| <i>Abrodictyum extravagans</i>       | <i>Trichomanes extravagans</i>       | [20]      | 0      | 0      | 100    |
| <i>Abrodictyum flavofuscum</i>       | <i>Trichomanes flavo-fuscum</i>      | [20]      | 50     | 0      | 50     |
| <i>Abrodictyum flavofuscum</i>       | <i>Trichomanes flavo-fuscum</i>      | [69]      | 100    | 0      | 0      |
| <i>Abrodictyum francae</i>           | <i>Abrodictyum francae</i>           | [70]      | 0      | 0      | 100    |
| <i>Abrodictyum guineense</i>         | <i>Trichomanes guineense</i>         | [71]      | 0      | 0      | 100    |
| <i>Abrodictyum guineense</i>         | <i>Trichomanes guineense</i>         | [20]      | 0      | 0      | 100    |
| <i>Abrodictyum guineense</i>         | <i>Trichomanes batrachoglossum</i>   | [20]      | 0      | 0      | 100    |
| <i>Abrodictyum guineense</i>         | <i>Trichomanes guineense</i>         | [72]      | 0      | 0      | 100    |
| <i>Abrodictyum guineense</i>         | <i>Trichomanes guineense</i>         | [73]      | 0      | 0      | 100    |
| <i>Abrodictyum idoneum</i>           | <i>Trichomanes gemmatum</i>          | [20]      | 0      | 0      | 100    |
| <i>Abrodictyum idoneum</i>           | <i>Abrodictyum idoneum</i>           | [74]      | 0      | 0      | 100    |
| <i>Abrodictyum idoneum</i>           | <i>Cephalomanes gemmatum</i>         | [75]      | 100    | 0      | 0      |
| <i>Abrodictyum idoneum</i>           | <i>Trichomanes idoneum</i>           | [76]      | 0      | 0      | 100    |
| <i>Abrodictyum laetum</i>            | <i>Trichomanes laetum</i>            | [20]      | 0      | 0      | 100    |
| <i>Abrodictyum obscurum</i>          | <i>Abrodictyum obscurum</i>          | [77]      | 0      | 100    | 0      |
| <i>Abrodictyum obscurum</i>          | <i>Trichomanes obscurum</i>          | [28]      | 0      | 0      | 100    |

| Valid species name               | Species name in source           | Reference | EV (%) | LV (%) | TV (%) |
|----------------------------------|----------------------------------|-----------|--------|--------|--------|
| <i>Abrodictyum obscurum</i>      | <i>Trichomanes tereticaulum</i>  | [20]      | 0      | 0      | 100    |
| <i>Abrodictyum obscurum</i>      | <i>Abrodictyum obscurum</i>      | [20]      | 0      | 0      | 100    |
| <i>Abrodictyum obscurum</i>      | <i>Abrodictyum obscurum</i>      | [78]      | 0      | 33.3   | 66.7   |
| <i>Abrodictyum obscurum</i>      | <i>Abrodictyum obscurum</i>      | [79]      | 0      | 50     | 50     |
| <i>Abrodictyum obscurum</i>      | <i>Abrodictyum obscurum</i>      | [61]      | 0      | 100    | 0      |
| <i>Abrodictyum obscurum</i>      | <i>Abrodictyum obscurum</i>      | [80]      | 0      | 0      | 100    |
| <i>Abrodictyum obscurum</i>      | <i>Abrodictyum obscurum</i>      | [81]      | 0      | 67     | 33     |
| <i>Abrodictyum obscurum</i>      | <i>Abrodictyum obscurum</i>      | [75]      | 0      | 0      | 100    |
| <i>Abrodictyum obscurum</i>      | <i>Trichomanes obscurum</i>      | [76]      | 0      | 0      | 100    |
| <i>Abrodictyum pachyphlebium</i> | <i>Trichomanes pachyphlebium</i> | [20]      | 0      | 0      | 100    |
| <i>Abrodictyum parviflorum</i>   | <i>Trichomanes meifolium</i>     | [20]      | 0      | 0      | 100    |
| <i>Abrodictyum parviflorum</i>   | <i>Trichomanes parviflorum</i>   | [20]      | 0      | 0      | 100    |
| <i>Abrodictyum parviflorum</i>   | <i>Abrodictyum parviflorum</i>   | [75]      | 50     | 0      | 50     |
| <i>Abrodictyum parviflorum</i>   | <i>Trichomanes meifolium</i>     | [76]      | 33     | 0      | 67     |
| <i>Abrodictyum pseudorigidum</i> | <i>Abrodictyum pseudorigidum</i> | [70]      | 0      | 0      | 100    |
| <i>Abrodictyum pseudorigidum</i> | <i>Abrodictyum pseudorigidum</i> | [82]      | 0      | 50     | 50     |
| <i>Abrodictyum rigidum</i>       | <i>Abrodictyum rigidum</i>       | [83]      | 0      | 50     | 50     |
| <i>Abrodictyum rigidum</i>       | <i>Abrodictyum rigidum</i>       | [71]      | 5      | 95     | 0      |
| <i>Abrodictyum rigidum</i>       | <i>Abrodictyum rigidum</i>       | [84]      | 50     | 0      | 50     |
| <i>Abrodictyum rigidum</i>       | <i>Abrodictyum rigidum</i>       | [22]      | 0      | 0      | 100    |
| <i>Abrodictyum rigidum</i>       | <i>Abrodictyum rigidum</i>       | [85]      | 50     | 50     | 0      |
| <i>Abrodictyum rigidum</i>       | <i>Abrodictyum rigidum</i>       | [86]      | 0      | 0      | 100    |
| <i>Abrodictyum rigidum</i>       | <i>Abrodictyum rigidum</i>       | [18]      | 0      | 0      | 100    |
| <i>Abrodictyum rigidum</i>       | <i>Abrodictyum rigidum</i>       | [87]      | 0      | 0      | 100    |
| <i>Abrodictyum rigidum</i>       | <i>Abrodictyum rigidum</i>       | [20]      | 0      | 0      | 100    |
| <i>Abrodictyum rigidum</i>       | <i>Abrodictyum rigidum</i>       | [44]      | 5      | 0      | 95     |
| <i>Abrodictyum rigidum</i>       | <i>Abrodictyum rigidum</i>       | [88]      | 0      | 0      | 100    |
| <i>Abrodictyum rigidum</i>       | <i>Abrodictyum rigidum</i>       | [89]      | 0      | 0      | 100    |
| <i>Abrodictyum rigidum</i>       | <i>Abrodictyum rigidum</i>       | [90]      | 0      | 0      | 100    |
| <i>Abrodictyum rigidum</i>       | <i>Abrodictyum rigidum</i>       | [91]      | 100    | 0      | 0      |
| <i>Abrodictyum rigidum</i>       | <i>Abrodictyum rigidum</i>       | [36]      | 33.3   | 33.3   | 33.4   |
| <i>Abrodictyum rigidum</i>       | <i>Abrodictyum rigidum</i>       | [36]      | 33.3   | 33.3   | 33.4   |
| <i>Abrodictyum rigidum</i>       | <i>Abrodictyum rigidum</i>       | [92]      | 0      | 50     | 50     |
| <i>Abrodictyum rigidum</i>       | <i>Abrodictyum rigidum</i>       | [43]      | 47.5   | 47.5   | 5      |
| <i>Abrodictyum rigidum</i>       | <i>Abrodictyum rigidum</i>       | [93]      | 0      | 0      | 100    |
| <i>Abrodictyum rigidum</i>       | <i>Abrodictyum rigidum</i>       | [94]      | 0      | 0      | 100    |
| <i>Abrodictyum rigidum</i>       | <i>Abrodictyum rigidum</i>       | [29]      | 0      | 0      | 100    |
| <i>Abrodictyum rigidum</i>       | <i>Abrodictyum rigidum</i>       | [95]      | 0      | 0      | 100    |
| <i>Abrodictyum rigidum</i>       | <i>Abrodictyum rigidum</i>       | [96]      | 0      | 0      | 100    |
| <i>Abrodictyum rigidum</i>       | <i>Abrodictyum rigidum</i>       | [97]      | 0      | 50     | 50     |
| <i>Abrodictyum rigidum</i>       | <i>Abrodictyum rigidum</i>       | [98]      | 0      | 0      | 100    |
| <i>Abrodictyum rigidum</i>       | <i>Abrodictyum rigidum</i>       | [73]      | 0      | 0      | 100    |
| <i>Abrodictyum rigidum</i>       | <i>Abrodictyum rigidum</i>       | [99]      | 0      | 50     | 50     |
| <i>Abrodictyum rigidum</i>       | <i>Selenodesmium rigidum</i>     | [100]     | 0      | 0      | 100    |
| <i>Abrodictyum rigidum</i>       | <i>Abrodictyum rigidum</i>       | [101]     | 0      | 50     | 50     |
| <i>Abrodictyum rigidum</i>       | <i>Trichomanes rigidum</i>       | [102]     | 0      | 100    | 0      |
| <i>Abrodictyum rigidum</i>       | <i>Trichomanes rigidum</i>       | [103]     | 0      | 0      | 100    |
| <i>Abrodictyum rigidum</i>       | <i>Trichomanes rigidum</i>       | [104]     | 0      | 0      | 100    |
| <i>Abrodictyum rigidum</i>       | <i>Trichomanes rigidum</i>       | [105]     | 0      | 0      | 100    |
| <i>Abrodictyum schlechteri</i>   | <i>Abrodictyum schlechteri</i>   | [62]      | 100    | 0      | 0      |
| <i>Abrodictyum schlechteri</i>   | <i>Trichomanes compactum</i>     | [20]      | 0      | 0      | 100    |

| Valid species name                | Species name in source            | Reference | EV (%) | LV (%) | TV (%) |
|-----------------------------------|-----------------------------------|-----------|--------|--------|--------|
| <i>Abrodictyum schlechteri</i>    | <i>Trichomanes schlechteri</i>    | [20]      | 0      | 0      | 100    |
| <i>Abrodictyum schlechteri</i>    | <i>Abrodictyum schlechteri</i>    | [74]      | 50     | 50     | 0      |
| <i>Abrodictyum setaceum</i>       | <i>Trichomanes setaceum</i>       | [20]      | 0      | 0      | 100    |
| <i>Abrodictyum setaceum</i>       | <i>Abrodictyum setaceum</i>       | [80]      | 0      | 0      | 100    |
| <i>Abrodictyum sprucei</i>        | <i>Abrodictyum sprucei</i>        | [22]      | 33.3   | 33.3   | 33.4   |
| <i>Abrodictyum sprucei</i>        | <i>Trichomanes sprucei</i>        | [18]      | 0      | 0      | 100    |
| <i>Abrodictyum sprucei</i>        | <i>Abrodictyum sprucei</i>        | [36]      | 33.3   | 33.3   | 33.4   |
| <i>Abrodictyum sprucei</i>        | <i>Trichomanes sprucei</i>        | [36]      | 33.4   | 33.3   | 33.3   |
| <i>Abrodictyum sprucei</i>        | <i>Trichomanes sprucei</i>        | [94]      | 0      | 0      | 100    |
| <i>Abrodictyum sprucei</i>        | <i>Trichomanes sprucei</i>        | [99]      | 0      | 15     | 85     |
| <i>Abrodictyum strictum</i>       | <i>Trichomanes strictum</i>       | [68]      | 0      | 0      | 100    |
| <i>Abrodictyum strictum</i>       | <i>Trichomanes strictum</i>       | [20]      | 0      | 0      | 100    |
| <i>Abrodictyum strictum</i>       | <i>Abrodictyum strictum</i>       | [106]     | 0      | 0      | 100    |
| <i>Abrodictyum tamarisciforme</i> | <i>Trichomanes tamarisciforme</i> | [20]      | 50     | 0      | 50     |
| <i>Abrodictyum windischianum</i>  | <i>Trichomanes windischianum</i>  | [36]      | 0      | 0      | 100    |
| <i>Abrodictyum windischianum</i>  | <i>Trichomanes windischianum</i>  | [107]     | 0      | 50     | 50     |
| <i>Abrodictyum windischianum</i>  | <i>Trichomanes windischianum</i>  | [29]      | 0      | 100    | 0      |
| <i>Callistopteris apiifolia</i>   | <i>Trichomanes apiifolium</i>     | [57]      | 0      | 0      | 100    |
| <i>Callistopteris apiifolia</i>   | <i>Trichomanes apiifolium</i>     | [20]      | 0      | 0      | 100    |
| <i>Callistopteris apiifolia</i>   | <i>Callistopteris apiifolia</i>   | [58]      | 0      | 0      | 100    |
| <i>Callistopteris apiifolia</i>   | <i>Callistopteris apiifolia</i>   | [78]      | 0      | 0      | 100    |
| <i>Callistopteris apiifolia</i>   | <i>Callistopteris apiifolia</i>   | [79]      | 0      | 100    | 0      |
| <i>Callistopteris apiifolia</i>   | <i>Callistopteris apiifolia</i>   | [61]      | 15     | 0      | 85     |
| <i>Callistopteris apiifolia</i>   | <i>Callistopteris apiifolia</i>   | [108]     | 0      | 0      | 100    |
| <i>Callistopteris apiifolia</i>   | <i>Callistopteris apiifolia</i>   | [60]      | 0      | 0      | 100    |
| <i>Callistopteris apiifolia</i>   | <i>Callistopteris apiifolia</i>   | [109]     | 0      | 0      | 100    |
| <i>Callistopteris baldwinii</i>   | <i>Trichomanes baldwinii</i>      | [20]      | 0      | 0      | 100    |
| <i>Callistopteris baldwinii</i>   | <i>Callistopteris baldwinii</i>   | [110]     | 0      | 0      | 100    |
| <i>Callistopteris polyantha</i>   | <i>Trichomanes societense</i>     | [64]      | 0      | 0      | 100    |
| <i>Callistopteris superba</i>     | <i>Cephalomanes superbum</i>      | [75]      | 0      | 0      | 100    |
| <i>Cephalomanes atrovirens</i>    | <i>Trichomanes boryanum</i>       | [57]      | 0      | 0      | 100    |
| <i>Cephalomanes atrovirens</i>    | <i>Trichomanes kingii</i>         | [20]      | 0      | 0      | 100    |
| <i>Cephalomanes atrovirens</i>    | <i>Trichomanes acrosorum</i>      | [20]      | 0      | 0      | 100    |
| <i>Cephalomanes atrovirens</i>    | <i>Trichomanes boryanum</i>       | [20]      | 0      | 0      | 100    |
| <i>Cephalomanes atrovirens</i>    | <i>Trichomanes atrovirens</i>     | [20]      | 0      | 0      | 100    |
| <i>Cephalomanes atrovirens</i>    | <i>Cephalomanes boryanum</i>      | [109]     | 0      | 0      | 100    |
| <i>Cephalomanes crassum</i>       | <i>Trichomanes crassum</i>        | [20]      | 0      | 0      | 100    |
| <i>Cephalomanes densinervium</i>  | <i>Trichomanes densinervium</i>   | [20]      | 0      | 0      | 100    |
| <i>Cephalomanes javanicum</i>     | <i>Crepidomanes javanicum</i>     | [111]     | 0      | 0      | 100    |
| <i>Cephalomanes javanicum</i>     | <i>Cephalomanes javanicum</i>     | [77]      | 0      | 100    | 0      |
| <i>Cephalomanes javanicum</i>     | <i>Trichomanes javanicum</i>      | [28]      | 60     | 20     | 20     |
| <i>Cephalomanes javanicum</i>     | <i>Trichomanes javanicum</i>      | [20]      | 0      | 0      | 100    |
| <i>Cephalomanes javanicum</i>     | <i>Trichomanes sumatranum</i>     | [20]      | 0      | 0      | 100    |
| <i>Cephalomanes javanicum</i>     | <i>Cephalomanes javanicum</i>     | [79]      | 0      | 50     | 50     |
| <i>Cephalomanes javanicum</i>     | <i>Crepidomanes javanicum</i>     | [61]      | 0      | 50     | 50     |
| <i>Cephalomanes javanicum</i>     | <i>Cephalomanes javanicum</i>     | [108]     | 50     | 50     | 0      |
| <i>Cephalomanes javanicum</i>     | <i>Cephalomanes javanicum</i>     | [80]      | 0      | 0      | 100    |
| <i>Cephalomanes javanicum</i>     | <i>Trichomanes javanicum</i>      | [76]      | 0      | 0      | 100    |
| <i>Cephalomanes singaporianum</i> | <i>Cephalomanes singaporianum</i> | [20]      | 0      | 0      | 100    |
| <i>Cephalomanes singaporianum</i> | <i>Cephalomanes singaporianum</i> | [80]      | 0      | 0      | 100    |
| <i>Cephalomanes singaporianum</i> | <i>Cephalomanes singaporianum</i> | [75]      | 0      | 50     | 50     |

| Valid species name               | Species name in source           | Reference | EV (%) | LV (%) | TV (%) |
|----------------------------------|----------------------------------|-----------|--------|--------|--------|
| <i>Crepidomanes africanum</i>    | <i>Trichomanes africanum</i>     | [71]      | 95     | 5      | 0      |
| <i>Crepidomanes africanum</i>    | <i>Trichomanes africanum</i>     | [20]      | 100    | 0      | 0      |
| <i>Crepidomanes africanum</i>    | <i>Trichomanes africanum</i>     | [72]      | 85     | 0      | 15     |
| <i>Crepidomanes africanum</i>    | <i>Trichomanes africanum</i>     | [73]      | 95     | 0      | 5      |
| <i>Crepidomanes aphlebioides</i> | <i>Trichomanes aphlebioides</i>  | [57]      | 50     | 50     | 0      |
| <i>Crepidomanes aphlebioides</i> | <i>Trichomanes aphlebioides</i>  | [20]      | 100    | 0      | 0      |
| <i>Crepidomanes aphlebioides</i> | <i>Crepidomanes aphlebioides</i> | [59]      | 100    | 0      | 0      |
| <i>Crepidomanes aphlebioides</i> | <i>Crepidomanes aphlebioides</i> | [108]     | 50     | 50     | 0      |
| <i>Crepidomanes aphlebioides</i> | <i>Crepidomanes aphlebioides</i> | [75]      | 0      | 100    | 0      |
| <i>Crepidomanes assimilis</i>    | <i>Trichomanes assimile</i>      | [20]      | 100    | 0      | 0      |
| <i>Crepidomanes bilabiatum</i>   | <i>Crepidomanes bilabiatum</i>   | [58]      | 0      | 100    | 0      |
| <i>Crepidomanes bilabiatum</i>   | <i>Crepidomanes bilabiatum</i>   | [108]     | 50     | 50     | 0      |
| <i>Crepidomanes bilabiatum</i>   | <i>Trichomanes bilabiatum</i>    | [76]      | 50     | 50     | 0      |
| <i>Crepidomanes bipunctatum</i>  | <i>Trichomanes bipunctatum</i>   | [28]      | 0      | 100    | 0      |
| <i>Crepidomanes bipunctatum</i>  | <i>Trichomanes bipunctatum</i>   | [57]      | 50     | 50     | 0      |
| <i>Crepidomanes bipunctatum</i>  | <i>Crepidomanes bipunctatum</i>  | [112]     | 50     | 50     | 0      |
| <i>Crepidomanes bipunctatum</i>  | <i>Crepidomanes bipunctatum</i>  | [62]      | 100    | 0      | 0      |
| <i>Crepidomanes bipunctatum</i>  | <i>Trichomanes bipunctatum</i>   | [20]      | 100    | 0      | 0      |
| <i>Crepidomanes bipunctatum</i>  | <i>Trichomanes venulosum</i>     | [20]      | 100    | 0      | 0      |
| <i>Crepidomanes bipunctatum</i>  | <i>Crepidomanes bipunctatum</i>  | [113]     | 100    | 0      | 0      |
| <i>Crepidomanes bipunctatum</i>  | <i>Crepidomanes bipunctatum</i>  | [79]      | 50     | 50     | 0      |
| <i>Crepidomanes bipunctatum</i>  | <i>Crepidomanes bipunctatum</i>  | [64]      | 33     | 67     | 0      |
| <i>Crepidomanes bipunctatum</i>  | <i>Crepidomanes bipunctatum</i>  | [60]      | 34     | 66     | 0      |
| <i>Crepidomanes bipunctatum</i>  | <i>Crepidomanes bipunctatum</i>  | [80]      | 85     | 15     | 0      |
| <i>Crepidomanes bipunctatum</i>  | <i>Crepidomanes bipunctatum</i>  | [82]      | 67     | 33     | 0      |
| <i>Crepidomanes bipunctatum</i>  | <i>Crepidomanes bipunctatum</i>  | [75]      | 100    | 0      | 0      |
| <i>Crepidomanes bipunctatum</i>  | <i>Crepidomanes bipunctatum</i>  | [114]     | 50     | 50     | 0      |
| <i>Crepidomanes bipunctatum</i>  | <i>Trichomanes bipunctatum</i>   | [76]      | 50     | 50     | 0      |
| <i>Crepidomanes bonapartei</i>   | <i>Crepidomanes bonapartei</i>   | [113]     | 85     | 15     | 0      |
| <i>Crepidomanes brevipes</i>     | <i>Crepidomanes brevipes</i>     | [111]     | 0      | 50     | 50     |
| <i>Crepidomanes brevipes</i>     | <i>Crepidomanes brevipes</i>     | [62]      | 100    | 0      | 0      |
| <i>Crepidomanes brevipes</i>     | <i>Trichomanes brevipes</i>      | [20]      | 100    | 0      | 0      |
| <i>Crepidomanes brevipes</i>     | <i>Crepidomanes brevipes</i>     | [78]      | 50     | 50     | 0      |
| <i>Crepidomanes brevipes</i>     | <i>Crepidomanes brevipes</i>     | [79]      | 0      | 100    | 0      |
| <i>Crepidomanes campanulatum</i> | <i>Crepidomanes campanulatum</i> | [81]      | 50     | 50     | 0      |
| <i>Crepidomanes campanulatum</i> | <i>Crepidomanes campanulatum</i> | [53]      | 100    | 0      | 0      |
| <i>Crepidomanes chevalieri</i>   | <i>Crepidomanes chevalieri</i>   | [83]      | 85     | 15     | 0      |
| <i>Crepidomanes chevalieri</i>   | <i>Trichomanes chevalieri</i>    | [71]      | 85     | 15     | 0      |
| <i>Crepidomanes chevalieri</i>   | <i>Trichomanes chevalieri</i>    | [115]     | 100    | 0      | 0      |
| <i>Crepidomanes chevalieri</i>   | <i>Trichomanes chevalieri</i>    | [20]      | 100    | 0      | 0      |
| <i>Crepidomanes chevalieri</i>   | <i>Crepidomanes chevalieri</i>   | [116]     | 50     | 50     | 0      |
| <i>Crepidomanes chevalieri</i>   | <i>Crepidomanes chevalieri</i>   | [116]     | 50     | 50     | 0      |
| <i>Crepidomanes chevalieri</i>   | <i>Trichomanes chevalieri</i>    | [72]      | 100    | 0      | 0      |
| <i>Crepidomanes chevalieri</i>   | <i>Trichomanes chevalieri</i>    | [73]      | 95     | 0      | 5      |
| <i>Crepidomanes chevalieri</i>   | <i>Trichomanes chevalieri</i>    | [100]     | 33     | 67     | 0      |
| <i>Crepidomanes christii</i>     | <i>Crepidomanes christii</i>     | [77]      | 0      | 100    | 0      |
| <i>Crepidomanes christii</i>     | <i>Trichomanes christii</i>      | [20]      | 100    | 0      | 0      |
| <i>Crepidomanes christii</i>     | <i>Crepidomanes christii</i>     | [79]      | 100    | 0      | 0      |
| <i>Crepidomanes christii</i>     | <i>Crepidomanes christii</i>     | [80]      | 85     | 15     | 0      |
| <i>Crepidomanes christii</i>     | <i>Crepidomanes christii</i>     | [75]      | 100    | 0      | 0      |
| <i>Crepidomanes christii</i>     | <i>Trichomanes christii</i>      | [76]      | 50     | 50     | 0      |

| Valid species name                 | Species name in source             | Reference | EV (%) | LV (%) | TV (%) |
|------------------------------------|------------------------------------|-----------|--------|--------|--------|
| <i>Crepidomanes clarenceanum</i>   | <i>Trichomanes clarenceanum</i>    | [71]      | 85     | 15     | 0      |
| <i>Crepidomanes clarenceanum</i>   | <i>Trichomanes clarenceanum</i>    | [20]      | 100    | 0      | 0      |
| <i>Crepidomanes clarenceanum</i>   | <i>Trichomanes clarenceanum</i>    | [72]      | 0      | 100    | 0      |
| <i>Crepidomanes clarenceanum</i>   | <i>Crepidomanes clarenceanum</i>   | [56]      | 100    | 0      | 0      |
| <i>Crepidomanes clarenceanum</i>   | <i>Trichomanes clarenceanum</i>    | [73]      | 100    | 0      | 0      |
| <i>Crepidomanes draytonianum</i>   | <i>Trichomanes draytonianum</i>    | [20]      | 100    | 0      | 0      |
| <i>Crepidomanes draytonianum</i>   | <i>Crepidomanes draytonianum</i>   | [110]     | 0      | 85     | 15     |
| <i>Crepidomanes fallax</i>         | <i>Crepidomanes fallax</i>         | [83]      | 50     | 50     | 0      |
| <i>Crepidomanes fallax</i>         | <i>Trichomanes fallax</i>          | [71]      | 50     | 50     | 0      |
| <i>Crepidomanes fallax</i>         | <i>Trichomanes fallax</i>          | [20]      | 100    | 0      | 0      |
| <i>Crepidomanes fallax</i>         | <i>Crepidomanes fallax</i>         | [113]     | 50     | 50     | 0      |
| <i>Crepidomanes fallax</i>         | <i>Vandenboschia fallax</i>        | [65]      | 100    | 0      | 0      |
| <i>Crepidomanes fallax</i>         | <i>Trichomanes fallax</i>          | [73]      | 95     | 0      | 5      |
| <i>Crepidomanes frappieri</i>      | <i>Trichomanes frappieri</i>       | [20]      | 100    | 0      | 0      |
| <i>Crepidomanes frappieri</i>      | <i>Crepidomanes frappieri</i>      | [113]     | 50     | 50     | 0      |
| <i>Crepidomanes frappieri</i>      | <i>Crepidomanes frappieri</i>      | [92]      | 0      | 100    | 0      |
| <i>Crepidomanes frappieri</i>      | <i>Crepidomanes frappieri</i>      | [66]      | 100    | 0      | 0      |
| <i>Crepidomanes grande</i>         | <i>Trichomanes grande</i>          | [20]      | 0      | 0      | 100    |
| <i>Crepidomanes grande</i>         | <i>Crepidomanes grande</i>         | [80]      | 0      | 100    | 0      |
| <i>Crepidomanes humile</i>         | <i>Crepidomanes humile</i>         | [111]     | 0      | 0      | 100    |
| <i>Crepidomanes humile</i>         | <i>Trichomanes humile</i>          | [57]      | 50     | 50     | 0      |
| <i>Crepidomanes humile</i>         | <i>Crepidomanes humile</i>         | [62]      | 100    | 0      | 0      |
| <i>Crepidomanes humile</i>         | <i>Trichomanes gracillimum</i>     | [20]      | 100    | 0      | 0      |
| <i>Crepidomanes humile</i>         | <i>Trichomanes humile</i>          | [20]      | 100    | 0      | 0      |
| <i>Crepidomanes humile</i>         | <i>Crepidomanes humile</i>         | [117]     | 50     | 50     | 0      |
| <i>Crepidomanes humile</i>         | <i>Crepidomanes humile</i>         | [118]     | 100    | 0      | 0      |
| <i>Crepidomanes humile</i>         | <i>Crepidomanes humile</i>         | [79]      | 0      | 100    | 0      |
| <i>Crepidomanes humile</i>         | <i>Crepidomanes humile</i>         | [61]      | 0      | 100    | 0      |
| <i>Crepidomanes humile</i>         | <i>Crepidomanes humile</i>         | [108]     | 50     | 50     | 0      |
| <i>Crepidomanes humile</i>         | <i>Trichomanes humile</i>          | [64]      | 50     | 50     | 0      |
| <i>Crepidomanes humile</i>         | <i>Crepidomanes humile</i>         | [60]      | 50     | 50     | 0      |
| <i>Crepidomanes humile</i>         | <i>Crepidomanes humile</i>         | [80]      | 100    | 0      | 0      |
| <i>Crepidomanes humile</i>         | <i>Crepidomanes humile</i>         | [75]      | 100    | 0      | 0      |
| <i>Crepidomanes humile</i>         | <i>Trichomanes humile</i>          | [76]      | 85     | 15     | 0      |
| <i>Crepidomanes humile</i>         | <i>Reediella humilis</i>           | [109]     | 100    | 0      | 0      |
| <i>Crepidomanes inopinatum</i>     | <i>Trichomanes inopinatum</i>      | [20]      | 100    | 0      | 0      |
| <i>Crepidomanes inopinatum</i>     | <i>Crepidomanes inopinatum</i>     | [113]     | 50     | 50     | 0      |
| <i>Crepidomanes inopinatum</i>     | <i>Crepidomanes inopinatum</i>     | [92]      | 50     | 50     | 0      |
| <i>Crepidomanes inopinatum</i>     | <i>Crepidomanes inopinatum</i>     | [93]      | 99     | 1      | 0      |
| <i>Crepidomanes inopinatum</i>     | <i>Vandenboschia inopinata</i>     | [65]      | 95     | 5      | 0      |
| <i>Crepidomanes inopinatum</i>     | <i>Crepidomanes inopinatum</i>     | [66]      | 50     | 50     | 0      |
| <i>Crepidomanes inopinatum</i>     | <i>Crepidomanes inopinatum</i>     | [67]      | 50     | 50     | 0      |
| <i>Crepidomanes inopinatum</i>     | <i>Crepidomanes inopinatum</i>     | [56]      | 75     | 25     | 0      |
| <i>Crepidomanes inopinatum</i>     | <i>Crepidomanes inopinatum</i>     | [82]      | 50     | 50     | 0      |
| <i>Crepidomanes intermedium</i>    | <i>Trichomanes intermedium</i>     | [57]      | 0      | 0      | 100    |
| <i>Crepidomanes intermedium</i>    | <i>Crepidomanes intermedium</i>    | [62]      | 100    | 0      | 0      |
| <i>Crepidomanes intermedium</i>    | <i>Trichomanes intermedium</i>     | [20]      | 0      | 0      | 100    |
| <i>Crepidomanes intramarginale</i> | <i>Trichomanes latemarginale</i>   | [20]      | 100    | 0      | 0      |
| <i>Crepidomanes intramarginale</i> | <i>Crepidomanes intramarginale</i> | [20]      | 100    | 0      | 0      |
| <i>Crepidomanes intramarginale</i> | <i>Crepidomanes intramarginale</i> | [119]     | 100    | 0      | 0      |
| <i>Crepidomanes intramarginale</i> | <i>Crepidomanes agasthianum</i>    | [120]     | 100    | 0      | 0      |

| Valid species name                | Species name in source            | Reference | EV (%) | LV (%) | TV (%) |
|-----------------------------------|-----------------------------------|-----------|--------|--------|--------|
| <i>Crepidomanes intricatum</i>    | <i>Crepidomanes intricatum</i>    | [121]     | 0      | 100    | 0      |
| <i>Crepidomanes intricatum</i>    | <i>Crepidomanes intricatum</i>    | [122]     | 0      | 100    | 0      |
| <i>Crepidomanes kurzii</i>        | <i>Crepidomanes kurzii</i>        | [62]      | 100    | 0      | 0      |
| <i>Crepidomanes kurzii</i>        | <i>Trichomanes nymanii</i>        | [20]      | 100    | 0      | 0      |
| <i>Crepidomanes kurzii</i>        | <i>Crepidomanes kurzii</i>        | [79]      | 0      | 100    | 0      |
| <i>Crepidomanes kurzii</i>        | <i>Crepidomanes kurzii</i>        | [61]      | 0      | 100    | 0      |
| <i>Crepidomanes kurzii</i>        | <i>Crepidomanes kurzii</i>        | [81]      | 100    | 0      | 0      |
| <i>Crepidomanes latealatum</i>    | <i>Trichomanes latealatum</i>     | [20]      | 100    | 0      | 0      |
| <i>Crepidomanes latealatum</i>    | <i>Crepidomanes latealatum</i>    | [78]      | 100    | 0      | 0      |
| <i>Crepidomanes latealatum</i>    | <i>Crepidomanes latealatum</i>    | [79]      | 50     | 50     | 0      |
| <i>Crepidomanes latealatum</i>    | <i>Crepidomanes latealatum</i>    | [61]      | 50     | 50     | 0      |
| <i>Crepidomanes latealatum</i>    | <i>Crepidomanes latealatum</i>    | [123]     | 50     | 50     | 0      |
| <i>Crepidomanes latealatum</i>    | <i>Crepidomanes latealatum</i>    | [75]      | 50     | 50     | 0      |
| <i>Crepidomanes latealatum</i>    | <i>Crepidomanes latealatum</i>    | [53]      | 34     | 33     | 33     |
| <i>Crepidomanes latemarginale</i> | <i>Crepidomanes latemarginale</i> | [79]      | 0      | 100    | 0      |
| <i>Crepidomanes latemarginale</i> | <i>Crepidomanes latemarginale</i> | [61]      | 0      | 100    | 0      |
| <i>Crepidomanes makinoi</i>       | <i>Crepidomanes makinoi</i>       | [124]     | 100    | 0      | 0      |
| <i>Crepidomanes makinoi</i>       | <i>Trichomanes makinoi</i>        | [20]      | 100    | 0      | 0      |
| <i>Crepidomanes megistostomum</i> | <i>Trichomanes megistostomum</i>  | [20]      | 100    | 0      | 0      |
| <i>Crepidomanes megistostomum</i> | <i>Crepidomanes megistostomum</i> | [114]     | 0      | 100    | 0      |
| <i>Crepidomanes melanotrichum</i> | <i>Crepidomanes melanotrichum</i> | [83]      | 50     | 50     | 0      |
| <i>Crepidomanes melanotrichum</i> | <i>Trichomanes melanotrichum</i>  | [115]     | 100    | 0      | 0      |
| <i>Crepidomanes melanotrichum</i> | <i>Trichomanes melanotrichum</i>  | [20]      | 100    | 0      | 0      |
| <i>Crepidomanes melanotrichum</i> | <i>Crepidomanes melanotrichum</i> | [113]     | 50     | 50     | 0      |
| <i>Crepidomanes melanotrichum</i> | <i>Crepidomanes melanotrichum</i> | [116]     | 50     | 50     | 0      |
| <i>Crepidomanes melanotrichum</i> | <i>Crepidomanes melanotrichum</i> | [116]     | 50     | 50     | 0      |
| <i>Crepidomanes melanotrichum</i> | <i>Crepidomanes melanotrichum</i> | [125]     | 50     | 50     | 0      |
| <i>Crepidomanes melanotrichum</i> | <i>Crepidomanes melanotrichum</i> | [92]      | 50     | 50     | 0      |
| <i>Crepidomanes melanotrichum</i> | <i>Vandenboschia melanotricha</i> | [65]      | 100    | 0      | 0      |
| <i>Crepidomanes melanotrichum</i> | <i>Crepidomanes melanotrichum</i> | [66]      | 50     | 50     | 0      |
| <i>Crepidomanes melanotrichum</i> | <i>Crepidomanes melanotrichum</i> | [67]      | 50     | 50     | 0      |
| <i>Crepidomanes melanotrichum</i> | <i>Trichomanes melanotrichum</i>  | [73]      | 0      | 100    | 0      |
| <i>Crepidomanes melanotrichum</i> | <i>Trichomanes melanotrichum</i>  | [100]     | 85     | 15     | 0      |
| <i>Crepidomanes mettenii</i>      | <i>Trichomanes mettenii</i>       | [71]      | 50     | 50     | 0      |
| <i>Crepidomanes mettenii</i>      | <i>Trichomanes mettenii</i>       | [20]      | 100    | 0      | 0      |
| <i>Crepidomanes mettenii</i>      | <i>Trichomanes mettenii</i>       | [72]      | 100    | 0      | 0      |
| <i>Crepidomanes mettenii</i>      | <i>Trichomanes mettenii</i>       | [73]      | 50     | 50     | 0      |
| <i>Crepidomanes minutum</i>       | <i>Crepidomanes minutum</i>       | [62]      | 100    | 0      | 0      |
| <i>Crepidomanes minutum</i>       | <i>Trichomanes minutum</i>        | [20]      | 100    | 0      | 0      |
| <i>Crepidomanes minutum</i>       | <i>Crepidomanes minutum</i>       | [113]     | 85     | 15     | 0      |
| <i>Crepidomanes minutum</i>       | <i>Crepidomanes minutum</i>       | [117]     | 50     | 50     | 0      |
| <i>Crepidomanes minutum</i>       | <i>Crepidomanes minutum</i>       | [78]      | 100    | 0      | 0      |
| <i>Crepidomanes minutum</i>       | <i>Crepidomanes minutum</i>       | [79]      | 50     | 50     | 0      |
| <i>Crepidomanes minutum</i>       | <i>Crepidomanes minutum</i>       | [61]      | 50     | 50     | 0      |
| <i>Crepidomanes minutum</i>       | <i>Crepidomanes minutum</i>       | [80]      | 66     | 17     | 17     |
| <i>Crepidomanes minutum</i>       | <i>Crepidomanes minutum</i>       | [126]     | 100    | 0      | 0      |
| <i>Crepidomanes minutum</i>       | <i>Crepidomanes minutum</i>       | [82]      | 100    | 0      | 0      |
| <i>Crepidomanes minutum</i>       | <i>Crepidomanes minutum</i>       | [75]      | 50     | 50     | 0      |
| <i>Crepidomanes minutum</i>       | <i>Crepidomanes minutum</i>       | [114]     | 0      | 100    | 0      |
| <i>Crepidomanes minutum</i>       | <i>Crepidomanes minutum</i>       | [53]      | 0      | 100    | 0      |
| <i>Crepidomanes parvifolium</i>   | <i>Trichomanes pervenulosum</i>   | [20]      | 100    | 0      | 0      |

| Valid species name                | Species name in source             | Reference | EV (%) | LV (%) | TV (%) |
|-----------------------------------|------------------------------------|-----------|--------|--------|--------|
| <i>Crepidomanes parvifolium</i>   | <i>Crepidomanes parvifolium</i>    | [61]      | 0      | 100    | 0      |
| <i>Crepidomanes parvifolium</i>   | <i>Crepidomanes parvifolium</i>    | [114]     | 0      | 100    | 0      |
| <i>Crepidomanes parvulum</i>      | <i>Crepidomanes mannii</i>         | [83]      | 47.5   | 47.5   | 5      |
| <i>Crepidomanes parvulum</i>      | <i>Trichomanes proliferum</i>      | [28]      | 100    | 0      | 0      |
| <i>Crepidomanes parvulum</i>      | <i>Trichomanes mannii</i>          | [20]      | 100    | 0      | 0      |
| <i>Crepidomanes parvulum</i>      | <i>Trichomanes alagense</i>        | [20]      | 100    | 0      | 0      |
| <i>Crepidomanes parvulum</i>      | <i>Crepidomanes mannii</i>         | [113]     | 85     | 15     | 0      |
| <i>Crepidomanes parvulum</i>      | <i>Crepidomanes parvulum</i>       | [110]     | 50     | 50     | 0      |
| <i>Crepidomanes parvulum</i>      | <i>Crepidomanes parvulum</i>       | [39]      | 50     | 50     | 0      |
| <i>Crepidomanes parvulum</i>      | <i>Crepidomanes parvulum</i>       | [72]      | 100    | 0      | 0      |
| <i>Crepidomanes parvulum</i>      | <i>Crepidomanes parvulum</i>       | [93]      | 99     | 1      | 0      |
| <i>Crepidomanes parvulum</i>      | <i>Crepidomanes parvulum</i>       | [60]      | 100    | 0      | 0      |
| <i>Crepidomanes parvulum</i>      | <i>Gonocormus mannii</i>           | [65]      | 100    | 0      | 0      |
| <i>Crepidomanes parvulum</i>      | <i>Crepidomanes parvulum</i>       | [66]      | 50     | 50     | 0      |
| <i>Crepidomanes parvulum</i>      | <i>Crepidomanes mannii</i>         | [56]      | 100    | 0      | 0      |
| <i>Crepidomanes parvulum</i>      | <i>Trichomanes proliferum</i>      | [81]      | 50     | 50     | 0      |
| <i>Crepidomanes parvulum</i>      | <i>Trichomanes mannii</i>          | [73]      | 95     | 0      | 5      |
| <i>Crepidomanes parvulum</i>      | <i>Trichomanes proliferum</i>      | [76]      | 50     | 50     | 0      |
| <i>Crepidomanes parvulum</i>      | <i>Gonocormus mannii</i>           | [100]     | 67     | 33     | 0      |
| <i>Crepidomanes ramitrichum</i>   | <i>Crepidomanes ramitrichum</i>    | [83]      | 50     | 50     | 0      |
| <i>Crepidomanes ramitrichum</i>   | <i>Crepidomanes ramitrichum</i>    | [127]     | 85     | 15     | 0      |
| <i>Crepidomanes ramitrichum</i>   | <i>Crepidomanes ramitrichum</i>    | [116]     | 50     | 50     | 0      |
| <i>Crepidomanes ramitrichum</i>   | <i>Crepidomanes ramitrichum</i>    | [116]     | 50     | 50     | 0      |
| <i>Crepidomanes ramitrichum</i>   | <i>Crepidomanes ramitrichum</i>    | [93]      | 100    | 0      | 0      |
| <i>Crepidomanes ramitrichum</i>   | <i>Crepidomanes ramitrichum</i>    | [93]      | 100    | 0      | 0      |
| <i>Crepidomanes ramitrichum</i>   | <i>Vandenboschia ramitricha</i>    | [65]      | 100    | 0      | 0      |
| <i>Crepidomanes ramitrichum</i>   | <i>Trichomanes ramitrichum</i>     | [100]     | 85     | 15     | 0      |
| <i>Crepidomanes rothertii</i>     | <i>Trichomanes rothertii</i>       | [20]      | 100    | 0      | 0      |
| <i>Crepidomanes rupicola</i>      | <i>Crepidomanes rupicola</i>       | [20]      | 100    | 0      | 0      |
| <i>Crepidomanes rupicola</i>      | <i>Crepidomanes rupicola</i>       | [61]      | 5      | 95     | 0      |
| <i>Crepidomanes rupicola</i>      | <i>Trichomanes rupicola</i>        | [128]     | 0      | 100    | 0      |
| <i>Crepidomanes ruwenzoriense</i> | <i>Trichomanes ruwenzoriense</i>   | [20]      | 100    | 0      | 0      |
| <i>Crepidomanes ruwenzoriense</i> | <i>Crepidomanes ruwenzoriense</i>  | [56]      | 100    | 0      | 0      |
| <i>Crepidomanes saxifragoides</i> | <i>Trichomanes saxifragoides</i>   | [57]      | 100    | 0      | 0      |
| <i>Crepidomanes saxifragoides</i> | <i>Crepidomanes saxifragoides</i>  | [20]      | 100    | 0      | 0      |
| <i>Crepidomanes saxifragoides</i> | <i>Crepidomanes saxifragoides</i>  | [117]     | 50     | 50     | 0      |
| <i>Crepidomanes saxifragoides</i> | <i>Crepidomanes saxifragoides</i>  | [129]     | 50     | 50     | 0      |
| <i>Crepidomanes saxifragoides</i> | <i>Crepidomanes saxifragoides</i>  | [60]      | 0      | 100    | 0      |
| <i>Crepidomanes saxifragoides</i> | <i>Didymoglossum saxifragoides</i> | [81]      | 0      | 100    | 0      |
| <i>Crepidomanes saxifragoides</i> | <i>Trichomanes saxifragoides</i>   | [76]      | 50     | 50     | 0      |
| <i>Crepidomanes schmidianum</i>   | <i>Trichomanes schmidtianum</i>    | [20]      | 100    | 0      | 0      |
| <i>Crepidomanes schmidianum</i>   | <i>Trichomanes latifrons</i>       | [20]      | 100    | 0      | 0      |
| <i>Crepidomanes schmidianum</i>   | <i>Crepidomanes schmidianum</i>    | [130]     | 50     | 50     | 0      |
| <i>Crepidomanes schmidianum</i>   | <i>Crepidomanes schmidianum</i>    | [61]      | 50     | 50     | 0      |
| <i>Crepidomanes schmidianum</i>   | <i>Trichomanes schmidianum</i>     | [131]     | 50     | 50     | 0      |
| <i>Crepidomanes teysmannii</i>    | <i>Trichomanes teysmannii</i>      | [20]      | 100    | 0      | 0      |
| <i>Crepidomanes thysanostomum</i> | <i>Crepidomanes thysanostomum</i>  | [111]     | 0      | 50     | 50     |
| <i>Crepidomanes thysanostomum</i> | <i>Trichomanes thysanostomum</i>   | [20]      | 0      | 0      | 100    |
| <i>Crepidomanes thysanostomum</i> | <i>Trichomanes blepharistomum</i>  | [20]      | 0      | 0      | 100    |
| <i>Crepidomanes thysanostomum</i> | <i>Crepidomanes thysanostomum</i>  | [61]      | 0      | 100    | 0      |
| <i>Crepidomanes trinerve</i>      | <i>Crepidomanes trinerve</i>       | [83]      | 47.5   | 47.5   | 5      |

| Valid species name                | Species name in source            | Reference | EV (%) | LV (%) | TV (%) |
|-----------------------------------|-----------------------------------|-----------|--------|--------|--------|
| <i>Crepidomanes trinerve</i>      | <i>Crepidomanes trinerve</i>      | [71]      | 50     | 50     | 0      |
| <i>Crepidomanes trinerve</i>      | <i>Crepidomanes trinerve</i>      | [115]     | 100    | 0      | 0      |
| <i>Crepidomanes trinerve</i>      | <i>Crepidomanes trinerve</i>      | [113]     | 50     | 50     | 0      |
| <i>Crepidomanes trinerve</i>      | <i>Crepidomanes trinerve</i>      | [93]      | 99     | 1      | 0      |
| <i>Crepidomanes trinerve</i>      | <i>Crepidomanes trinerve</i>      | [82]      | 33     | 67     | 0      |
| <i>Crepidomanes vitiense</i>      | <i>Trichomanes vitiense</i>       | [57]      | 50     | 0      | 50     |
| <i>Crepidomanes vitiense</i>      | <i>Crepidomanes vitiense</i>      | [62]      | 100    | 0      | 0      |
| <i>Crepidomanes vitiense</i>      | <i>Crepidomanes vitiense</i>      | [117]     | 100    | 0      | 0      |
| <i>Crepidomanes vitiense</i>      | <i>Crepidomanes vitiense</i>      | [61]      | 5      | 95     | 0      |
| <i>Didymoglossum angustifrons</i> | <i>Didymoglossum angustifrons</i> | [22]      | 50     | 50     | 0      |
| <i>Didymoglossum angustifrons</i> | <i>Didymoglossum angustifrons</i> | [86]      | 50     | 50     | 0      |
| <i>Didymoglossum angustifrons</i> | <i>Trichomanes angustifrons</i>   | [18]      | 50     | 0      | 50     |
| <i>Didymoglossum angustifrons</i> | <i>Didymoglossum angustifrons</i> | [132]     | 100    | 0      | 0      |
| <i>Didymoglossum angustifrons</i> | <i>Trichomanes angustifrons</i>   | [20]      | 100    | 0      | 0      |
| <i>Didymoglossum angustifrons</i> | <i>Didymoglossum angustifrons</i> | [44]      | 100    | 0      | 0      |
| <i>Didymoglossum angustifrons</i> | <i>Didymoglossum angustifrons</i> | [88]      | 100    | 0      | 0      |
| <i>Didymoglossum angustifrons</i> | <i>Didymoglossum angustifrons</i> | [90]      | 100    | 0      | 0      |
| <i>Didymoglossum angustifrons</i> | <i>Didymoglossum angustifrons</i> | [36]      | 50     | 50     | 0      |
| <i>Didymoglossum angustifrons</i> | <i>Trichomanes angustifrons</i>   | [36]      | 50     | 50     | 0      |
| <i>Didymoglossum angustifrons</i> | <i>Trichomanes angustifrons</i>   | [94]      | 50     | 50     | 0      |
| <i>Didymoglossum angustifrons</i> | <i>Trichomanes angustifrons</i>   | [29]      | 100    | 0      | 0      |
| <i>Didymoglossum angustifrons</i> | <i>Didymoglossum angustifrons</i> | [133]     | 100    | 0      | 0      |
| <i>Didymoglossum angustifrons</i> | <i>Trichomanes angustifrons</i>   | [95]      | 100    | 0      | 0      |
| <i>Didymoglossum angustifrons</i> | <i>Didymoglossum angustifrons</i> | [96]      | 100    | 0      | 0      |
| <i>Didymoglossum angustifrons</i> | <i>Trichomanes angustifrons</i>   | [99]      | 0      | 100    | 0      |
| <i>Didymoglossum angustifrons</i> | <i>Trichomanes angustifrons</i>   | [134]     | 100    | 0      | 0      |
| <i>Didymoglossum ballardianum</i> | <i>Trichomanes ballardianum</i>   | [20]      | 100    | 0      | 0      |
| <i>Didymoglossum ballardianum</i> | <i>Microgonium ballardianum</i>   | [135]     | 50     | 50     | 0      |
| <i>Didymoglossum ballardianum</i> | <i>Microgonium ballardianum</i>   | [135]     | 33.3   | 33.3   | 33.4   |
| <i>Didymoglossum ballardianum</i> | <i>Trichomanes ballardianum</i>   | [73]      | 95     | 0      | 5      |
| <i>Didymoglossum ballardianum</i> | <i>Didymoglossum ballardianum</i> | [223]     | 100    | 0      | 0      |
| <i>Didymoglossum beaverianum</i>  | <i>Didymoglossum beaverianum</i>  | [136]     | 0      | 100    | 0      |
| <i>Didymoglossum beccarianum</i>  | <i>Didymoglossum beccarianum</i>  | [62]      | 100    | 0      | 0      |
| <i>Didymoglossum beccarianum</i>  | <i>Didymoglossum beccarianum</i>  | [136]     | 100    | 0      | 0      |
| <i>Didymoglossum benlii</i>       | <i>Microgonium benlii</i>         | [135]     | 0      | 100    | 0      |
| <i>Didymoglossum benlii</i>       | <i>Microgonium benlii</i>         | [135]     | 0      | 100    | 0      |
| <i>Didymoglossum berterianum</i>  | <i>Trichomanes hookeri</i>        | [134]     | 50     | 50     | 0      |
| <i>Didymoglossum bimarginatum</i> | <i>Trichomanes bimarginatum</i>   | [77]      | 0      | 100    | 0      |
| <i>Didymoglossum bimarginatum</i> | <i>Trichomanes bimarginatum</i>   | [57]      | 50     | 0      | 50     |
| <i>Didymoglossum bimarginatum</i> | <i>Didymoglossum bimarginatum</i> | [62]      | 100    | 0      | 0      |
| <i>Didymoglossum bimarginatum</i> | <i>Microgonium bimarginatum</i>   | [137]     | 50     | 50     | 0      |
| <i>Didymoglossum bimarginatum</i> | <i>Didymoglossum bimarginatum</i> | [137]     | 50     | 50     | 0      |
| <i>Didymoglossum bimarginatum</i> | <i>Trichomanes bimarginatum</i>   | [20]      | 100    | 0      | 0      |
| <i>Didymoglossum bimarginatum</i> | <i>Didymoglossum bimarginatum</i> | [117]     | 50     | 50     | 0      |
| <i>Didymoglossum bimarginatum</i> | <i>Didymoglossum bimarginatum</i> | [79]      | 0      | 100    | 0      |
| <i>Didymoglossum bimarginatum</i> | <i>Didymoglossum bimarginatum</i> | [61]      | 50     | 50     | 0      |
| <i>Didymoglossum bimarginatum</i> | <i>Didymoglossum bimarginatum</i> | [81]      | 50     | 50     | 0      |
| <i>Didymoglossum bimarginatum</i> | <i>Trichomanes bimarginatum</i>   | [75]      | 100    | 0      | 0      |
| <i>Didymoglossum bucinatum</i>    | <i>Trichomanes bucinatum</i>      | [138]     | 50     | 50     | 0      |
| <i>Didymoglossum caluffii</i>     | <i>Trichomanes caluffii</i>       | [139]     | 100    | 0      | 0      |
| <i>Didymoglossum chamaedrys</i>   | <i>Trichomanes chamaedrys</i>     | [20]      | 100    | 0      | 0      |



| Valid species name              | Species name in source          | Reference | EV (%) | LV (%) | TV (%) |
|---------------------------------|---------------------------------|-----------|--------|--------|--------|
| <i>Didymoglossum chamaedrys</i> | <i>Trichomanes chamaedrys</i>   | [72]      | 50     | 50     | 0      |
| <i>Didymoglossum chamaedrys</i> | <i>Microgonium chamaedrys</i>   | [135]     | 50     | 50     | 0      |
| <i>Didymoglossum chamaedrys</i> | <i>Microgonium chamaedrys</i>   | [135]     | 50     | 50     | 0      |
| <i>Didymoglossum chamaedrys</i> | <i>Microgonium chamaedrys</i>   | [100]     | 67     | 33     | 0      |
| <i>Didymoglossum cultratum</i>  | <i>Trichomanes cultratum</i>    | [57]      | 100    | 0      | 0      |
| <i>Didymoglossum cultratum</i>  | <i>Didymoglossum cultratum</i>  | [137]     | 85     | 15     | 0      |
| <i>Didymoglossum cultratum</i>  | <i>Trichomanes cultratum</i>    | [20]      | 100    | 0      | 0      |
| <i>Didymoglossum cultratum</i>  | <i>Didymoglossum cultratum</i>  | [136]     | 100    | 0      | 0      |
| <i>Didymoglossum curtii</i>     | <i>Trichomanes curtii</i>       | [18]      | 100    | 0      | 0      |
| <i>Didymoglossum curtii</i>     | <i>Trichomanes curtii</i>       | [20]      | 100    | 0      | 0      |
| <i>Didymoglossum curtii</i>     | <i>Didymoglossum curtii</i>     | [44]      | 100    | 0      | 0      |
| <i>Didymoglossum curtii</i>     | <i>Didymoglossum curtii</i>     | [90]      | 100    | 0      | 0      |
| <i>Didymoglossum curtii</i>     | <i>Trichomanes curtii</i>       | [94]      | 100    | 0      | 0      |
| <i>Didymoglossum curtii</i>     | <i>Trichomanes curtii</i>       | [134]     | 50     | 50     | 0      |
| <i>Didymoglossum cuspidatum</i> | <i>Didymoglossum cuspidatum</i> | [112]     | 50     | 50     | 0      |
| <i>Didymoglossum cuspidatum</i> | <i>Didymoglossum cuspidatum</i> | [20]      | 100    | 0      | 0      |
| <i>Didymoglossum cuspidatum</i> | <i>Didymoglossum cuspidatum</i> | [56]      | 50     | 50     | 0      |
| <i>Didymoglossum ekmanii</i>    | <i>Didymoglossum ekmanii</i>    | [22]      | 50     | 50     | 0      |
| <i>Didymoglossum ekmanii</i>    | <i>Trichomanes ekmanii</i>      | [18]      | 100    | 0      | 0      |
| <i>Didymoglossum ekmanii</i>    | <i>Didymoglossum ekmanii</i>    | [140]     | 100    | 0      | 0      |
| <i>Didymoglossum ekmanii</i>    | <i>Trichomanes ekmanii</i>      | [20]      | 100    | 0      | 0      |
| <i>Didymoglossum ekmanii</i>    | <i>Didymoglossum ekmanii</i>    | [44]      | 100    | 0      | 0      |
| <i>Didymoglossum ekmanii</i>    | <i>Didymoglossum ekmanii</i>    | [90]      | 50     | 50     | 0      |
| <i>Didymoglossum ekmanii</i>    | <i>Trichomanes ekmanii</i>      | [94]      | 100    | 0      | 0      |
| <i>Didymoglossum ekmanii</i>    | <i>Didymoglossum ekmanii</i>    | [96]      | 100    | 0      | 0      |
| <i>Didymoglossum ekmanii</i>    | <i>Trichomanes ekmanii</i>      | [134]     | 100    | 0      | 0      |
| <i>Didymoglossum erosum</i>     | <i>Didymoglossum erosum</i>     | [83]      | 33.3   | 33.3   | 33.4   |
| <i>Didymoglossum erosum</i>     | <i>Trichomanes erosum</i>       | [71]      | 50     | 50     | 0      |
| <i>Didymoglossum erosum</i>     | <i>Didymoglossum erosum</i>     | [141]     | 100    | 0      | 0      |
| <i>Didymoglossum erosum</i>     | <i>Trichomanes erosum</i>       | [20]      | 100    | 0      | 0      |
| <i>Didymoglossum erosum</i>     | <i>Trichomanes erosum</i>       | [72]      | 50     | 50     | 0      |
| <i>Didymoglossum erosum</i>     | <i>Didymoglossum erosum</i>     | [92]      | 50     | 50     | 0      |
| <i>Didymoglossum erosum</i>     | <i>Microgonium erosum</i>       | [135]     | 50     | 50     | 0      |
| <i>Didymoglossum erosum</i>     | <i>Microgonium erosum</i>       | [135]     | 50     | 50     | 0      |
| <i>Didymoglossum erosum</i>     | <i>Microgonium erosum</i>       | [65]      | 50     | 0      | 50     |
| <i>Didymoglossum erosum</i>     | <i>Didymoglossum erosum</i>     | [66]      | 50     | 50     | 0      |
| <i>Didymoglossum erosum</i>     | <i>Didymoglossum erosum</i>     | [56]      | 100    | 0      | 0      |
| <i>Didymoglossum erosum</i>     | <i>Didymoglossum erosum</i>     | [82]      | 100    | 0      | 0      |
| <i>Didymoglossum erosum</i>     | <i>Trichomanes erosum</i>       | [73]      | 100    | 0      | 0      |
| <i>Didymoglossum erosum</i>     | <i>Microgonium erosum</i>       | [100]     | 55     | 45     | 0      |
| <i>Didymoglossum exiguum</i>    | <i>Trichomanes exiguum</i>      | [20]      | 100    | 0      | 0      |
| <i>Didymoglossum exiguum</i>    | <i>Didymoglossum exiguum</i>    | [79]      | 0      | 100    | 0      |
| <i>Didymoglossum exiguum</i>    | <i>Trichomanes exiguum</i>      | [75]      | 0      | 100    | 0      |
| <i>Didymoglossum fulgens</i>    | <i>Didymoglossum fulgens</i>    | [142]     | 50     | 50     | 0      |
| <i>Didymoglossum godmanii</i>   | <i>Didymoglossum godmanii</i>   | [143]     | 100    | 0      | 0      |
| <i>Didymoglossum godmanii</i>   | <i>Trichomanes godmanii</i>     | [18]      | 100    | 0      | 0      |
| <i>Didymoglossum godmanii</i>   | <i>Didymoglossum godmanii</i>   | [140]     | 100    | 0      | 0      |
| <i>Didymoglossum godmanii</i>   | <i>Trichomanes godmanii</i>     | [20]      | 100    | 0      | 0      |
| <i>Didymoglossum godmanii</i>   | <i>Didymoglossum godmanii</i>   | [44]      | 100    | 0      | 0      |
| <i>Didymoglossum godmanii</i>   | <i>Didymoglossum godmanii</i>   | [90]      | 100    | 0      | 0      |
| <i>Didymoglossum godmanii</i>   | <i>Trichomanes godmanii</i>     | [94]      | 100    | 0      | 0      |

| Valid species name                 | Species name in source             | Reference | EV (%) | LV (%) | TV (%) |
|------------------------------------|------------------------------------|-----------|--------|--------|--------|
| <i>Didymoglossum godmanii</i>      | <i>Trichomanes godmanii</i>        | [134]     | 100    | 0      | 0      |
| <i>Didymoglossum gourlianum</i>    | <i>Trichomanes gourlianum</i>      | [18]      | 100    | 0      | 0      |
| <i>Didymoglossum gourlianum</i>    | <i>Trichomanes gourlianum</i>      | [20]      | 100    | 0      | 0      |
| <i>Didymoglossum gourlianum</i>    | <i>Trichomanes gourlianum</i>      | [134]     | 100    | 0      | 0      |
| <i>Didymoglossum henzaianum</i>    | <i>Trichomanes henzaianum</i>      | [20]      | 100    | 0      | 0      |
| <i>Didymoglossum henzaianum</i>    | <i>Trichomanes vamana</i>          | [144]     | 100    | 0      | 0      |
| <i>Didymoglossum henzaianum</i>    | <i>Didymoglossum henzaianum</i>    | [75]      | 0      | 0      | 100    |
| <i>Didymoglossum hildebrandtii</i> | <i>Trichomanes hildebrandtii</i>   | [20]      | 100    | 0      | 0      |
| <i>Didymoglossum hildebrandtii</i> | <i>Didymoglossum hildebrandtii</i> | [56]      | 100    | 0      | 0      |
| <i>Didymoglossum hildebrandtii</i> | <i>Didymoglossum hildebrandtii</i> | [82]      | 100    | 0      | 0      |
| <i>Didymoglossum hymenoides</i>    | <i>Didymoglossum hymenoides</i>    | [145]     | 100    | 0      | 0      |
| <i>Didymoglossum hymenoides</i>    | <i>Didymoglossum hymenoides</i>    | [146]     | 50     | 50     | 0      |
| <i>Didymoglossum hymenoides</i>    | <i>Didymoglossum hymenoides</i>    | [84]      | 85     | 0      | 15     |
| <i>Didymoglossum hymenoides</i>    | <i>Didymoglossum hymenoides</i>    | [22]      | 33.3   | 33.3   | 33.4   |
| <i>Didymoglossum hymenoides</i>    | <i>Didymoglossum hymenoides</i>    | [86]      | 100    | 0      | 0      |
| <i>Didymoglossum hymenoides</i>    | <i>Trichomanes hymenoides</i>      | [18]      | 50     | 0      | 50     |
| <i>Didymoglossum hymenoides</i>    | <i>Trichomanes hymenoides</i>      | [20]      | 100    | 0      | 0      |
| <i>Didymoglossum hymenoides</i>    | <i>Didymoglossum hymenoides</i>    | [44]      | 100    | 0      | 0      |
| <i>Didymoglossum hymenoides</i>    | <i>Didymoglossum hymenoides</i>    | [36]      | 50     | 50     | 0      |
| <i>Didymoglossum hymenoides</i>    | <i>Trichomanes hymenoides</i>      | [36]      | 50     | 50     | 0      |
| <i>Didymoglossum hymenoides</i>    | <i>Didymoglossum hymenoides</i>    | [43]      | 95     | 2.5    | 2.5    |
| <i>Didymoglossum hymenoides</i>    | <i>Trichomanes hymenoides</i>      | [94]      | 50     | 50     | 0      |
| <i>Didymoglossum hymenoides</i>    | <i>Didymoglossum hymenoides</i>    | [97]      | 100    | 0      | 0      |
| <i>Didymoglossum hymenoides</i>    | <i>Trichomanes hymenoides</i>      | [26]      | 100    | 0      | 0      |
| <i>Didymoglossum hymenoides</i>    | <i>Didymoglossum hymenoides</i>    | [26]      | 100    | 0      | 0      |
| <i>Didymoglossum hymenoides</i>    | <i>Trichomanes hymenoides</i>      | [99]      | 50     | 50     | 0      |
| <i>Didymoglossum hymenoides</i>    | <i>Didymoglossum hymenoides</i>    | [101]     | 50     | 50     | 0      |
| <i>Didymoglossum hymenoides</i>    | <i>Trichomanes hymenoides</i>      | [134]     | 50     | 50     | 0      |
| <i>Didymoglossum kapplerianum</i>  | <i>Didymoglossum kapplerianum</i>  | [22]      | 50     | 50     | 0      |
| <i>Didymoglossum kapplerianum</i>  | <i>Didymoglossum kapplerianum</i>  | [86]      | 50     | 50     | 0      |
| <i>Didymoglossum kapplerianum</i>  | <i>Trichomanes kapplerianum</i>    | [18]      | 0      | 0      | 100    |
| <i>Didymoglossum kapplerianum</i>  | <i>Didymoglossum kapplerianum</i>  | [140]     | 100    | 0      | 0      |
| <i>Didymoglossum kapplerianum</i>  | <i>Trichomanes kapplerianum</i>    | [20]      | 100    | 0      | 0      |
| <i>Didymoglossum kapplerianum</i>  | <i>Trichomanes hookeri</i>         | [20]      | 100    | 0      | 0      |
| <i>Didymoglossum kapplerianum</i>  | <i>Didymoglossum kapplerianum</i>  | [36]      | 50     | 50     | 0      |
| <i>Didymoglossum kapplerianum</i>  | <i>Trichomanes kapplerianum</i>    | [36]      | 50     | 50     | 0      |
| <i>Didymoglossum kapplerianum</i>  | <i>Didymoglossum kapplerianum</i>  | [43]      | 50     | 50     | 0      |
| <i>Didymoglossum kapplerianum</i>  | <i>Trichomanes kapplerianum</i>    | [94]      | 0      | 50     | 50     |
| <i>Didymoglossum kapplerianum</i>  | <i>Trichomanes kapplerianum</i>    | [29]      | 50     | 50     | 0      |
| <i>Didymoglossum kapplerianum</i>  | <i>Trichomanes kapplerianum</i>    | [95]      | 100    | 0      | 0      |
| <i>Didymoglossum kapplerianum</i>  | <i>Didymoglossum kapplerianum</i>  | [96]      | 100    | 0      | 0      |
| <i>Didymoglossum kapplerianum</i>  | <i>Trichomanes hookeri</i>         | [98]      | 50     | 0      | 50     |
| <i>Didymoglossum kapplerianum</i>  | <i>Trichomanes kapplerianum</i>    | [147]     | 0      | 100    | 0      |
| <i>Didymoglossum kapplerianum</i>  | <i>Trichomanes kapplerianum</i>    | [134]     | 50     | 50     | 0      |
| <i>Didymoglossum kirkii</i>        | <i>Didymoglossum kirkii</i>        | [148]     | 100    | 0      | 0      |
| <i>Didymoglossum kirkii</i>        | <i>Didymoglossum kirkii</i>        | [56]      | 100    | 0      | 0      |
| <i>Didymoglossum kirkii</i>        | <i>Didymoglossum kirkii</i>        | [82]      | 50     | 50     | 0      |
| <i>Didymoglossum kraussii</i>      | <i>Didymoglossum kraussii</i>      | [149]     | 50     | 50     | 0      |
| <i>Didymoglossum kraussii</i>      | <i>Didymoglossum kraussii</i>      | [22]      | 33     | 33     | 34     |
| <i>Didymoglossum kraussii</i>      | <i>Didymoglossum kraussii</i>      | [143]     | 100    | 0      | 0      |
| <i>Didymoglossum kraussii</i>      | <i>Didymoglossum kraussii</i>      | [86]      | 50     | 50     | 0      |

| Valid species name                | Species name in source            | Reference | EV (%) | LV (%) | TV (%) |
|-----------------------------------|-----------------------------------|-----------|--------|--------|--------|
| <i>Didymoglossum kraussii</i>     | <i>Didymoglossum kraussii</i>     | [18]      | 50     | 0      | 50     |
| <i>Didymoglossum kraussii</i>     | <i>Didymoglossum kraussii</i>     | [140]     | 100    | 0      | 0      |
| <i>Didymoglossum kraussii</i>     | <i>Trichomanes kraussii</i>       | [87]      | 100    | 0      | 0      |
| <i>Didymoglossum kraussii</i>     | <i>Didymoglossum kraussii</i>     | [20]      | 100    | 0      | 0      |
| <i>Didymoglossum kraussii</i>     | <i>Didymoglossum kraussii</i>     | [44]      | 100    | 0      | 0      |
| <i>Didymoglossum kraussii</i>     | <i>Didymoglossum kraussii</i>     | [88]      | 100    | 0      | 0      |
| <i>Didymoglossum kraussii</i>     | <i>Didymoglossum kraussii</i>     | [90]      | 50     | 50     | 0      |
| <i>Didymoglossum kraussii</i>     | <i>Didymoglossum kraussii</i>     | [91]      | 100    | 0      | 0      |
| <i>Didymoglossum kraussii</i>     | <i>Didymoglossum kraussii</i>     | [36]      | 50     | 50     | 0      |
| <i>Didymoglossum kraussii</i>     | <i>Didymoglossum kraussii</i>     | [43]      | 50     | 50     | 0      |
| <i>Didymoglossum kraussii</i>     | <i>Didymoglossum kraussii</i>     | [150]     | 95     | 2.5    | 2.5    |
| <i>Didymoglossum kraussii</i>     | <i>Didymoglossum kraussii</i>     | [94]      | 50     | 50     | 0      |
| <i>Didymoglossum kraussii</i>     | <i>Didymoglossum kraussii</i>     | [29]      | 100    | 0      | 0      |
| <i>Didymoglossum kraussii</i>     | <i>Didymoglossum kraussii</i>     | [95]      | 100    | 0      | 0      |
| <i>Didymoglossum kraussii</i>     | <i>Didymoglossum kraussii</i>     | [97]      | 100    | 0      | 0      |
| <i>Didymoglossum kraussii</i>     | <i>Didymoglossum kraussii</i>     | [99]      | 100    | 0      | 0      |
| <i>Didymoglossum kraussii</i>     | <i>Trichomanes kraussii</i>       | [134]     | 50     | 50     | 0      |
| <i>Didymoglossum kraussii</i>     | <i>Didymoglossum kraussii</i>     | [151]     | 100    | 0      | 0      |
| <i>Didymoglossum lehmannii</i>    | <i>Trichomanes lehmannii</i>      | [134]     | 100    | 0      | 0      |
| <i>Didymoglossum lenormandii</i>  | <i>Didymoglossum lenormandii</i>  | [83]      | 50     | 0      | 50     |
| <i>Didymoglossum lenormandii</i>  | <i>Didymoglossum lenormandii</i>  | [148]     | 100    | 0      | 0      |
| <i>Didymoglossum lenormandii</i>  | <i>Didymoglossum lenormandii</i>  | [56]      | 67     | 33     | 0      |
| <i>Didymoglossum lenormandii</i>  | <i>Didymoglossum lenormandii</i>  | [82]      | 50     | 50     | 0      |
| <i>Didymoglossum lenormandii</i>  | <i>Microgonium lenormandii</i>    | [100]     | 100    | 0      | 0      |
| <i>Didymoglossum liberiense</i>   | <i>Trichomanes liberiense</i>     | [20]      | 100    | 0      | 0      |
| <i>Didymoglossum liberiense</i>   | <i>Trichomanes liberiense</i>     | [72]      | 100    | 0      | 0      |
| <i>Didymoglossum liberiense</i>   | <i>Trichomanes liberiense</i>     | [73]      | 100    | 0      | 0      |
| <i>Didymoglossum lineolatum</i>   | <i>Didymoglossum lineolatum</i>   | [22]      | 50     | 50     | 0      |
| <i>Didymoglossum lineolatum</i>   | <i>Trichomanes lineolatum</i>     | [20]      | 100    | 0      | 0      |
| <i>Didymoglossum lineolatum</i>   | <i>Didymoglossum lineolatum</i>   | [36]      | 50     | 50     | 0      |
| <i>Didymoglossum lineolatum</i>   | <i>Trichomanes lineolatum</i>     | [36]      | 50     | 50     | 0      |
| <i>Didymoglossum lineolatum</i>   | <i>Trichomanes lineolatum</i>     | [134]     | 50     | 50     | 0      |
| <i>Didymoglossum lorencei</i>     | <i>Didymoglossum lorencei</i>     | [82]      | 50     | 50     | 0      |
| <i>Didymoglossum lorencei</i>     | <i>Didymoglossum lorencei</i>     | [152]     | 0      | 100    | 0      |
| <i>Didymoglossum melanopus</i>    | <i>Trichomanes melanopus</i>      | [20]      | 100    | 0      | 0      |
| <i>Didymoglossum membranaceum</i> | <i>Didymoglossum membranaceum</i> | [22]      | 50     | 50     | 0      |
| <i>Didymoglossum membranaceum</i> | <i>Didymoglossum membranaceum</i> | [86]      | 50     | 50     | 0      |
| <i>Didymoglossum membranaceum</i> | <i>Trichomanes membranaceum</i>   | [18]      | 50     | 0      | 50     |
| <i>Didymoglossum membranaceum</i> | <i>Trichomanes membranaceum</i>   | [20]      | 100    | 0      | 0      |
| <i>Didymoglossum membranaceum</i> | <i>Didymoglossum membranaceum</i> | [44]      | 33.3   | 33.3   | 33.4   |
| <i>Didymoglossum membranaceum</i> | <i>Didymoglossum membranaceum</i> | [90]      | 85     | 15     | 0      |
| <i>Didymoglossum membranaceum</i> | <i>Didymoglossum membranaceum</i> | [91]      | 0      | 0      | 100    |
| <i>Didymoglossum membranaceum</i> | <i>Didymoglossum membranaceum</i> | [36]      | 50     | 50     | 0      |
| <i>Didymoglossum membranaceum</i> | <i>Trichomanes membranaceum</i>   | [36]      | 50     | 50     | 0      |
| <i>Didymoglossum membranaceum</i> | <i>Didymoglossum membranaceum</i> | [43]      | 50     | 50     | 0      |
| <i>Didymoglossum membranaceum</i> | <i>Trichomanes membranaceum</i>   | [94]      | 50     | 50     | 0      |
| <i>Didymoglossum membranaceum</i> | <i>Trichomanes membranaceum</i>   | [29]      | 0      | 100    | 0      |
| <i>Didymoglossum membranaceum</i> | <i>Trichomanes membranaceum</i>   | [95]      | 0      | 33     | 67     |
| <i>Didymoglossum membranaceum</i> | <i>Trichomanes membranaceum</i>   | [102]     | 50     | 50     | 0      |
| <i>Didymoglossum mindorense</i>   | <i>Trichomanes mindorense</i>     | [111]     | 0      | 0      | 100    |
| <i>Didymoglossum mindorense</i>   | <i>Didymoglossum mindorense</i>   | [62]      | 100    | 0      | 0      |

| Valid species name                  | Species name in source              | Reference | EV (%) | LV (%) | TV (%) |
|-------------------------------------|-------------------------------------|-----------|--------|--------|--------|
| <i>Didymoglossum mindorense</i>     | <i>Microgonium mindorense</i>       | [137]     | 85     | 15     | 0      |
| <i>Didymoglossum mindorense</i>     | <i>Didymoglossum mindorense</i>     | [137]     | 85     | 15     | 0      |
| <i>Didymoglossum mindorense</i>     | <i>Trichomanes craspedoneurum</i>   | [20]      | 100    | 0      | 0      |
| <i>Didymoglossum mindorense</i>     | <i>Trichomanes mindorense</i>       | [20]      | 100    | 0      | 0      |
| <i>Didymoglossum mindorense</i>     | <i>Didymoglossum mindorense</i>     | [80]      | 100    | 0      | 0      |
| <i>Didymoglossum mindorense</i>     | <i>Didymoglossum mindorense</i>     | [75]      | 100    | 0      | 0      |
| <i>Didymoglossum montanum</i>       | <i>Trichomanes montanum</i>         | [20]      | 100    | 0      | 0      |
| <i>Didymoglossum montanum</i>       | <i>Didymoglossum montanum</i>       | [56]      | 100    | 0      | 0      |
| <i>Didymoglossum motleyi</i>        | <i>Didymoglossum motleyi</i>        | [137]     | 85     | 15     | 0      |
| <i>Didymoglossum motleyi</i>        | <i>Microgonium motleyi</i>          | [137]     | 85     | 15     | 0      |
| <i>Didymoglossum motleyi</i>        | <i>Trichomanes motleyi</i>          | [20]      | 100    | 0      | 0      |
| <i>Didymoglossum motleyi</i>        | <i>Didymoglossum motleyi</i>        | [79]      | 100    | 0      | 0      |
| <i>Didymoglossum motleyi</i>        | <i>Didymoglossum motleyi</i>        | [61]      | 85     | 15     | 0      |
| <i>Didymoglossum motleyi</i>        | <i>Didymoglossum motleyi</i>        | [80]      | 100    | 0      | 0      |
| <i>Didymoglossum motleyi</i>        | <i>Didymoglossum motleyi</i>        | [136]     | 95     | 5      | 0      |
| <i>Didymoglossum motleyi</i>        | <i>Didymoglossum motleyi</i>        | [81]      | 100    | 0      | 0      |
| <i>Didymoglossum motleyi</i>        | <i>Didymoglossum motleyi</i>        | [75]      | 100    | 0      | 0      |
| <i>Didymoglossum nummularium</i>    | <i>Didymoglossum nummularium</i>    | [22]      | 50     | 50     | 0      |
| <i>Didymoglossum nummularium</i>    | <i>Trichomanes nummularium</i>      | [18]      | 100    | 0      | 0      |
| <i>Didymoglossum nummularium</i>    | <i>Trichomanes nummularium</i>      | [20]      | 100    | 0      | 0      |
| <i>Didymoglossum nummularium</i>    | <i>Didymoglossum nummularium</i>    | [36]      | 50     | 50     | 0      |
| <i>Didymoglossum nummularium</i>    | <i>Trichomanes nummularium</i>      | [36]      | 50     | 50     | 0      |
| <i>Didymoglossum nummularium</i>    | <i>Trichomanes nummularium</i>      | [94]      | 100    | 0      | 0      |
| <i>Didymoglossum nummularium</i>    | <i>Trichomanes nummularium</i>      | [99]      | 100    | 0      | 0      |
| <i>Didymoglossum nummularium</i>    | <i>Trichomanes nummularium</i>      | [134]     | 100    | 0      | 0      |
| <i>Didymoglossum ovale</i>          | <i>Didymoglossum ovale</i>          | [45]      | 100    | 0      | 0      |
| <i>Didymoglossum ovale</i>          | <i>Didymoglossum ovale</i>          | [22]      | 50     | 50     | 0      |
| <i>Didymoglossum ovale</i>          | <i>Trichomanes ovale</i>            | [18]      | 50     | 0      | 50     |
| <i>Didymoglossum ovale</i>          | <i>Didymoglossum ovale</i>          | [140]     | 100    | 0      | 0      |
| <i>Didymoglossum ovale</i>          | <i>Trichomanes ovale</i>            | [20]      | 100    | 0      | 0      |
| <i>Didymoglossum ovale</i>          | <i>Didymoglossum ovale</i>          | [44]      | 100    | 0      | 0      |
| <i>Didymoglossum ovale</i>          | <i>Didymoglossum ovale</i>          | [36]      | 50     | 50     | 0      |
| <i>Didymoglossum ovale</i>          | <i>Trichomanes ovale</i>            | [36]      | 50     | 50     | 0      |
| <i>Didymoglossum ovale</i>          | <i>Didymoglossum ovale</i>          | [43]      | 50     | 50     | 0      |
| <i>Didymoglossum ovale</i>          | <i>Trichomanes ovale</i>            | [94]      | 50     | 50     | 0      |
| <i>Didymoglossum ovale</i>          | <i>Trichomanes ovale</i>            | [29]      | 50     | 50     | 0      |
| <i>Didymoglossum ovale</i>          | <i>Didymoglossum ovale</i>          | [96]      | 50     | 50     | 0      |
| <i>Didymoglossum ovale</i>          | <i>Trichomanes ovale</i>            | [99]      | 50     | 50     | 0      |
| <i>Didymoglossum ovale</i>          | <i>Didymoglossum ovale</i>          | [101]     | 50     | 50     | 0      |
| <i>Didymoglossum ovale</i>          | <i>Trichomanes ovale</i>            | [134]     | 50     | 50     | 0      |
| <i>Didymoglossum ovale</i>          | <i>Didymoglossum ovale</i>          | [151]     | 100    | 0      | 0      |
| <i>Didymoglossum petersii</i>       | <i>Trichomanes petersii</i>         | [20]      | 100    | 0      | 0      |
| <i>Didymoglossum petersii</i>       | <i>Didymoglossum petersii</i>       | [153]     | 0      | 0      | 100    |
| <i>Didymoglossum petersii</i>       | <i>Didymoglossum petersii</i>       | [117]     | 50     | 50     | 0      |
| <i>Didymoglossum petersii</i>       | <i>Didymoglossum petersii</i>       | [150]     | 15     | 85     | 0      |
| <i>Didymoglossum petersii</i>       | <i>Trichomanes petersii</i>         | [94]      | 100    | 0      | 0      |
| <i>Didymoglossum petersii</i>       | <i>Didymoglossum petersii</i>       | [154]     | 0      | 100    | 0      |
| <i>Didymoglossum petersii</i>       | <i>Trichomanes petersii</i>         | [134]     | 50     | 50     | 0      |
| <i>Didymoglossum pinnatinervium</i> | <i>Didymoglossum pinnatinervium</i> | [22]      | 100    | 0      | 0      |
| <i>Didymoglossum pinnatinervium</i> | <i>Trichomanes pinnatinervium</i>   | [20]      | 100    | 0      | 0      |
| <i>Didymoglossum pinnatinervium</i> | <i>Trichomanes pinnatinervium</i>   | [29]      | 100    | 0      | 0      |

| Valid species name                  | Species name in source             | Reference | EV (%) | LV (%) | TV (%) |
|-------------------------------------|------------------------------------|-----------|--------|--------|--------|
| <i>Didymoglossum pinnatinervium</i> | <i>Trichomanes pinnatinervium</i>  | [134]     | 100    | 0      | 0      |
| <i>Didymoglossum punctatum</i>      | <i>Didymoglossum punctatum</i>     | [22]      | 50     | 50     | 0      |
| <i>Didymoglossum punctatum</i>      | <i>Didymoglossum punctatum</i>     | [86]      | 50     | 50     | 0      |
| <i>Didymoglossum punctatum</i>      | <i>Trichomanes punctatum</i>       | [18]      | 50     | 0      | 50     |
| <i>Didymoglossum punctatum</i>      | <i>Didymoglossum punctatum</i>     | [140]     | 100    | 0      | 0      |
| <i>Didymoglossum punctatum</i>      | <i>Didymoglossum punctatum</i>     | [132]     | 100    | 0      | 0      |
| <i>Didymoglossum punctatum</i>      | <i>Trichomanes punctatum</i>       | [20]      | 100    | 0      | 0      |
| <i>Didymoglossum punctatum</i>      | <i>Didymoglossum punctatum</i>     | [36]      | 33     | 33     | 34     |
| <i>Didymoglossum punctatum</i>      | <i>Trichomanes punctatum</i>       | [36]      | 33.3   | 33.3   | 33.4   |
| <i>Didymoglossum punctatum</i>      | <i>Didymoglossum punctatum</i>     | [43]      | 100    | 0      | 0      |
| <i>Didymoglossum punctatum</i>      | <i>Didymoglossum punctatum</i>     | [150]     | 5      | 95     | 0      |
| <i>Didymoglossum punctatum</i>      | <i>Trichomanes punctatum</i>       | [94]      | 33.4   | 33.3   | 33.3   |
| <i>Didymoglossum punctatum</i>      | <i>Trichomanes punctatum</i>       | [29]      | 100    | 0      | 0      |
| <i>Didymoglossum punctatum</i>      | <i>Trichomanes punctatum</i>       | [95]      | 100    | 0      | 0      |
| <i>Didymoglossum punctatum</i>      | <i>Trichomanes punctatum</i>       | [99]      | 50     | 50     | 0      |
| <i>Didymoglossum punctatum</i>      | <i>Trichomanes punctatum</i>       | [134]     | 33.3   | 33.3   | 33.4   |
| <i>Didymoglossum punctatum</i>      | <i>Trichomanes punctatum</i>       | [102]     | 50     | 50     | 0      |
| <i>Didymoglossum punctatum</i>      | <i>Didymoglossum punctatum</i>     | [151]     | 100    | 0      | 0      |
| <i>Didymoglossum pusillum</i>       | <i>Didymoglossum pusillum</i>      | [22]      | 50     | 50     | 0      |
| <i>Didymoglossum pusillum</i>       | <i>Trichomanes pusillum</i>        | [20]      | 100    | 0      | 0      |
| <i>Didymoglossum pusillum</i>       | <i>Didymoglossum pusillum</i>      | [36]      | 100    | 0      | 0      |
| <i>Didymoglossum pusillum</i>       | <i>Didymoglossum pusillum</i>      | [94]      | 100    | 0      | 0      |
| <i>Didymoglossum pusillum</i>       | <i>Trichomanes pusillum</i>        | [134]     | 100    | 0      | 0      |
| <i>Didymoglossum reptans</i>        | <i>Didymoglossum reptans</i>       | [45]      | 50     | 50     | 0      |
| <i>Didymoglossum reptans</i>        | <i>Didymoglossum reptans</i>       | [146]     | 50     | 50     | 0      |
| <i>Didymoglossum reptans</i>        | <i>Didymoglossum reptans</i>       | [83]      | 50     | 50     | 0      |
| <i>Didymoglossum reptans</i>        | <i>Didymoglossum reptans</i>       | [84]      | 85     | 0      | 15     |
| <i>Didymoglossum reptans</i>        | <i>Didymoglossum reptans</i>       | [22]      | 33.3   | 33.3   | 33.4   |
| <i>Didymoglossum reptans</i>        | <i>Trichomanes reptans</i>         | [18]      | 50     | 0      | 50     |
| <i>Didymoglossum reptans</i>        | <i>Trichomanes reptans</i>         | [20]      | 100    | 0      | 0      |
| <i>Didymoglossum reptans</i>        | <i>Didymoglossum reptans</i>       | [44]      | 50     | 50     | 0      |
| <i>Didymoglossum reptans</i>        | <i>Didymoglossum reptans</i>       | [88]      | 100    | 0      | 0      |
| <i>Didymoglossum reptans</i>        | <i>Didymoglossum reptans</i>       | [91]      | 100    | 0      | 0      |
| <i>Didymoglossum reptans</i>        | <i>Didymoglossum reptans</i>       | [36]      | 33.3   | 33.3   | 33.4   |
| <i>Didymoglossum reptans</i>        | <i>Trichomanes reptans</i>         | [36]      | 33.3   | 33.3   | 33.4   |
| <i>Didymoglossum reptans</i>        | <i>Didymoglossum reptans</i>       | [43]      | 50     | 50     | 0      |
| <i>Didymoglossum reptans</i>        | <i>Trichomanes reptans</i>         | [94]      | 50     | 50     | 0      |
| <i>Didymoglossum reptans</i>        | <i>Trichomanes reptans</i>         | [155]     | 100    | 0      | 0      |
| <i>Didymoglossum reptans</i>        | <i>Didymoglossum reptans</i>       | [133]     | 95     | 0      | 5      |
| <i>Didymoglossum reptans</i>        | <i>Didymoglossum reptans</i>       | [96]      | 100    | 0      | 0      |
| <i>Didymoglossum reptans</i>        | <i>Didymoglossum reptans</i>       | [97]      | 100    | 0      | 0      |
| <i>Didymoglossum reptans</i>        | <i>Didymoglossum reptans</i>       | [66]      | 50     | 50     | 0      |
| <i>Didymoglossum reptans</i>        | <i>Didymoglossum robinsonii</i>    | [82]      | 100    | 0      | 0      |
| <i>Didymoglossum reptans</i>        | <i>Didymoglossum reptans</i>       | [101]     | 50     | 50     | 0      |
| <i>Didymoglossum reptans</i>        | <i>Trichomanes reptans</i>         | [134]     | 50     | 50     | 0      |
| <i>Didymoglossum reptans</i>        | <i>Trichomanes reptans</i>         | [100]     | 0      | 100    | 0      |
| <i>Didymoglossum rhipidophyllum</i> | <i>Trichomanes rhipidophyllum</i>  | [20]      | 100    | 0      | 0      |
| <i>Didymoglossum rhipidophyllum</i> | <i>Trichomanes rhipidophyllum</i>  | [94]      | 100    | 0      | 0      |
| <i>Didymoglossum rhipidophyllum</i> | <i>Trichomanes rhipidophyllum</i>  | [134]     | 100    | 0      | 0      |
| <i>Didymoglossum rotundifolium</i>  | <i>Didymoglossum rotundifolium</i> | [56]      | 100    | 0      | 0      |
| <i>Didymoglossum rotundifolium</i>  | <i>Didymoglossum rotundifolium</i> | [82]      | 50     | 50     | 0      |

| Valid species name               | Species name in source           | Reference | EV (%) | LV (%) | TV (%) |
|----------------------------------|----------------------------------|-----------|--------|--------|--------|
| <i>Didymoglossum sublimbatum</i> | <i>Didymoglossum sublimbatum</i> | [62]      | 100    | 0      | 0      |
| <i>Didymoglossum sublimbatum</i> | <i>Trichomanes sublimbatum</i>   | [20]      | 100    | 0      | 0      |
| <i>Didymoglossum sublimbatum</i> | <i>Didymoglossum sublimbatum</i> | [79]      | 0      | 100    | 0      |
| <i>Didymoglossum sublimbatum</i> | <i>Didymoglossum sublimbatum</i> | [61]      | 0      | 100    | 0      |
| <i>Didymoglossum sublimbatum</i> | <i>Didymoglossum sublimbatum</i> | [80]      | 100    | 0      | 0      |
| <i>Didymoglossum sublimbatum</i> | <i>Didymoglossum sublimbatum</i> | [75]      | 50     | 50     | 0      |
| <i>Didymoglossum sublimbatum</i> | <i>Trichomanes sublimbatum</i>   | [76]      | 50     | 50     | 0      |
| <i>Didymoglossum sublimbatum</i> | <i>Didymoglossum sublimbatum</i> | [53]      | 50     | 0      | 50     |
| <i>Didymoglossum tahitense</i>   | <i>Trichomanes tahitense</i>     | [57]      | 100    | 0      | 0      |
| <i>Didymoglossum tahitense</i>   | <i>Didymoglossum tahitense</i>   | [62]      | 100    | 0      | 0      |
| <i>Didymoglossum tahitense</i>   | <i>Microgonium tahitense</i>     | [137]     | 50     | 50     | 0      |
| <i>Didymoglossum tahitense</i>   | <i>Didymoglossum tahitense</i>   | [137]     | 85     | 15     | 0      |
| <i>Didymoglossum tahitense</i>   | <i>Trichomanes tahitense</i>     | [20]      | 100    | 0      | 0      |
| <i>Didymoglossum tahitense</i>   | <i>Trichomanes omphalodes</i>    | [20]      | 100    | 0      | 0      |
| <i>Didymoglossum tahitense</i>   | <i>Didymoglossum tahitense</i>   | [117]     | 50     | 50     | 0      |
| <i>Didymoglossum tahitense</i>   | <i>Didymoglossum tahitense</i>   | [39]      | 50     | 50     | 0      |
| <i>Didymoglossum tahitense</i>   | <i>Didymoglossum tahitense</i>   | [156]     | 100    | 0      | 0      |
| <i>Didymoglossum tahitense</i>   | <i>Didymoglossum tahitense</i>   | [118]     | 100    | 0      | 0      |
| <i>Didymoglossum tahitense</i>   | <i>Didymoglossum tahitense</i>   | [61]      | 50     | 50     | 0      |
| <i>Didymoglossum tahitense</i>   | <i>Trichomanes tahitense</i>     | [64]      | 50     | 50     | 0      |
| <i>Didymoglossum tahitense</i>   | <i>Didymoglossum tahitense</i>   | [60]      | 100    | 0      | 0      |
| <i>Didymoglossum tahitense</i>   | <i>Didymoglossum tahitense</i>   | [75]      | 100    | 0      | 0      |
| <i>Didymoglossum wallii</i>      | <i>Didymoglossum wallii</i>      | [124]     | 0      | 100    | 0      |
| <i>Didymoglossum wallii</i>      | <i>Trichomanes wallii</i>        | [20]      | 100    | 0      | 0      |
| <i>Didymoglossum wallii</i>      | <i>Didymoglossum wallii</i>      | [61]      | 0      | 100    | 0      |
| <i>Hymenophyllum abruptum</i>    | <i>Hymenophyllum abruptum</i>    | [22]      | 100    | 0      | 0      |
| <i>Hymenophyllum abruptum</i>    | <i>Hymenophyllum abruptum</i>    | [18]      | 100    | 0      | 0      |
| <i>Hymenophyllum abruptum</i>    | <i>Hymenophyllum abruptum</i>    | [44]      | 95     | 0      | 5      |
| <i>Hymenophyllum abruptum</i>    | <i>Hymenophyllum abruptum</i>    | [98]      | 50     | 0      | 50     |
| <i>Hymenophyllum acanthoides</i> | <i>Hymenophyllum acanthoides</i> | [77]      | 0      | 100    | 0      |
| <i>Hymenophyllum acanthoides</i> | <i>Hymenophyllum acanthoides</i> | [62]      | 100    | 0      | 0      |
| <i>Hymenophyllum acanthoides</i> | <i>Hymenophyllum acanthoides</i> | [79]      | 50     | 50     | 0      |
| <i>Hymenophyllum acanthoides</i> | <i>Hymenophyllum acanthoides</i> | [76]      | 50     | 50     | 0      |
| <i>Hymenophyllum acanthoides</i> | <i>Hymenophyllum acanthoides</i> | [80]      | 100    | 0      | 0      |
| <i>Hymenophyllum acanthoides</i> | <i>Hymenophyllum acanthoides</i> | [75]      | 50     | 50     | 0      |
| <i>Hymenophyllum acutum</i>      | <i>Hymenophyllum acutum</i>      | [62]      | 100    | 0      | 0      |
| <i>Hymenophyllum acutum</i>      | <i>Trichomanes acutum</i>        | [20]      | 100    | 0      | 0      |
| <i>Hymenophyllum adiantoides</i> | <i>Hymenophyllum adiantoides</i> | [157]     | 100    | 0      | 0      |
| <i>Hymenophyllum aeruginosum</i> | <i>Hymenophyllum aeruginosum</i> | [66]      | 50     | 50     | 0      |
| <i>Hymenophyllum amabile</i>     | <i>Hymenophyllum amabile</i>     | [43]      | 100    | 0      | 0      |
| <i>Hymenophyllum angustum</i>    | <i>Hymenophyllum angustum</i>    | [22]      | 100    | 0      | 0      |
| <i>Hymenophyllum angustum</i>    | <i>Hymenophyllum angustum</i>    | [36]      | 50     | 50     | 0      |
| <i>Hymenophyllum angustum</i>    | <i>Hymenophyllum angustum</i>    | [43]      | 100    | 0      | 0      |
| <i>Hymenophyllum angustum</i>    | <i>Hymenophyllum angustum</i>    | [151]     | 100    | 0      | 0      |
| <i>Hymenophyllum antillense</i>  | <i>Hymenophyllum antillense</i>  | [36]      | 100    | 0      | 0      |
| <i>Hymenophyllum apiculatum</i>  | <i>Hymenophyllum apiculatum</i>  | [22]      | 100    | 0      | 0      |
| <i>Hymenophyllum apiculatum</i>  | <i>Hymenophyllum apiculatum</i>  | [18]      | 100    | 0      | 0      |
| <i>Hymenophyllum apiculatum</i>  | <i>Hymenophyllum apiculatum</i>  | [36]      | 50     | 0      | 50     |
| <i>Hymenophyllum apiculatum</i>  | <i>Hymenophyllum apiculatum</i>  | [43]      | 95     | 0      | 5      |
| <i>Hymenophyllum apiculatum</i>  | <i>Hymenophyllum apiculatum</i>  | [94]      | 100    | 0      | 0      |
| <i>Hymenophyllum apiculatum</i>  | <i>Hymenophyllum apiculatum</i>  | [29]      | 50     | 50     | 0      |

| Valid species name                | Species name in source            | Reference | EV (%) | LV (%) | TV (%) |
|-----------------------------------|-----------------------------------|-----------|--------|--------|--------|
| <i>Hymenophyllum applanatum</i>   | <i>Hymenophyllum applanatum</i>   | [117]     | 50     | 50     | 0      |
| <i>Hymenophyllum apteryx</i>      | <i>Hymenophyllum apteryx</i>      | [158]     | 100    | 0      | 0      |
| <i>Hymenophyllum apteryx</i>      | <i>Hymenophyllum apteryx</i>      | [43]      | 100    | 0      | 0      |
| <i>Hymenophyllum archboldii</i>   | <i>Hymenophyllum archboldii</i>   | [62]      | 100    | 0      | 0      |
| <i>Hymenophyllum armstrongii</i>  | <i>Hymenophyllum armstrongii</i>  | [68]      | 100    | 0      | 0      |
| <i>Hymenophyllum armstrongii</i>  | <i>Hymenophyllum armstrongii</i>  | [159]     | 85     | 15     | 0      |
| <i>Hymenophyllum armstrongii</i>  | <i>Hymenophyllum cheesemanni</i>  | [160]     | 50     | 0      | 50     |
| <i>Hymenophyllum armstrongii</i>  | <i>Hymenophyllum armstrongii</i>  | [106]     | 100    | 0      | 0      |
| <i>Hymenophyllum asplenioides</i> | <i>Hymenophyllum asplenioides</i> | [84]      | 85     | 0      | 15     |
| <i>Hymenophyllum asplenioides</i> | <i>Hymenophyllum asplenioides</i> | [22]      | 50     | 50     | 0      |
| <i>Hymenophyllum asplenioides</i> | <i>Hymenophyllum asplenioides</i> | [18]      | 100    | 0      | 0      |
| <i>Hymenophyllum asplenioides</i> | <i>Hymenophyllum asplenioides</i> | [87]      | 100    | 0      | 0      |
| <i>Hymenophyllum asplenioides</i> | <i>Trichomanes asplenioides</i>   | [20]      | 0      | 0      | 100    |
| <i>Hymenophyllum asplenioides</i> | <i>Hymenophyllum asplenioides</i> | [44]      | 100    | 0      | 0      |
| <i>Hymenophyllum asplenioides</i> | <i>Hymenophyllum asplenioides</i> | [88]      | 100    | 0      | 0      |
| <i>Hymenophyllum asplenioides</i> | <i>Hymenophyllum asplenioides</i> | [89]      | 100    | 0      | 0      |
| <i>Hymenophyllum asplenioides</i> | <i>Hymenophyllum asplenioides</i> | [161]     | 50     | 50     | 0      |
| <i>Hymenophyllum asplenioides</i> | <i>Hymenophyllum asplenioides</i> | [91]      | 100    | 0      | 0      |
| <i>Hymenophyllum asplenioides</i> | <i>Hymenophyllum asplenioides</i> | [36]      | 100    | 0      | 0      |
| <i>Hymenophyllum asplenioides</i> | <i>Hymenophyllum asplenioides</i> | [94]      | 100    | 0      | 0      |
| <i>Hymenophyllum asplenioides</i> | <i>Hymenophyllum asplenioides</i> | [29]      | 100    | 0      | 0      |
| <i>Hymenophyllum asplenioides</i> | <i>Hymenophyllum asplenioides</i> | [133]     | 100    | 0      | 0      |
| <i>Hymenophyllum asplenioides</i> | <i>Hymenophyllum asplenioides</i> | [97]      | 100    | 0      | 0      |
| <i>Hymenophyllum asplenioides</i> | <i>Hymenophyllum asplenioides</i> | [98]      | 50     | 50     | 0      |
| <i>Hymenophyllum asplenioides</i> | <i>Hymenophyllum asplenioides</i> | [101]     | 50     | 50     | 0      |
| <i>Hymenophyllum asplenioides</i> | <i>Hymenophyllum asplenioides</i> | [105]     | 100    | 0      | 0      |
| <i>Hymenophyllum assurgens</i>    | <i>Hymenophyllum assurgens</i>    | [158]     | 50     | 50     | 0      |
| <i>Hymenophyllum assurgens</i>    | <i>Hymenophyllum assurgens</i>    | [43]      | 100    | 0      | 0      |
| <i>Hymenophyllum australe</i>     | <i>Hymenophyllum australe</i>     | [162]     | 50     | 50     | 0      |
| <i>Hymenophyllum australe</i>     | <i>Hymenophyllum australe</i>     | [117]     | 50     | 50     | 0      |
| <i>Hymenophyllum australe</i>     | <i>Hymenophyllum australe</i>     | [163]     | 50     | 50     | 0      |
| <i>Hymenophyllum australe</i>     | <i>Hymenophyllum australe</i>     | [160]     | 50     | 0      | 50     |
| <i>Hymenophyllum australe</i>     | <i>Hymenophyllum australe</i>     | [106]     | 33.3   | 33.3   | 33.4   |
| <i>Hymenophyllum axillare</i>     | <i>Hymenophyllum axillare</i>     | [22]      | 100    | 0      | 0      |
| <i>Hymenophyllum axillare</i>     | <i>Hymenophyllum axillare</i>     | [36]      | 33.3   | 33.3   | 33.4   |
| <i>Hymenophyllum axillare</i>     | <i>Hymenophyllum axillare</i>     | [43]      | 95     | 2.5    | 2.5    |
| <i>Hymenophyllum axillare</i>     | <i>Hymenophyllum nigrescens</i>   | [94]      | 100    | 0      | 0      |
| <i>Hymenophyllum badium</i>       | <i>Hymenophyllum badium</i>       | [77]      | 0      | 100    | 0      |
| <i>Hymenophyllum badium</i>       | <i>Hymenophyllum badium</i>       | [164]     | 100    | 0      | 0      |
| <i>Hymenophyllum badium</i>       | <i>Hymenophyllum badium</i>       | [62]      | 100    | 0      | 0      |
| <i>Hymenophyllum badium</i>       | <i>Hymenophyllum badium</i>       | [78]      | 50     | 50     | 0      |
| <i>Hymenophyllum badium</i>       | <i>Hymenophyllum badium</i>       | [79]      | 50     | 50     | 0      |
| <i>Hymenophyllum badium</i>       | <i>Hymenophyllum badium</i>       | [61]      | 50     | 50     | 0      |
| <i>Hymenophyllum badium</i>       | <i>Hymenophyllum badium</i>       | [76]      | 50     | 50     | 0      |
| <i>Hymenophyllum badium</i>       | <i>Hymenophyllum badium</i>       | [75]      | 50     | 50     | 0      |
| <i>Hymenophyllum badium</i>       | <i>Hymenophyllum badium</i>       | [165]     | 50     | 50     | 0      |
| <i>Hymenophyllum badium</i>       | <i>Hymenophyllum badium</i>       | [53]      | 34     | 33     | 33     |
| <i>Hymenophyllum baileyianum</i>  | <i>Hymenophyllum baileyianum</i>  | [117]     | 50     | 50     | 0      |
| <i>Hymenophyllum barbatum</i>     | <i>Hymenophyllum barbatum</i>     | [79]      | 50     | 50     | 0      |
| <i>Hymenophyllum barbatum</i>     | <i>Hymenophyllum barbatum</i>     | [61]      | 50     | 50     | 0      |
| <i>Hymenophyllum barbatum</i>     | <i>Hymenophyllum barbatum</i>     | [114]     | 100    | 0      | 0      |

| Valid species name                | Species name in source            | Reference | EV (%) | LV (%) | TV (%) |
|-----------------------------------|-----------------------------------|-----------|--------|--------|--------|
| <i>Hymenophyllum barbatum</i>     | <i>Hymenophyllum barbatum</i>     | [165]     | 50     | 50     | 0      |
| <i>Hymenophyllum barbatum</i>     | <i>Hymenophyllum barbatum</i>     | [53]      | 50     | 0      | 50     |
| <i>Hymenophyllum bivalve</i>      | <i>Hymenophyllum bivalve</i>      | [162]     | 34     | 33     | 33     |
| <i>Hymenophyllum bivalve</i>      | <i>Hymenophyllum bivalve</i>      | [68]      | 100    | 0      | 0      |
| <i>Hymenophyllum bivalve</i>      | <i>Hymenophyllum bivalve</i>      | [117]     | 33.3   | 33.3   | 33.4   |
| <i>Hymenophyllum bivalve</i>      | <i>Hymenophyllum bivalve</i>      | [159]     | 85     | 0      | 15     |
| <i>Hymenophyllum bivalve</i>      | <i>Hymenophyllum bivalve</i>      | [160]     | 50     | 0      | 50     |
| <i>Hymenophyllum bivalve</i>      | <i>Hymenophyllum bivalve</i>      | [106]     | 80     | 0      | 20     |
| <i>Hymenophyllum blandum</i>      | <i>Hymenophyllum blandum</i>      | [62]      | 100    | 0      | 0      |
| <i>Hymenophyllum blandum</i>      | <i>Hymenophyllum blandum</i>      | [78]      | 100    | 0      | 0      |
| <i>Hymenophyllum blandum</i>      | <i>Hymenophyllum blandum</i>      | [61]      | 100    | 0      | 0      |
| <i>Hymenophyllum blandum</i>      | <i>Hymenophyllum blandum</i>      | [76]      | 50     | 50     | 0      |
| <i>Hymenophyllum blandum</i>      | <i>Hymenophyllum blandum</i>      | [75]      | 50     | 50     | 0      |
| <i>Hymenophyllum bontocense</i>   | <i>Hymenophyllum bontocense</i>   | [79]      | 0      | 100    | 0      |
| <i>Hymenophyllum brassii</i>      | <i>Hymenophyllum brassii</i>      | [62]      | 100    | 0      | 0      |
| <i>Hymenophyllum brevifrons</i>   | <i>Hymenophyllum brevifrons</i>   | [140]     | 100    | 0      | 0      |
| <i>Hymenophyllum brevifrons</i>   | <i>Hymenophyllum brevifrons</i>   | [90]      | 100    | 0      | 0      |
| <i>Hymenophyllum brevifrons</i>   | <i>Hymenophyllum brevifrons</i>   | [36]      | 100    | 0      | 0      |
| <i>Hymenophyllum brevifrons</i>   | <i>Hymenophyllum brevifrons</i>   | [94]      | 100    | 0      | 0      |
| <i>Hymenophyllum brevifrons</i>   | <i>Hymenophyllum brevifrons</i>   | [29]      | 100    | 0      | 0      |
| <i>Hymenophyllum brevistipes</i>  | <i>Hymenophyllum brevistipes</i>  | [44]      | 50     | 0      | 50     |
| <i>Hymenophyllum brevistipes</i>  | <i>Hymenophyllum brevistipes</i>  | [43]      | 100    | 0      | 0      |
| <i>Hymenophyllum bryoides</i>     | <i>Hymenophyllum bryoides</i>     | [166]     | 100    | 0      | 0      |
| <i>Hymenophyllum bryophilum</i>   | <i>Hymenophyllum bryophilum</i>   | [62]      | 100    | 0      | 0      |
| <i>Hymenophyllum bryophilum</i>   | <i>Hymenophyllum bryophilum</i>   | [63]      | 50     | 50     | 0      |
| <i>Hymenophyllum caespitosum</i>  | <i>Hymenophyllum caespitosum</i>  | [167]     | 33     | 33     | 34     |
| <i>Hymenophyllum caespitosum</i>  | <i>Hymenophyllum caespitosum</i>  | [168]     | 0      | 100    | 0      |
| <i>Hymenophyllum caparaoense</i>  | <i>Hymenophyllum caparaoense</i>  | [161]     | 100    | 0      | 0      |
| <i>Hymenophyllum caparaoense</i>  | <i>Hymenophyllum caparaoense</i>  | [169]     | 100    | 0      | 0      |
| <i>Hymenophyllum capense</i>      | <i>Hymenophyllum capense</i>      | [83]      | 100    | 0      | 0      |
| <i>Hymenophyllum capense</i>      | <i>Hymenophyllum capense</i>      | [92]      | 50     | 50     | 0      |
| <i>Hymenophyllum capense</i>      | <i>Hymenophyllum capense</i>      | [66]      | 50     | 50     | 0      |
| <i>Hymenophyllum capense</i>      | <i>Hymenophyllum parvum</i>       | [56]      | 100    | 0      | 0      |
| <i>Hymenophyllum capense</i>      | <i>Hymenophyllum capense</i>      | [82]      | 100    | 0      | 0      |
| <i>Hymenophyllum capense</i>      | <i>Hymenophyllum capense</i>      | [100]     | 100    | 0      | 0      |
| <i>Hymenophyllum capillare</i>    | <i>Hymenophyllum capillare</i>    | [83]      | 50     | 50     | 0      |
| <i>Hymenophyllum capillare</i>    | <i>Sphaerocionium splendidum</i>  | [100]     | 85     | 15     | 0      |
| <i>Hymenophyllum capillare</i>    | <i>Hymenophyllum capillare</i>    | [71]      | 50     | 50     | 0      |
| <i>Hymenophyllum capillare</i>    | <i>Hymenophyllum capillare</i>    | [112]     | 100    | 0      | 0      |
| <i>Hymenophyllum capillare</i>    | <i>Hymenophyllum capillare</i>    | [92]      | 50     | 50     | 0      |
| <i>Hymenophyllum capillare</i>    | <i>Hymenophyllum capillare</i>    | [170]     | 67     | 33     | 0      |
| <i>Hymenophyllum capillare</i>    | <i>Sphaerocionium capillare</i>   | [65]      | 100    | 0      | 0      |
| <i>Hymenophyllum capillare</i>    | <i>Hymenophyllum capillare</i>    | [66]      | 0      | 100    | 0      |
| <i>Hymenophyllum capillare</i>    | <i>Hymenophyllum capillare</i>    | [56]      | 50     | 0      | 50     |
| <i>Hymenophyllum capillare</i>    | <i>Hymenophyllum capillare</i>    | [82]      | 100    | 0      | 0      |
| <i>Hymenophyllum capillare</i>    | <i>Hymenophyllum capillare</i>    | [73]      | 100    | 0      | 0      |
| <i>Hymenophyllum capurroi</i>     | <i>Hymenophyllum capurroi</i>     | [146]     | 50     | 50     | 0      |
| <i>Hymenophyllum capurroi</i>     | <i>Hymenophyllum capurroi</i>     | [43]      | 100    | 0      | 0      |
| <i>Hymenophyllum cardunculus</i>  | <i>Hymenophyllum cardunculus</i>  | [80]      | 100    | 0      | 0      |
| <i>Hymenophyllum caudiculatum</i> | <i>Hymenophyllum caudiculatum</i> | [84]      | 85     | 0      | 15     |
| <i>Hymenophyllum caudiculatum</i> | <i>Hymenophyllum caudiculatum</i> | [22]      | 50     | 50     | 0      |



| Valid species name                    | Species name in source                | Reference | EV (%) | LV (%) | TV (%) |
|---------------------------------------|---------------------------------------|-----------|--------|--------|--------|
| <i>Hymenophyllum caudiculatum</i>     | <i>Hymenophyllum caudiculatum</i>     | [171]     | 0      | 0      | 100    |
| <i>Hymenophyllum caudiculatum</i>     | <i>Hymenophyllum caudiculatum</i>     | [88]      | 100    | 0      | 0      |
| <i>Hymenophyllum caudiculatum</i>     | <i>Hymenophyllum caudiculatum</i>     | [89]      | 100    | 0      | 0      |
| <i>Hymenophyllum caudiculatum</i>     | <i>Hymenophyllum caudiculatum</i>     | [161]     | 33.3   | 33.3   | 33.4   |
| <i>Hymenophyllum caudiculatum</i>     | <i>Hymenophyllum caudiculatum</i>     | [167]     | 85     | 7.5    | 7.5    |
| <i>Hymenophyllum caudiculatum</i>     | <i>Hymenophyllum caudatum</i>         | [172]     | 7.5    | 7.5    | 85     |
| <i>Hymenophyllum caudiculatum</i>     | <i>Hymenophyllum caudiculatum</i>     | [172]     | 42.5   | 42.5   | 15     |
| <i>Hymenophyllum caudiculatum</i>     | <i>Hymenophyllum caudiculatum</i>     | [133]     | 100    | 0      | 0      |
| <i>Hymenophyllum caudiculatum</i>     | <i>Hymenophyllum caudiculatum</i>     | [97]      | 100    | 0      | 0      |
| <i>Hymenophyllum caudiculatum</i>     | <i>Hymenophyllum caudatum</i>         | [173]     | 0      | 100    | 0      |
| <i>Hymenophyllum caudiculatum</i>     | <i>Hymenophyllum caudiculatum</i>     | [101]     | 50     | 50     | 0      |
| <i>Hymenophyllum ciliatum</i>         | <i>Hymenophyllum ciliatum</i>         | [169]     | 33.3   | 33.3   | 33.4   |
| <i>Hymenophyllum ciliatum</i>         | <i>Hymenophyllum ciliatum</i>         | [72]      | 50     | 50     | 0      |
| <i>Hymenophyllum ciliatum</i>         | <i>Hymenophyllum ciliatum</i>         | [98]      | 50     | 0      | 50     |
| <i>Hymenophyllum cocosense</i>        | <i>Hymenophyllum cocosense</i>        | [147]     | 50     | 0      | 50     |
| <i>Hymenophyllum compactum</i>        | <i>Hymenophyllum compactum</i>        | [56]      | 100    | 0      | 0      |
| <i>Hymenophyllum consanguineum</i>    | <i>Hymenophyllum consanguineum</i>    | [18]      | 100    | 0      | 0      |
| <i>Hymenophyllum consanguineum</i>    | <i>Hymenophyllum consanguineum</i>    | [91]      | 100    | 0      | 0      |
| <i>Hymenophyllum consanguineum</i>    | <i>Hymenophyllum consanguineum</i>    | [94]      | 100    | 0      | 0      |
| <i>Hymenophyllum consanguineum</i>    | <i>Hymenophyllum consanguineum</i>    | [96]      | 100    | 0      | 0      |
| <i>Hymenophyllum consanguineum</i>    | <i>Hymenophyllum consanguineum</i>    | [105]     | 100    | 0      | 0      |
| <i>Hymenophyllum copelandii</i>       | <i>Hymenophyllum copelandii</i>       | [62]      | 100    | 0      | 0      |
| <i>Hymenophyllum cordobense</i>       | <i>Hymenophyllum cordobense</i>       | [43]      | 33     | 33     | 34     |
| <i>Hymenophyllum cordobense</i>       | <i>Hymenophyllum cordobense</i>       | [174]     | 0      | 100    | 0      |
| <i>Hymenophyllum corrugatum</i>       | <i>Hymenophyllum corrugatum</i>       | [61]      | 50     | 50     | 0      |
| <i>Hymenophyllum corrugatum</i>       | <i>Hymenophyllum corrugatum</i>       | [165]     | 50     | 50     | 0      |
| <i>Hymenophyllum corrugatum</i>       | <i>Hymenophyllum corrugatum</i>       | [53]      | 100    | 0      | 0      |
| <i>Hymenophyllum crassipetiolatum</i> | <i>Hymenophyllum crassipetiolatum</i> | [44]      | 100    | 0      | 0      |
| <i>Hymenophyllum crassipetiolatum</i> | <i>Hymenophyllum crassipetiolatum</i> | [155]     | 100    | 0      | 0      |
| <i>Hymenophyllum crispum</i>          | <i>Hymenophyllum crispum</i>          | [146]     | 50     | 0      | 50     |
| <i>Hymenophyllum crispum</i>          | <i>Hymenophyllum crispum</i>          | [22]      | 100    | 0      | 0      |
| <i>Hymenophyllum crispum</i>          | <i>Hymenophyllum crispum</i>          | [175]     | 100    | 0      | 0      |
| <i>Hymenophyllum crispum</i>          | <i>Hymenophyllum crispum</i>          | [44]      | 50     | 0      | 50     |
| <i>Hymenophyllum crispum</i>          | <i>Hymenophyllum crispum</i>          | [169]     | 33.3   | 33.3   | 33.4   |
| <i>Hymenophyllum crispum</i>          | <i>Hymenophyllum crispum</i>          | [91]      | 100    | 0      | 0      |
| <i>Hymenophyllum crispum</i>          | <i>Hymenophyllum crispum</i>          | [36]      | 50     | 0      | 50     |
| <i>Hymenophyllum crispum</i>          | <i>Hymenophyllum crispum</i>          | [43]      | 33.3   | 33.3   | 33.4   |
| <i>Hymenophyllum crispum</i>          | <i>Hymenophyllum crispum</i>          | [94]      | 100    | 0      | 0      |
| <i>Hymenophyllum crispum</i>          | <i>Hymenophyllum crispum</i>          | [157]     | 100    | 0      | 0      |
| <i>Hymenophyllum crispum</i>          | <i>Hymenophyllum crispum</i>          | [101]     | 0      | 100    | 0      |
| <i>Hymenophyllum crispum</i>          | <i>Hymenophyllum crispum</i>          | [105]     | 100    | 0      | 0      |
| <i>Hymenophyllum cristatum</i>        | <i>Hymenophyllum cristatum</i>        | [43]      | 100    | 0      | 0      |
| <i>Hymenophyllum cruentum</i>         | <i>Hymenophyllum cruentum</i>         | [171]     | 100    | 0      | 0      |
| <i>Hymenophyllum cruentum</i>         | <i>Hymenophyllum cruentum</i>         | [167]     | 95     | 2.5    | 2.5    |
| <i>Hymenophyllum cuneatum</i>         | <i>Hymenophyllum cuneatum</i>         | [167]     | 100    | 0      | 0      |
| <i>Hymenophyllum cupressiforme</i>    | <i>Hymenophyllum cupressiforme</i>    | [162]     | 50     | 0      | 50     |
| <i>Hymenophyllum cupressiforme</i>    | <i>Hymenophyllum cupressiforme</i>    | [117]     | 50     | 50     | 0      |
| <i>Hymenophyllum cupressiforme</i>    | <i>Hymenophyllum cupressiforme</i>    | [163]     | 85     | 15     | 0      |
| <i>Hymenophyllum darwinii</i>         | <i>Hymenophyllum darwinii</i>         | [117]     | 33     | 67     | 0      |
| <i>Hymenophyllum darwinii</i>         | <i>Hymenophyllum darwinii</i>         | [167]     | 15     | 85     | 0      |
| <i>Hymenophyllum delicatulum</i>      | <i>Hymenophyllum delicatulum</i>      | [22]      | 50     | 50     | 0      |

| Valid species name                  | Species name in source              | Reference | EV (%) | LV (%) | TV (%) |
|-------------------------------------|-------------------------------------|-----------|--------|--------|--------|
| <i>Hymenophyllum delicatulum</i>    | <i>Hymenophyllum delicatulum</i>    | [176]     | 0      | 100    | 0      |
| <i>Hymenophyllum delicatulum</i>    | <i>Hymenophyllum delicatulum</i>    | [169]     | 0      | 50     | 50     |
| <i>Hymenophyllum delicatulum</i>    | <i>Hymenophyllum delicatulum</i>    | [101]     | 0      | 100    | 0      |
| <i>Hymenophyllum deltoideum</i>     | <i>Hymenophyllum deltoideum</i>     | [56]      | 100    | 0      | 0      |
| <i>Hymenophyllum demissum</i>       | <i>Hymenophyllum demissum</i>       | [68]      | 15     | 0      | 85     |
| <i>Hymenophyllum demissum</i>       | <i>Hymenophyllum demissum</i>       | [159]     | 15     | 0      | 85     |
| <i>Hymenophyllum demissum</i>       | <i>Hymenophyllum demissum</i>       | [160]     | 50     | 0      | 50     |
| <i>Hymenophyllum demissum</i>       | <i>Hymenophyllum demissum</i>       | [106]     | 15     | 0      | 85     |
| <i>Hymenophyllum dentatum</i>       | <i>Hymenophyllum dentatum</i>       | [167]     | 34     | 33     | 33     |
| <i>Hymenophyllum denticulatum</i>   | <i>Hymenophyllum denticulatum</i>   | [111]     | 100    | 0      | 0      |
| <i>Hymenophyllum denticulatum</i>   | <i>Hymenophyllum denticulatum</i>   | [28]      | 100    | 0      | 0      |
| <i>Hymenophyllum denticulatum</i>   | <i>Hymenophyllum denticulatum</i>   | [57]      | 100    | 0      | 0      |
| <i>Hymenophyllum denticulatum</i>   | <i>Hymenophyllum denticulatum</i>   | [62]      | 100    | 0      | 0      |
| <i>Hymenophyllum denticulatum</i>   | <i>Hymenophyllum denticulatum</i>   | [79]      | 100    | 0      | 0      |
| <i>Hymenophyllum denticulatum</i>   | <i>Hymenophyllum denticulatum</i>   | [61]      | 50     | 50     | 0      |
| <i>Hymenophyllum denticulatum</i>   | <i>Hymenophyllum denticulatum</i>   | [76]      | 50     | 50     | 0      |
| <i>Hymenophyllum denticulatum</i>   | <i>Hymenophyllum denticulatum</i>   | [81]      | 66     | 0      | 34     |
| <i>Hymenophyllum denticulatum</i>   | <i>Hymenophyllum denticulatum</i>   | [75]      | 50     | 50     | 0      |
| <i>Hymenophyllum denticulatum</i>   | <i>Hymenophyllum denticulatum</i>   | [165]     | 50     | 50     | 0      |
| <i>Hymenophyllum denticulatum</i>   | <i>Hymenophyllum denticulatum</i>   | [177]     | 0      | 100    | 0      |
| <i>Hymenophyllum dependens</i>      | <i>Hymenophyllum dependens</i>      | [36]      | 50     | 50     | 0      |
| <i>Hymenophyllum dependens</i>      | <i>Hymenophyllum dependens</i>      | [29]      | 100    | 0      | 0      |
| <i>Hymenophyllum devolii</i>        | <i>Hymenophyllum devolii</i>        | [61]      | 100    | 0      | 0      |
| <i>Hymenophyllum dicranotrichum</i> | <i>Hymenophyllum dicranotrichum</i> | [167]     | 100    | 0      | 0      |
| <i>Hymenophyllum digitatum</i>      | <i>Trichomanes digitatum</i>        | [28]      | 50     | 50     | 0      |
| <i>Hymenophyllum digitatum</i>      | <i>Trichomanes digitatum</i>        | [112]     | 100    | 0      | 0      |
| <i>Hymenophyllum digitatum</i>      | <i>Hymenophyllum digitatum</i>      | [62]      | 100    | 0      | 0      |
| <i>Hymenophyllum digitatum</i>      | <i>Hymenophyllum digitatum</i>      | [39]      | 33     | 33     | 34     |
| <i>Hymenophyllum digitatum</i>      | <i>Hymenophyllum digitatum</i>      | [78]      | 100    | 0      | 0      |
| <i>Hymenophyllum digitatum</i>      | <i>Hymenophyllum digitatum</i>      | [79]      | 0      | 100    | 0      |
| <i>Hymenophyllum digitatum</i>      | <i>Hymenophyllum digitatum</i>      | [61]      | 0      | 100    | 0      |
| <i>Hymenophyllum digitatum</i>      | <i>Hymenophyllum digitatum</i>      | [60]      | 100    | 0      | 0      |
| <i>Hymenophyllum digitatum</i>      | <i>Hymenophyllum digitatum</i>      | [80]      | 100    | 0      | 0      |
| <i>Hymenophyllum digitatum</i>      | <i>Hymenophyllum digitatum</i>      | [56]      | 100    | 0      | 0      |
| <i>Hymenophyllum digitatum</i>      | <i>Crepidomanes digitatum</i>       | [75]      | 50     | 50     | 0      |
| <i>Hymenophyllum digitatum</i>      | <i>Trichomanes digitatum</i>        | [76]      | 50     | 50     | 0      |
| <i>Hymenophyllum digitatum</i>      | <i>Trichomanes digitatum</i>        | [100]     | 100    | 0      | 0      |
| <i>Hymenophyllum dilatatum</i>      | <i>Hymenophyllum dilatatum</i>      | [68]      | 100    | 0      | 0      |
| <i>Hymenophyllum dilatatum</i>      | <i>Hymenophyllum dilatatum</i>      | [159]     | 95     | 0      | 5      |
| <i>Hymenophyllum dilatatum</i>      | <i>Hymenophyllum dilatatum</i>      | [160]     | 100    | 0      | 0      |
| <i>Hymenophyllum dilatatum</i>      | <i>Hymenophyllum dilatatum</i>      | [106]     | 95     | 0      | 5      |
| <i>Hymenophyllum ectocarpon</i>     | <i>Hymenophyllum ectocarpon</i>     | [86]      | 100    | 0      | 0      |
| <i>Hymenophyllum ectocarpon</i>     | <i>Hymenophyllum ectocarpon</i>     | [44]      | 100    | 0      | 0      |
| <i>Hymenophyllum ectocarpon</i>     | <i>Hymenophyllum ectocarpon</i>     | [91]      | 50     | 50     | 0      |
| <i>Hymenophyllum ectocarpon</i>     | <i>Hymenophyllum ectocarpon</i>     | [155]     | 100    | 0      | 0      |
| <i>Hymenophyllum ectocarpon</i>     | <i>Hymenophyllum ectocarpon</i>     | [96]      | 100    | 0      | 0      |
| <i>Hymenophyllum edentulum</i>      | <i>Hymenophyllum bakeri</i>         | [80]      | 100    | 0      | 0      |
| <i>Hymenophyllum elegans</i>        | <i>Hymenophyllum elegans</i>        | [22]      | 50     | 50     | 0      |
| <i>Hymenophyllum elegans</i>        | <i>Hymenophyllum elegans</i>        | [86]      | 50     | 0      | 50     |
| <i>Hymenophyllum elegans</i>        | <i>Hymenophyllum elegans</i>        | [18]      | 100    | 0      | 0      |
| <i>Hymenophyllum elegans</i>        | <i>Hymenophyllum elegans</i>        | [88]      | 100    | 0      | 0      |

| Valid species name                | Species name in source            | Reference | EV (%) | LV (%) | TV (%) |
|-----------------------------------|-----------------------------------|-----------|--------|--------|--------|
| <i>Hymenophyllum elegans</i>      | <i>Hymenophyllum elegans</i>      | [161]     | 50     | 50     | 0      |
| <i>Hymenophyllum elegans</i>      | <i>Hymenophyllum elegans</i>      | [36]      | 50     | 50     | 0      |
| <i>Hymenophyllum elegans</i>      | <i>Hymenophyllum elegans</i>      | [43]      | 33.3   | 33.3   | 33.4   |
| <i>Hymenophyllum elegans</i>      | <i>Hymenophyllum elegans</i>      | [29]      | 100    | 0      | 0      |
| <i>Hymenophyllum elegans</i>      | <i>Hymenophyllum elegans</i>      | [133]     | 100    | 0      | 0      |
| <i>Hymenophyllum elegans</i>      | <i>Hymenophyllum elegans</i>      | [96]      | 100    | 0      | 0      |
| <i>Hymenophyllum elegans</i>      | <i>Hymenophyllum elegans</i>      | [105]     | 100    | 0      | 0      |
| <i>Hymenophyllum emarginatum</i>  | <i>Hymenophyllum emarginatum</i>  | [78]      | 100    | 0      | 0      |
| <i>Hymenophyllum exquisitum</i>   | <i>Hymenophyllum exquisitum</i>   | [178]     | 85     | 15     | 0      |
| <i>Hymenophyllum exsertum</i>     | <i>Hymenophyllum exsertum</i>     | [79]      | 100    | 0      | 0      |
| <i>Hymenophyllum exsertum</i>     | <i>Hymenophyllum exsertum</i>     | [61]      | 50     | 50     | 0      |
| <i>Hymenophyllum exsertum</i>     | <i>Hymenophyllum exsertum</i>     | [76]      | 100    | 0      | 0      |
| <i>Hymenophyllum exsertum</i>     | <i>Hymenophyllum exsertum</i>     | [75]      | 100    | 0      | 0      |
| <i>Hymenophyllum exsertum</i>     | <i>Hymenophyllum exsertum</i>     | [114]     | 100    | 0      | 0      |
| <i>Hymenophyllum exsertum</i>     | <i>Hymenophyllum exsertum</i>     | [165]     | 50     | 50     | 0      |
| <i>Hymenophyllum exsertum</i>     | <i>Hymenophyllum exsertum</i>     | [53]      | 50     | 50     | 0      |
| <i>Hymenophyllum falklandicum</i> | <i>Hymenophyllum falklandicum</i> | [171]     | 0      | 50     | 50     |
| <i>Hymenophyllum falklandicum</i> | <i>Hymenophyllum falklandicum</i> | [167]     | 15     | 70     | 15     |
| <i>Hymenophyllum falklandicum</i> | <i>Hymenophyllum falklandicum</i> | [168]     | 0      | 95     | 5      |
| <i>Hymenophyllum farallonense</i> | <i>Hymenophyllum farallonense</i> | [94]      | 100    | 0      | 0      |
| <i>Hymenophyllum feejeense</i>    | <i>Hymenophyllum feejeense</i>    | [57]      | 100    | 0      | 0      |
| <i>Hymenophyllum fendlerianum</i> | <i>Hymenophyllum fendlerianum</i> | [44]      | 95     | 0      | 5      |
| <i>Hymenophyllum fendlerianum</i> | <i>Hymenophyllum fendlerianum</i> | [91]      | 100    | 0      | 0      |
| <i>Hymenophyllum fendlerianum</i> | <i>Hymenophyllum fendlerianum</i> | [36]      | 50     | 50     | 0      |
| <i>Hymenophyllum fendlerianum</i> | <i>Hymenophyllum fendlerianum</i> | [43]      | 50     | 50     | 0      |
| <i>Hymenophyllum fendlerianum</i> | <i>Hymenophyllum contortum</i>    | [94]      | 100    | 0      | 0      |
| <i>Hymenophyllum fendlerianum</i> | <i>Hymenophyllum fendlerianum</i> | [29]      | 100    | 0      | 0      |
| <i>Hymenophyllum ferax</i>        | <i>Hymenophyllum ferax</i>        | [36]      | 100    | 0      | 0      |
| <i>Hymenophyllum ferax</i>        | <i>Hymenophyllum ferax</i>        | [43]      | 100    | 0      | 0      |
| <i>Hymenophyllum ferrugineum</i>  | <i>Hymenophyllum ferrugineum</i>  | [68]      | 85     | 0      | 15     |
| <i>Hymenophyllum ferrugineum</i>  | <i>Hymenophyllum ferrugineum</i>  | [171]     | 50     | 50     | 0      |
| <i>Hymenophyllum ferrugineum</i>  | <i>Hymenophyllum ferrugineum</i>  | [167]     | 33     | 33     | 34     |
| <i>Hymenophyllum ferrugineum</i>  | <i>Hymenophyllum ferrugineum</i>  | [160]     | 50     | 0      | 50     |
| <i>Hymenophyllum ferrugineum</i>  | <i>Hymenophyllum ferrugineum</i>  | [106]     | 85     | 7.5    | 7.5    |
| <i>Hymenophyllum fimbriatum</i>   | <i>Hymenophyllum fimbriatum</i>   | [79]      | 100    | 0      | 0      |
| <i>Hymenophyllum fimbriatum</i>   | <i>Hymenophyllum fimbriatum</i>   | [61]      | 100    | 0      | 0      |
| <i>Hymenophyllum firmum</i>       | <i>Hymenophyllum firmum</i>       | [62]      | 100    | 0      | 0      |
| <i>Hymenophyllum flabellatum</i>  | <i>Hymenophyllum flabellatum</i>  | [162]     | 50     | 50     | 0      |
| <i>Hymenophyllum flabellatum</i>  | <i>Hymenophyllum flabellatum</i>  | [57]      | 100    | 0      | 0      |
| <i>Hymenophyllum flabellatum</i>  | <i>Hymenophyllum flabellatum</i>  | [68]      | 100    | 0      | 0      |
| <i>Hymenophyllum flabellatum</i>  | <i>Hymenophyllum flabellatum</i>  | [117]     | 50     | 50     | 0      |
| <i>Hymenophyllum flabellatum</i>  | <i>Hymenophyllum flabellatum</i>  | [39]      | 100    | 0      | 0      |
| <i>Hymenophyllum flabellatum</i>  | <i>Hymenophyllum flabellatum</i>  | [179]     | 0      | 100    | 0      |
| <i>Hymenophyllum flabellatum</i>  | <i>Hymenophyllum flabellatum</i>  | [163]     | 85     | 7.5    | 7.5    |
| <i>Hymenophyllum flabellatum</i>  | <i>Hymenophyllum flabellatum</i>  | [159]     | 85     | 7.5    | 7.5    |
| <i>Hymenophyllum flabellatum</i>  | <i>Hymenophyllum flabellatum</i>  | [106]     | 85     | 0      | 15     |
| <i>Hymenophyllum flexuosum</i>    | <i>Hymenophyllum flexuosum</i>    | [68]      | 100    | 0      | 0      |
| <i>Hymenophyllum flexuosum</i>    | <i>Hymenophyllum flexuosum</i>    | [159]     | 50     | 50     | 0      |
| <i>Hymenophyllum foersteri</i>    | <i>Hymenophyllum foersteri</i>    | [62]      | 100    | 0      | 0      |
| <i>Hymenophyllum fragile</i>      | <i>Hymenophyllum fragile</i>      | [84]      | 85     | 0      | 15     |
| <i>Hymenophyllum fragile</i>      | <i>Hymenophyllum fragile</i>      | [22]      | 50     | 50     | 0      |

| Valid species name                 | Species name in source             | Reference | EV (%) | LV (%) | TV (%) |
|------------------------------------|------------------------------------|-----------|--------|--------|--------|
| <i>Hymenophyllum fragile</i>       | <i>Hymenophyllum fragile</i>       | [18]      | 100    | 0      | 0      |
| <i>Hymenophyllum fragile</i>       | <i>Hymenophyllum fragile</i>       | [87]      | 100    | 0      | 0      |
| <i>Hymenophyllum fragile</i>       | <i>Hymenophyllum fragile</i>       | [44]      | 47.5   | 47.5   | 5      |
| <i>Hymenophyllum fragile</i>       | <i>Hymenophyllum fragile</i>       | [88]      | 100    | 0      | 0      |
| <i>Hymenophyllum fragile</i>       | <i>Hymenophyllum venustum</i>      | [161]     | 100    | 0      | 0      |
| <i>Hymenophyllum fragile</i>       | <i>Hymenophyllum fragile</i>       | [161]     | 50     | 50     | 0      |
| <i>Hymenophyllum fragile</i>       | <i>Hymenophyllum fragile</i>       | [169]     | 33.3   | 33.3   | 33.4   |
| <i>Hymenophyllum fragile</i>       | <i>Hymenophyllum venustum</i>      | [169]     | 100    | 0      | 0      |
| <i>Hymenophyllum fragile</i>       | <i>Hymenophyllum fragile</i>       | [91]      | 100    | 0      | 0      |
| <i>Hymenophyllum fragile</i>       | <i>Hymenophyllum fragile</i>       | [36]      | 50     | 50     | 0      |
| <i>Hymenophyllum fragile</i>       | <i>Hymenophyllum fragile</i>       | [43]      | 50     | 0      | 50     |
| <i>Hymenophyllum fragile</i>       | <i>Hymenophyllum fragile</i>       | [94]      | 100    | 0      | 0      |
| <i>Hymenophyllum fragile</i>       | <i>Hymenophyllum fragile</i>       | [96]      | 100    | 0      | 0      |
| <i>Hymenophyllum fragile</i>       | <i>Hymenophyllum fragile</i>       | [101]     | 100    | 0      | 0      |
| <i>Hymenophyllum fragile</i>       | <i>Hymenophyllum fragile</i>       | [105]     | 100    | 0      | 0      |
| <i>Hymenophyllum fuciforme</i>     | <i>Hymenophyllum fuciforme</i>     | [167]     | 50     | 50     | 0      |
| <i>Hymenophyllum fucoides</i>      | <i>Hymenophyllum fucoides</i>      | [145]     | 100    | 0      | 0      |
| <i>Hymenophyllum fucoides</i>      | <i>Hymenophyllum fucoides</i>      | [45]      | 100    | 0      | 0      |
| <i>Hymenophyllum fucoides</i>      | <i>Hymenophyllum fucoides</i>      | [46]      | 100    | 0      | 0      |
| <i>Hymenophyllum fucoides</i>      | <i>Hymenophyllum fucoides</i>      | [22]      | 50     | 50     | 0      |
| <i>Hymenophyllum fucoides</i>      | <i>Hymenophyllum fucoides</i>      | [175]     | 100    | 0      | 0      |
| <i>Hymenophyllum fucoides</i>      | <i>Hymenophyllum fucoides</i>      | [18]      | 50     | 0      | 50     |
| <i>Hymenophyllum fucoides</i>      | <i>Hymenophyllum fucoides</i>      | [44]      | 100    | 0      | 0      |
| <i>Hymenophyllum fucoides</i>      | <i>Hymenophyllum fucoides</i>      | [91]      | 100    | 0      | 0      |
| <i>Hymenophyllum fucoides</i>      | <i>Hymenophyllum fucoides</i>      | [36]      | 50     | 50     | 0      |
| <i>Hymenophyllum fucoides</i>      | <i>Hymenophyllum fucoides</i>      | [43]      | 95     | 2.5    | 2.5    |
| <i>Hymenophyllum fucoides</i>      | <i>Hymenophyllum fucoides</i>      | [94]      | 95     | 5      | 0      |
| <i>Hymenophyllum fucoides</i>      | <i>Hymenophyllum fucoides</i>      | [29]      | 100    | 0      | 0      |
| <i>Hymenophyllum fucoides</i>      | <i>Hymenophyllum fucoides</i>      | [155]     | 100    | 0      | 0      |
| <i>Hymenophyllum fucoides</i>      | <i>Hymenophyllum fucoides</i>      | [26]      | 100    | 0      | 0      |
| <i>Hymenophyllum fucoides</i>      | <i>Hymenophyllum fucoides</i>      | [101]     | 50     | 50     | 0      |
| <i>Hymenophyllum fucoides</i>      | <i>Hymenophyllum fucoides</i>      | [105]     | 100    | 0      | 0      |
| <i>Hymenophyllum fucoides</i>      | <i>Hymenophyllum fucoides</i>      | [180]     | 100    | 0      | 0      |
| <i>Hymenophyllum fujisanense</i>   | <i>Hymenophyllum fujisanense</i>   | [178]     | 42.5   | 42.5   | 15     |
| <i>Hymenophyllum fumarioides</i>   | <i>Hymenophyllum fumarioides</i>   | [78]      | 100    | 0      | 0      |
| <i>Hymenophyllum fumarioides</i>   | <i>Hymenophyllum fumarioides</i>   | [181]     | 100    | 0      | 0      |
| <i>Hymenophyllum fumarioides</i>   | <i>Hymenophyllum tenellum</i>      | [53]      | 33     | 33     | 34     |
| <i>Hymenophyllum gardneri</i>      | <i>Hymenophyllum gardneri</i>      | [81]      | 66     | 34     | 0      |
| <i>Hymenophyllum geluense</i>      | <i>Hymenophyllum geluense</i>      | [62]      | 100    | 0      | 0      |
| <i>Hymenophyllum glaziovii</i>     | <i>Hymenophyllum glaziovii</i>     | [22]      | 50     | 50     | 0      |
| <i>Hymenophyllum gorgoneum</i>     | <i>Hymenophyllum gorgoneum</i>     | [62]      | 100    | 0      | 0      |
| <i>Hymenophyllum hemidimorphum</i> | <i>Hymenophyllum hemidimorphum</i> | [43]      | 100    | 0      | 0      |
| <i>Hymenophyllum hemidimorphum</i> | <i>Hymenophyllum hemidimorphum</i> | [105]     | 100    | 0      | 0      |
| <i>Hymenophyllum hemipteron</i>    | <i>Hymenophyllum hemipteron</i>    | [18]      | 100    | 0      | 0      |
| <i>Hymenophyllum hemipteron</i>    | <i>Hymenophyllum hemipteron</i>    | [91]      | 100    | 0      | 0      |
| <i>Hymenophyllum hemipteron</i>    | <i>Hymenophyllum hemipteron</i>    | [94]      | 100    | 0      | 0      |
| <i>Hymenophyllum hemipteron</i>    | <i>Hymenophyllum hemipteron</i>    | [105]     | 100    | 0      | 0      |
| <i>Hymenophyllum herzogii</i>      | <i>Hymenophyllum herzogii</i>      | [43]      | 0      | 100    | 0      |
| <i>Hymenophyllum hieronymi</i>     | <i>Hymenophyllum hieronymi</i>     | [62]      | 100    | 0      | 0      |
| <i>Hymenophyllum hirsutum</i>      | <i>Hymenophyllum hirsutum</i>      | [83]      | 50     | 50     | 0      |
| <i>Hymenophyllum hirsutum</i>      | <i>Hymenophyllum hirsutum</i>      | [71]      | 85     | 15     | 0      |

| Valid species name                 | Species name in source             | Reference | EV (%) | LV (%) | TV (%) |
|------------------------------------|------------------------------------|-----------|--------|--------|--------|
| <i>Hymenophyllum hirsutum</i>      | <i>Hymenophyllum hirsutum</i>      | [84]      | 85     | 0      | 15     |
| <i>Hymenophyllum hirsutum</i>      | <i>Hymenophyllum hirsutum</i>      | [22]      | 50     | 50     | 0      |
| <i>Hymenophyllum hirsutum</i>      | <i>Hymenophyllum hirsutum</i>      | [86]      | 100    | 0      | 0      |
| <i>Hymenophyllum hirsutum</i>      | <i>Hymenophyllum hirsutum</i>      | [18]      | 100    | 0      | 0      |
| <i>Hymenophyllum hirsutum</i>      | <i>Hymenophyllum hirsutum</i>      | [87]      | 100    | 0      | 0      |
| <i>Hymenophyllum hirsutum</i>      | <i>Hymenophyllum hirsutum</i>      | [44]      | 50     | 0      | 50     |
| <i>Hymenophyllum hirsutum</i>      | <i>Hymenophyllum hirsutum</i>      | [88]      | 100    | 0      | 0      |
| <i>Hymenophyllum hirsutum</i>      | <i>Hymenophyllum hirsutum</i>      | [89]      | 100    | 0      | 0      |
| <i>Hymenophyllum hirsutum</i>      | <i>Hymenophyllum hirsutum</i>      | [161]     | 50     | 50     | 0      |
| <i>Hymenophyllum hirsutum</i>      | <i>Hymenophyllum hirsutum</i>      | [90]      | 50     | 50     | 0      |
| <i>Hymenophyllum hirsutum</i>      | <i>Hymenophyllum hirsutum</i>      | [91]      | 100    | 0      | 0      |
| <i>Hymenophyllum hirsutum</i>      | <i>Hymenophyllum hirsutum</i>      | [36]      | 50     | 50     | 0      |
| <i>Hymenophyllum hirsutum</i>      | <i>Hymenophyllum hirsutum</i>      | [92]      | 50     | 50     | 0      |
| <i>Hymenophyllum hirsutum</i>      | <i>Hymenophyllum hirsutum</i>      | [43]      | 50     | 50     | 0      |
| <i>Hymenophyllum hirsutum</i>      | <i>Hymenophyllum hirsutum</i>      | [170]     | 50     | 50     | 0      |
| <i>Hymenophyllum hirsutum</i>      | <i>Hymenophyllum hirsutum</i>      | [94]      | 100    | 0      | 0      |
| <i>Hymenophyllum hirsutum</i>      | <i>Hymenophyllum hirsutum</i>      | [29]      | 100    | 0      | 0      |
| <i>Hymenophyllum hirsutum</i>      | <i>Hymenophyllum hirsutum</i>      | [155]     | 100    | 0      | 0      |
| <i>Hymenophyllum hirsutum</i>      | <i>Hymenophyllum hirsutum</i>      | [133]     | 100    | 0      | 0      |
| <i>Hymenophyllum hirsutum</i>      | <i>Hymenophyllum hirsutum</i>      | [95]      | 100    | 0      | 0      |
| <i>Hymenophyllum hirsutum</i>      | <i>Hymenophyllum hirsutum</i>      | [96]      | 100    | 0      | 0      |
| <i>Hymenophyllum hirsutum</i>      | <i>Hymenophyllum hirsutum</i>      | [97]      | 100    | 0      | 0      |
| <i>Hymenophyllum hirsutum</i>      | <i>Hymenophyllum hirsutum</i>      | [66]      | 50     | 50     | 0      |
| <i>Hymenophyllum hirsutum</i>      | <i>Hymenophyllum hirsutum</i>      | [56]      | 100    | 0      | 0      |
| <i>Hymenophyllum hirsutum</i>      | <i>Hymenophyllum hirsutum</i>      | [82]      | 100    | 0      | 0      |
| <i>Hymenophyllum hirsutum</i>      | <i>Hymenophyllum hirsutum</i>      | [73]      | 100    | 0      | 0      |
| <i>Hymenophyllum hirsutum</i>      | <i>Hymenophyllum hirsutum</i>      | [102]     | 50     | 0      | 50     |
| <i>Hymenophyllum hirtellum</i>     | <i>Hymenophyllum hirtellum</i>     | [86]      | 100    | 0      | 0      |
| <i>Hymenophyllum hirtellum</i>     | <i>Hymenophyllum hirtellum</i>     | [222]     | 100    | 0      | 0      |
| <i>Hymenophyllum hirtellum</i>     | <i>Hymenophyllum hirtellum</i>     | [102]     | 100    | 0      | 0      |
| <i>Hymenophyllum holochilum</i>    | <i>Hymenophyllum holochilum</i>    | [111]     | 100    | 0      | 0      |
| <i>Hymenophyllum holochilum</i>    | <i>Hymenophyllum holochilum</i>    | [77]      | 0      | 100    | 0      |
| <i>Hymenophyllum holochilum</i>    | <i>Hymenophyllum affine</i>        | [57]      | 100    | 0      | 0      |
| <i>Hymenophyllum holochilum</i>    | <i>Hymenophyllum holochilum</i>    | [62]      | 100    | 0      | 0      |
| <i>Hymenophyllum holochilum</i>    | <i>Hymenophyllum subdimidiatum</i> | [117]     | 50     | 50     | 0      |
| <i>Hymenophyllum holochilum</i>    | <i>Hymenophyllum holochilum</i>    | [78]      | 100    | 0      | 0      |
| <i>Hymenophyllum holochilum</i>    | <i>Hymenophyllum holochilum</i>    | [79]      | 100    | 0      | 0      |
| <i>Hymenophyllum holochilum</i>    | <i>Hymenophyllum holochilum</i>    | [61]      | 100    | 0      | 0      |
| <i>Hymenophyllum holochilum</i>    | <i>Hymenophyllum holochilum</i>    | [75]      | 50     | 50     | 0      |
| <i>Hymenophyllum horizontale</i>   | <i>Hymenophyllum horizontale</i>   | [18]      | 100    | 0      | 0      |
| <i>Hymenophyllum horizontale</i>   | <i>Hymenophyllum horizontale</i>   | [94]      | 100    | 0      | 0      |
| <i>Hymenophyllum horizontale</i>   | <i>Hymenophyllum horizontale</i>   | [105]     | 100    | 0      | 0      |
| <i>Hymenophyllum hosei</i>         | <i>Hymenophyllum hosei</i>         | [80]      | 95     | 0      | 5      |
| <i>Hymenophyllum hygrometricum</i> | <i>Hymenophyllum hygrometricum</i> | [141]     | 50     | 50     | 0      |
| <i>Hymenophyllum imbricatum</i>    | <i>Hymenophyllum imbricatum</i>    | [164]     | 100    | 0      | 0      |
| <i>Hymenophyllum imbricatum</i>    | <i>Hymenophyllum imbricatum</i>    | [57]      | 100    | 0      | 0      |
| <i>Hymenophyllum imbricatum</i>    | <i>Hymenophyllum imbricatum</i>    | [62]      | 100    | 0      | 0      |
| <i>Hymenophyllum imbricatum</i>    | <i>Hymenophyllum imbricatum</i>    | [76]      | 100    | 0      | 0      |
| <i>Hymenophyllum imbricatum</i>    | <i>Hymenophyllum imbricatum</i>    | [75]      | 100    | 0      | 0      |
| <i>Hymenophyllum inaequale</i>     | <i>Trichomanes polyanthum</i>      | [20]      | 0      | 0      | 100    |
| <i>Hymenophyllum inaequale</i>     | <i>Hymenophyllum inaequale</i>     | [78]      | 100    | 0      | 0      |

| Valid species name                | Species name in source            | Reference | EV (%) | LV (%) | TV (%) |
|-----------------------------------|-----------------------------------|-----------|--------|--------|--------|
| <i>Hymenophyllum inaequale</i>    | <i>Hymenophyllum inaequale</i>    | [82]      | 100    | 0      | 0      |
| <i>Hymenophyllum inaequale</i>    | <i>Hymenophyllum inaequale</i>    | [100]     | 100    | 0      | 0      |
| <i>Hymenophyllum interruptum</i>  | <i>Hymenophyllum interruptum</i>  | [36]      | 50     | 50     | 0      |
| <i>Hymenophyllum interruptum</i>  | <i>Hymenophyllum interruptum</i>  | [43]      | 85     | 0      | 15     |
| <i>Hymenophyllum jamesonii</i>    | <i>Hymenophyllum jamesonii</i>    | [36]      | 100    | 0      | 0      |
| <i>Hymenophyllum javanicum</i>    | <i>Hymenophyllum javanicum</i>    | [62]      | 100    | 0      | 0      |
| <i>Hymenophyllum javanicum</i>    | <i>Hymenophyllum javanicum</i>    | [39]      | 50     | 50     | 0      |
| <i>Hymenophyllum javanicum</i>    | <i>Hymenophyllum javanicum</i>    | [61]      | 100    | 0      | 0      |
| <i>Hymenophyllum javanicum</i>    | <i>Hymenophyllum javanicum</i>    | [76]      | 67     | 33     | 0      |
| <i>Hymenophyllum javanicum</i>    | <i>Hymenophyllum javanicum</i>    | [181]     | 100    | 0      | 0      |
| <i>Hymenophyllum javanicum</i>    | <i>Hymenophyllum javanicum</i>    | [81]      | 50     | 50     | 0      |
| <i>Hymenophyllum javanicum</i>    | <i>Hymenophyllum javanicum</i>    | [75]      | 100    | 0      | 0      |
| <i>Hymenophyllum javanicum</i>    | <i>Hymenophyllum javanicum</i>    | [165]     | 0      | 0      | 100    |
| <i>Hymenophyllum jimenezii</i>    | <i>Hymenophyllum jimenezii</i>    | [43]      | 100    | 0      | 0      |
| <i>Hymenophyllum johorensense</i> | <i>Hymenophyllum johorensense</i> | [77]      | 0      | 100    | 0      |
| <i>Hymenophyllum johorensense</i> | <i>Hymenophyllum johorensense</i> | [75]      | 100    | 0      | 0      |
| <i>Hymenophyllum johorensense</i> | <i>Hymenophyllum johorensense</i> | [179]     | 50     | 50     | 0      |
| <i>Hymenophyllum junghuhnii</i>   | <i>Hymenophyllum junghuhnii</i>   | [62]      | 100    | 0      | 0      |
| <i>Hymenophyllum kaieteurum</i>   | <i>Hymenophyllum kaieteurum</i>   | [29]      | 100    | 0      | 0      |
| <i>Hymenophyllum karstenianum</i> | <i>Hymenophyllum karstenianum</i> | [22]      | 50     | 50     | 0      |
| <i>Hymenophyllum karstenianum</i> | <i>Hymenophyllum karstenianum</i> | [36]      | 50     | 50     | 0      |
| <i>Hymenophyllum karstenianum</i> | <i>Hymenophyllum karstenianum</i> | [168]     | 100    | 0      | 0      |
| <i>Hymenophyllum krauseanum</i>   | <i>Hymenophyllum krauseanum</i>   | [167]     | 85     | 0      | 15     |
| <i>Hymenophyllum kuhnii</i>       | <i>Hymenophyllum kuhnii</i>       | [83]      | 50     | 50     | 0      |
| <i>Hymenophyllum kuhnii</i>       | <i>Hymenophyllum kuhnii</i>       | [72]      | 100    | 0      | 0      |
| <i>Hymenophyllum kuhnii</i>       | <i>Hymenophyllum kuhnii</i>       | [92]      | 50     | 50     | 0      |
| <i>Hymenophyllum kuhnii</i>       | <i>Hymenophyllum kuhnii</i>       | [170]     | 100    | 0      | 0      |
| <i>Hymenophyllum kuhnii</i>       | <i>Mecodium kuhnii</i>            | [65]      | 100    | 0      | 0      |
| <i>Hymenophyllum kuhnii</i>       | <i>Hymenophyllum kuhnii</i>       | [66]      | 85     | 0      | 15     |
| <i>Hymenophyllum kuhnii</i>       | <i>Hymenophyllum kuhnii</i>       | [56]      | 100    | 0      | 0      |
| <i>Hymenophyllum kuhnii</i>       | <i>Hymenophyllum kuhnii</i>       | [82]      | 100    | 0      | 0      |
| <i>Hymenophyllum kuhnii</i>       | <i>Hymenophyllum kuhnii</i>       | [73]      | 100    | 0      | 0      |
| <i>Hymenophyllum lamellatum</i>   | <i>Hymenopzhyllum lamellatum</i>  | [180]     | 100    | 0      | 0      |
| <i>Hymenophyllum laminatum</i>    | <i>Hymenophyllum laminatum</i>    | [62]      | 100    | 0      | 0      |
| <i>Hymenophyllum lanatum</i>      | <i>Hymenophyllum lanatum</i>      | [45]      | 100    | 0      | 0      |
| <i>Hymenophyllum lanatum</i>      | <i>Hymenophyllum lanatum</i>      | [86]      | 100    | 0      | 0      |
| <i>Hymenophyllum lanatum</i>      | <i>Hymenophyllum lanatum</i>      | [18]      | 100    | 0      | 0      |
| <i>Hymenophyllum lanatum</i>      | <i>Hymenophyllum lanatum</i>      | [44]      | 100    | 0      | 0      |
| <i>Hymenophyllum lanatum</i>      | <i>Hymenophyllum lanatum</i>      | [36]      | 100    | 0      | 0      |
| <i>Hymenophyllum lanatum</i>      | <i>Hymenophyllum lanatum</i>      | [94]      | 100    | 0      | 0      |
| <i>Hymenophyllum lanatum</i>      | <i>Hymenophyllum lanatum</i>      | [29]      | 100    | 0      | 0      |
| <i>Hymenophyllum lanatum</i>      | <i>Hymenophyllum lanatum</i>      | [155]     | 100    | 0      | 0      |
| <i>Hymenophyllum lanceolatum</i>  | <i>Hymenophyllum lanceolatum</i>  | [110]     | 85     | 7.5    | 7.5    |
| <i>Hymenophyllum lanceolatum</i>  | <i>Hymenophyllum lanceolatum</i>  | [182]     | 100    | 0      | 0      |
| <i>Hymenophyllum latifrons</i>    | <i>Hymenophyllum latifrons</i>    | [86]      | 100    | 0      | 0      |
| <i>Hymenophyllum latisorum</i>    | <i>Hymenophyllum latisorum</i>    | [158]     | 100    | 0      | 0      |
| <i>Hymenophyllum latisorum</i>    | <i>Hymenophyllum latisorum</i>    | [43]      | 100    | 0      | 0      |
| <i>Hymenophyllum ledermannii</i>  | <i>Hymenophyllum ledermannii</i>  | [62]      | 100    | 0      | 0      |
| <i>Hymenophyllum lehmannii</i>    | <i>Hymenophyllum lehmannii</i>    | [36]      | 100    | 0      | 0      |
| <i>Hymenophyllum lehmannii</i>    | <i>Hymenophyllum lehmannii</i>    | [43]      | 100    | 0      | 0      |
| <i>Hymenophyllum lehmannii</i>    | <i>Hymenophyllum lehmannii</i>    | [29]      | 85     | 15     | 0      |

| Valid species name                | Species name in source            | Reference | EV (%) | LV (%) | TV (%) |
|-----------------------------------|-----------------------------------|-----------|--------|--------|--------|
| <i>Hymenophyllum levingei</i>     | <i>Hymenophyllum levingei</i>     | [61]      | 50     | 50     | 0      |
| <i>Hymenophyllum levingei</i>     | <i>Hymenophyllum levingei</i>     | [165]     | 50     | 50     | 0      |
| <i>Hymenophyllum lindenii</i>     | <i>Hymenophyllum lindenii</i>     | [22]      | 50     | 50     | 0      |
| <i>Hymenophyllum lindenii</i>     | <i>Hymenophyllum lindenii</i>     | [36]      | 50     | 0      | 50     |
| <i>Hymenophyllum lindenii</i>     | <i>Hymenophyllum lindenii</i>     | [26]      | 100    | 0      | 0      |
| <i>Hymenophyllum lindenii</i>     | <i>Hymenophyllum lindenii</i>     | [168]     | 100    | 0      | 0      |
| <i>Hymenophyllum lineare</i>      | <i>Hymenophyllum lineare</i>      | [22]      | 50     | 50     | 0      |
| <i>Hymenophyllum lineare</i>      | <i>Hymenophyllum lineare</i>      | [86]      | 100    | 0      | 0      |
| <i>Hymenophyllum lineare</i>      | <i>Hymenophyllum lineare</i>      | [18]      | 100    | 0      | 0      |
| <i>Hymenophyllum lineare</i>      | <i>Hymenophyllum lineare</i>      | [169]     | 100    | 0      | 0      |
| <i>Hymenophyllum lineare</i>      | <i>Hymenophyllum lineare</i>      | [94]      | 100    | 0      | 0      |
| <i>Hymenophyllum lineare</i>      | <i>Hymenophyllum lineare</i>      | [96]      | 50     | 50     | 0      |
| <i>Hymenophyllum lineare</i>      | <i>Hymenophyllum lineare</i>      | [102]     | 100    | 0      | 0      |
| <i>Hymenophyllum lineare</i>      | <i>Hymenophyllum lineare</i>      | [105]     | 100    | 0      | 0      |
| <i>Hymenophyllum lobbii</i>       | <i>Hymenophyllum lobbii</i>       | [183]     | 100    | 0      | 0      |
| <i>Hymenophyllum lobbii</i>       | <i>Hymenophyllum lobbii</i>       | [117]     | 100    | 0      | 0      |
| <i>Hymenophyllum lobbii</i>       | <i>Hymenophyllum lobbii</i>       | [80]      | 100    | 0      | 0      |
| <i>Hymenophyllum longifolium</i>  | <i>Hymenophyllum longifolium</i>  | [62]      | 100    | 0      | 0      |
| <i>Hymenophyllum longifolium</i>  | <i>Hymenophyllum longifolium</i>  | [184]     | 100    | 0      | 0      |
| <i>Hymenophyllum longissimum</i>  | <i>Hymenophyllum longissimum</i>  | [61]      | 50     | 50     | 0      |
| <i>Hymenophyllum longissimum</i>  | <i>Hymenophyllum longissimum</i>  | [165]     | 50     | 50     | 0      |
| <i>Hymenophyllum lyallii</i>      | <i>Sphaerocionium lyallii</i>     | [162]     | 67     | 33     | 0      |
| <i>Hymenophyllum lyallii</i>      | <i>Hymenophyllum lyallii</i>      | [117]     | 50     | 50     | 0      |
| <i>Hymenophyllum lyallii</i>      | <i>Hymenophyllum lyallii</i>      | [159]     | 100    | 0      | 0      |
| <i>Hymenophyllum lyallii</i>      | <i>Hymenophyllum lyallii</i>      | [160]     | 100    | 0      | 0      |
| <i>Hymenophyllum lyallii</i>      | <i>Hymenophyllum lyallii</i>      | [106]     | 100    | 0      | 0      |
| <i>Hymenophyllum macroglossum</i> | <i>Hymenophyllum macroglossum</i> | [81]      | 66     | 34     | 0      |
| <i>Hymenophyllum macrosorum</i>   | <i>Hymenophyllum macrosorum</i>   | [36]      | 0      | 50     | 50     |
| <i>Hymenophyllum macrothecum</i>  | <i>Hymenophyllum macrothecum</i>  | [86]      | 100    | 0      | 0      |
| <i>Hymenophyllum maderense</i>    | <i>Hymenophyllum maderense</i>    | [185]     | 0      | 100    | 0      |
| <i>Hymenophyllum malingii</i>     | <i>Hymenophyllum malingii</i>     | [159]     | 50     | 50     | 0      |
| <i>Hymenophyllum marginatum</i>   | <i>Hymenophyllum marginatum</i>   | [162]     | 0      | 50     | 50     |
| <i>Hymenophyllum marginatum</i>   | <i>Hymenophyllum marginatum</i>   | [163]     | 85     | 15     | 0      |
| <i>Hymenophyllum matthewsii</i>   | <i>Hymenophyllum matthewsii</i>   | [43]      | 95     | 0      | 5      |
| <i>Hymenophyllum maxonii</i>      | <i>Hymenophyllum maxonii</i>      | [145]     | 100    | 0      | 0      |
| <i>Hymenophyllum maxonii</i>      | <i>Hymenophyllum maxonii</i>      | [45]      | 100    | 0      | 0      |
| <i>Hymenophyllum maxonii</i>      | <i>Hymenophyllum maxonii</i>      | [44]      | 100    | 0      | 0      |
| <i>Hymenophyllum maxonii</i>      | <i>Hymenophyllum maxonii</i>      | [90]      | 100    | 0      | 0      |
| <i>Hymenophyllum melanosorum</i>  | <i>Hymenophyllum melanosorum</i>  | [62]      | 100    | 0      | 0      |
| <i>Hymenophyllum microcarpum</i>  | <i>Hymenophyllum microcarpum</i>  | [46]      | 100    | 0      | 0      |
| <i>Hymenophyllum microcarpum</i>  | <i>Hymenophyllum microcarpum</i>  | [22]      | 50     | 50     | 0      |
| <i>Hymenophyllum microcarpum</i>  | <i>Hymenophyllum microcarpum</i>  | [18]      | 50     | 0      | 50     |
| <i>Hymenophyllum microcarpum</i>  | <i>Hymenophyllum microcarpum</i>  | [44]      | 100    | 0      | 0      |
| <i>Hymenophyllum microcarpum</i>  | <i>Hymenophyllum microcarpum</i>  | [161]     | 50     | 50     | 0      |
| <i>Hymenophyllum microcarpum</i>  | <i>Hymenophyllum notabile</i>     | [169]     | 33.4   | 33.3   | 33.3   |
| <i>Hymenophyllum microcarpum</i>  | <i>Hymenophyllum microcarpum</i>  | [91]      | 100    | 0      | 0      |
| <i>Hymenophyllum microcarpum</i>  | <i>Hymenophyllum microcarpum</i>  | [36]      | 50     | 50     | 0      |
| <i>Hymenophyllum microcarpum</i>  | <i>Hymenophyllum microcarpum</i>  | [43]      | 85     | 7.5    | 7.5    |
| <i>Hymenophyllum microcarpum</i>  | <i>Hymenophyllum microcarpum</i>  | [94]      | 95     | 5      | 0      |
| <i>Hymenophyllum microcarpum</i>  | <i>Hymenophyllum microcarpum</i>  | [29]      | 100    | 0      | 0      |
| <i>Hymenophyllum microcarpum</i>  | <i>Hymenophyllum microcarpum</i>  | [98]      | 50     | 0      | 50     |

| Valid species name                   | Species name in source               | Reference | EV (%) | LV (%) | TV (%) |
|--------------------------------------|--------------------------------------|-----------|--------|--------|--------|
| <i>Hymenophyllum microcarpum</i>     | <i>Hymenophyllum microcarpum</i>     | [105]     | 100    | 0      | 0      |
| <i>Hymenophyllum minimum</i>         | <i>Hymenophyllum minimum</i>         | [179]     | 0      | 100    | 0      |
| <i>Hymenophyllum minimum</i>         | <i>Hymenophyllum minimum</i>         | [159]     | 5      | 95     | 0      |
| <i>Hymenophyllum minimum</i>         | <i>Hymenophyllum minimum</i>         | [160]     | 50     | 0      | 50     |
| <i>Hymenophyllum minimum</i>         | <i>Hymenophyllum minimum</i>         | [106]     | 50     | 50     | 0      |
| <i>Hymenophyllum mirificum</i>       | <i>Hymenophyllum mirificum</i>       | [157]     | 50     | 0      | 50     |
| <i>Hymenophyllum molle</i>           | <i>Hymenophyllum molle</i>           | [157]     | 100    | 0      | 0      |
| <i>Hymenophyllum mortonianum</i>     | <i>Hymenophyllum mortonianum</i>     | [94]      | 100    | 0      | 0      |
| <i>Hymenophyllum mortonianum</i>     | <i>Hymenophyllum mortonianum</i>     | [94]      | 100    | 0      | 0      |
| <i>Hymenophyllum mossambicense</i>   | <i>Hymenophyllum mossambicense</i>   | [92]      | 0      | 100    | 0      |
| <i>Hymenophyllum mossambicense</i>   | <i>Hymenophyllum mossambicense</i>   | [66]      | 0      | 100    | 0      |
| <i>Hymenophyllum mossambicense</i>   | <i>Hymenophyllum mossambicense</i>   | [56]      | 0      | 100    | 0      |
| <i>Hymenophyllum mossambicense</i>   | <i>Hymenophyllum mossambicense</i>   | [100]     | 50     | 50     | 0      |
| <i>Hymenophyllum multialatum</i>     | <i>Hymenophyllum multialatum</i>     | [46]      | 100    | 0      | 0      |
| <i>Hymenophyllum multifidum</i>      | <i>Hymenophyllum multifidum</i>      | [68]      | 85     | 15     | 0      |
| <i>Hymenophyllum multifidum</i>      | <i>Hymenophyllum multifidum</i>      | [186]     | 0      | 0      | 100    |
| <i>Hymenophyllum multifidum</i>      | <i>Hymenophyllum multifidum</i>      | [179]     | 100    | 0      | 0      |
| <i>Hymenophyllum multifidum</i>      | <i>Hymenophyllum multifidum</i>      | [159]     | 50     | 0      | 50     |
| <i>Hymenophyllum multifidum</i>      | <i>Hymenophyllum multifidum</i>      | [160]     | 50     | 0      | 50     |
| <i>Hymenophyllum multifidum</i>      | <i>Hymenophyllum multifidum</i>      | [106]     | 33     | 34     | 33     |
| <i>Hymenophyllum myriocarpum</i>     | <i>Hymenophyllum myriocarpum</i>     | [145]     | 100    | 0      | 0      |
| <i>Hymenophyllum myriocarpum</i>     | <i>Hymenophyllum myriocarpum</i>     | [46]      | 100    | 0      | 0      |
| <i>Hymenophyllum myriocarpum</i>     | <i>Hymenophyllum myriocarpum</i>     | [22]      | 50     | 50     | 0      |
| <i>Hymenophyllum myriocarpum</i>     | <i>Hymenophyllum myriocarpum</i>     | [44]      | 100    | 0      | 0      |
| <i>Hymenophyllum myriocarpum</i>     | <i>Hymenophyllum myriocarpum</i>     | [161]     | 100    | 0      | 0      |
| <i>Hymenophyllum myriocarpum</i>     | <i>Hymenophyllum myriocarpum</i>     | [36]      | 100    | 0      | 0      |
| <i>Hymenophyllum myriocarpum</i>     | <i>Hymenophyllum myriocarpum</i>     | [94]      | 100    | 0      | 0      |
| <i>Hymenophyllum myriocarpum</i>     | <i>Hymenophyllum myriocarpum</i>     | [155]     | 100    | 0      | 0      |
| <i>Hymenophyllum myriocarpum</i>     | <i>Hymenophyllum myriocarpum</i>     | [96]      | 100    | 0      | 0      |
| <i>Hymenophyllum myriocarpum</i>     | <i>Hymenophyllum myriocarpum</i>     | [187]     | 100    | 0      | 0      |
| <i>Hymenophyllum myriocarpum</i>     | <i>Hymenophyllum myriocarpum</i>     | [26]      | 100    | 0      | 0      |
| <i>Hymenophyllum myriocarpum</i>     | <i>Hymenophyllum myriocarpum</i>     | [105]     | 100    | 0      | 0      |
| <i>Hymenophyllum nahuelhuapiense</i> | <i>Hymenophyllum nahuelhuapiense</i> | [171]     | 0      | 0      | 100    |
| <i>Hymenophyllum nahuelhuapiense</i> | <i>Hymenophyllum nahuelhuapiense</i> | [167]     | 0      | 50     | 50     |
| <i>Hymenophyllum nanostellatum</i>   | <i>Hymenophyllum nanostellatum</i>   | [36]      | 0      | 100    | 0      |
| <i>Hymenophyllum neocaledonicum</i>  | <i>Hymenophyllum neocaledonicum</i>  | [188]     | 100    | 0      | 0      |
| <i>Hymenophyllum nephrophyllum</i>   | <i>Hymenophyllum nephrophyllum</i>   | [159]     | 70     | 15     | 15     |
| <i>Hymenophyllum nephrophyllum</i>   | <i>Hymenophyllum nephrophyllum</i>   | [160]     | 50     | 0      | 50     |
| <i>Hymenophyllum nephrophyllum</i>   | <i>Hymenophyllum nephrophyllum</i>   | [106]     | 0      | 0      | 100    |
| <i>Hymenophyllum nephrophyllum</i>   | <i>Hymenophyllum nephrophyllum</i>   | [106]     | 50     | 0      | 50     |
| <i>Hymenophyllum nitidulum</i>       | <i>Hymenophyllum nitidulum</i>       | [61]      | 100    | 0      | 0      |
| <i>Hymenophyllum nitidulum</i>       | <i>Hymenophyllum nitidulum</i>       | [81]      | 100    | 0      | 0      |
| <i>Hymenophyllum nitidulum</i>       | <i>Hymenophyllum nitidulum</i>       | [75]      | 100    | 0      | 0      |
| <i>Hymenophyllum novoguineense</i>   | <i>Hymenophyllum novoguineense</i>   | [62]      | 100    | 0      | 0      |
| <i>Hymenophyllum obtusum</i>         | <i>Hymenophyllum obtusum</i>         | [110]     | 100    | 0      | 0      |
| <i>Hymenophyllum obtusum</i>         | <i>Hymenophyllum obtusum</i>         | [182]     | 100    | 0      | 0      |
| <i>Hymenophyllum oligosorum</i>      | <i>Hymenophyllum oligosorum</i>      | [61]      | 100    | 0      | 0      |
| <i>Hymenophyllum ooides</i>          | <i>Hymenophyllum ooides</i>          | [62]      | 100    | 0      | 0      |
| <i>Hymenophyllum ovatum</i>          | <i>Hymenophyllum ovatum</i>          | [62]      | 100    | 0      | 0      |
| <i>Hymenophyllum pachydermicum</i>   | <i>Hymenophyllum pachydermicum</i>   | [80]      | 100    | 0      | 0      |
| <i>Hymenophyllum pallidum</i>        | <i>Crepidomanes pallidum</i>         | [189]     | 100    | 0      | 0      |



| Valid species name                   | Species name in source               | Reference | EV (%) | LV (%) | TV (%) |
|--------------------------------------|--------------------------------------|-----------|--------|--------|--------|
| <i>Hymenophyllum pallidum</i>        | <i>Trichomanes pallidum</i>          | [28]      | 0      | 100    | 0      |
| <i>Hymenophyllum pallidum</i>        | <i>Hymenophyllum pallidum</i>        | [62]      | 100    | 0      | 0      |
| <i>Hymenophyllum pallidum</i>        | <i>Hymenophyllum pallidum</i>        | [20]      | 100    | 0      | 0      |
| <i>Hymenophyllum pallidum</i>        | <i>Hymenophyllum pallidum</i>        | [39]      | 33     | 34     | 33     |
| <i>Hymenophyllum pallidum</i>        | <i>Hymenophyllum pallidum</i>        | [78]      | 100    | 0      | 0      |
| <i>Hymenophyllum pallidum</i>        | <i>Hymenophyllum pallidum</i>        | [79]      | 0      | 100    | 0      |
| <i>Hymenophyllum pallidum</i>        | <i>Hymenophyllum pallidum</i>        | [61]      | 50     | 50     | 0      |
| <i>Hymenophyllum pallidum</i>        | <i>Trichomanes palidum</i>           | [64]      | 100    | 0      | 0      |
| <i>Hymenophyllum pallidum</i>        | <i>Hymenophyllum pallidum</i>        | [60]      | 100    | 0      | 0      |
| <i>Hymenophyllum pallidum</i>        | <i>Hymenophyllum pallidum</i>        | [81]      | 100    | 0      | 0      |
| <i>Hymenophyllum pallidum</i>        | <i>Crepidomanes pallidum</i>         | [75]      | 50     | 50     | 0      |
| <i>Hymenophyllum pallidum</i>        | <i>Trichomanes pallidum</i>          | [76]      | 50     | 50     | 0      |
| <i>Hymenophyllum palmatifidum</i>    | <i>Hymenophyllum palmatifidum</i>    | [124]     | 100    | 0      | 0      |
| <i>Hymenophyllum palmatifidum</i>    | <i>Hymenophyllum palmatifidum</i>    | [75]      | 100    | 0      | 0      |
| <i>Hymenophyllum paniculiflorum</i>  | <i>Hymenophyllum paniculiflorum</i>  | [124]     | 100    | 0      | 0      |
| <i>Hymenophyllum paniculiflorum</i>  | <i>Hymenophyllum paniculiflorum</i>  | [178]     | 85     | 15     | 0      |
| <i>Hymenophyllum paniculiflorum</i>  | <i>Hymenophyllum paniculiflorum</i>  | [78]      | 100    | 0      | 0      |
| <i>Hymenophyllum paniense</i>        | <i>Hymenophyllum paniense</i>        | [190]     | 100    | 0      | 0      |
| <i>Hymenophyllum parallelocarpum</i> | <i>Hymenophyllum parallelocarpum</i> | [178]     | 85     | 15     | 0      |
| <i>Hymenophyllum paucicarpum</i>     | <i>Hymenophyllum siliquosum</i>      | [18]      | 100    | 0      | 0      |
| <i>Hymenophyllum paucicarpum</i>     | <i>Hymenophyllum paucicarpum</i>     | [44]      | 100    | 0      | 0      |
| <i>Hymenophyllum paucicarpum</i>     | <i>Hymenophyllum siliquosum</i>      | [94]      | 100    | 0      | 0      |
| <i>Hymenophyllum paucicarpum</i>     | <i>Hymenophyllum siliquosum</i>      | [105]     | 100    | 0      | 0      |
| <i>Hymenophyllum pectinatum</i>      | <i>Hymenophyllum pectinatum</i>      | [167]     | 15     | 85     | 0      |
| <i>Hymenophyllum peltatum</i>        | <i>Hymenophyllum peltatum</i>        | [83]      | 100    | 0      | 0      |
| <i>Hymenophyllum peltatum</i>        | <i>Hymenophyllum peltatum</i>        | [22]      | 33     | 33     | 34     |
| <i>Hymenophyllum peltatum</i>        | <i>Hymenophyllum peltatum</i>        | [171]     | 100    | 0      | 0      |
| <i>Hymenophyllum peltatum</i>        | <i>Hymenophyllum peltatum</i>        | [117]     | 50     | 50     | 0      |
| <i>Hymenophyllum peltatum</i>        | <i>Hymenophyllum peltatum</i>        | [163]     | 50     | 50     | 0      |
| <i>Hymenophyllum peltatum</i>        | <i>Hymenophyllum peltatum</i>        | [43]      | 0      | 100    | 0      |
| <i>Hymenophyllum peltatum</i>        | <i>Hymenophyllum peltatum</i>        | [159]     | 33.3   | 33.3   | 33.4   |
| <i>Hymenophyllum peltatum</i>        | <i>Hymenophyllum peltatum</i>        | [170]     | 100    | 0      | 0      |
| <i>Hymenophyllum peltatum</i>        | <i>Hymenophyllum peltatum</i>        | [167]     | 95     | 2.5    | 2.5    |
| <i>Hymenophyllum peltatum</i>        | <i>Hymenophyllum peltatum</i>        | [65]      | 100    | 0      | 0      |
| <i>Hymenophyllum peltatum</i>        | <i>Hymenophyllum peltatum</i>        | [66]      | 50     | 50     | 0      |
| <i>Hymenophyllum peltatum</i>        | <i>Hymenophyllum peltatum</i>        | [56]      | 0      | 100    | 0      |
| <i>Hymenophyllum peltatum</i>        | <i>Hymenophyllum peltatum</i>        | [106]     | 33.3   | 33.3   | 33.4   |
| <i>Hymenophyllum peltatum</i>        | <i>Hymenophyllum peltatum</i>        | [101]     | 50     | 50     | 0      |
| <i>Hymenophyllum penangianum</i>     | <i>Hymenophyllum penangianum</i>     | [77]      | 100    | 0      | 0      |
| <i>Hymenophyllum penangianum</i>     | <i>Hymenophyllum penangianum</i>     | [75]      | 100    | 0      | 0      |
| <i>Hymenophyllum pilosissimum</i>    | <i>Hymenophyllum pilosissimum</i>    | [62]      | 100    | 0      | 0      |
| <i>Hymenophyllum pilosissimum</i>    | <i>Hymenophyllum pilosissimum</i>    | [191]     | 85     | 15     | 0      |
| <i>Hymenophyllum pilosissimum</i>    | <i>Hymenophyllum pilosissimum</i>    | [61]      | 50     | 50     | 0      |
| <i>Hymenophyllum pilosissimum</i>    | <i>Hymenophyllum pilosissimum</i>    | [192]     | 50     | 50     | 0      |
| <i>Hymenophyllum platylobum</i>      | <i>Hymenophyllum platylobum</i>      | [43]      | 100    | 0      | 0      |
| <i>Hymenophyllum plicatum</i>        | <i>Hymenophyllum plicatum</i>        | [167]     | 85     | 7.5    | 7.5    |
| <i>Hymenophyllum plumieri</i>        | <i>Hymenophyllum plumieri</i>        | [36]      | 0      | 0      | 100    |
| <i>Hymenophyllum plumieri</i>        | <i>Hymenophyllum plumieri</i>        | [43]      | 85     | 0      | 15     |
| <i>Hymenophyllum plumosum</i>        | <i>Hymenophyllum plumosum</i>        | [22]      | 50     | 50     | 0      |
| <i>Hymenophyllum plumosum</i>        | <i>Hymenophyllum plumosum</i>        | [18]      | 100    | 0      | 0      |
| <i>Hymenophyllum plumosum</i>        | <i>Hymenophyllum plumosum</i>        | [161]     | 33.3   | 33.3   | 33.4   |

| Valid species name              | Species name in source            | Reference | EV (%) | LV (%) | TV (%) |
|---------------------------------|-----------------------------------|-----------|--------|--------|--------|
| <i>Hymenophyllum plumosum</i>   | <i>Sphaerocionium aureum</i>      | [169]     | 100    | 0      | 0      |
| <i>Hymenophyllum plumosum</i>   | <i>Hymenophyllum plumosum</i>     | [43]      | 95     | 0      | 5      |
| <i>Hymenophyllum plumosum</i>   | <i>Hymenophyllum plumosum</i>     | [94]      | 100    | 0      | 0      |
| <i>Hymenophyllum plumosum</i>   | <i>Hymenophyllum plumosum</i>     | [26]      | 100    | 0      | 0      |
| <i>Hymenophyllum plumosum</i>   | <i>Hymenophyllum plumosum</i>     | [26]      | 100    | 0      | 0      |
| <i>Hymenophyllum plumosum</i>   | <i>Hymenophyllum plumosum</i>     | [105]     | 100    | 0      | 0      |
| <i>Hymenophyllum pluviatile</i> | <i>Hymenophyllum pluviatile</i>   | [159]     | 50     | 0      | 50     |
| <i>Hymenophyllum pluviatile</i> | <i>Hymenophyllum pluviatile</i>   | [193]     | 33     | 33     | 34     |
| <i>Hymenophyllum polyanthos</i> | <i>Hymenophyllum polyanthos</i>   | [145]     | 100    | 0      | 0      |
| <i>Hymenophyllum polyanthos</i> | <i>Hymenophyllum polyanthos</i>   | [45]      | 100    | 0      | 0      |
| <i>Hymenophyllum polyanthos</i> | <i>Hymenophyllum polyanthos</i>   | [146]     | 42.5   | 42.5   | 15     |
| <i>Hymenophyllum polyanthos</i> | <i>Hymenophyllum polyanthos</i>   | [77]      | 100    | 0      | 0      |
| <i>Hymenophyllum polyanthos</i> | <i>Hymenophyllum polyanthos</i>   | [71]      | 100    | 0      | 0      |
| <i>Hymenophyllum polyanthos</i> | <i>Hymenophyllum polyanthos</i>   | [84]      | 85     | 0      | 15     |
| <i>Hymenophyllum polyanthos</i> | <i>Hymenophyllum polyanthos</i>   | [46]      | 100    | 0      | 0      |
| <i>Hymenophyllum polyanthos</i> | <i>Hymenophyllum polyanthos</i>   | [22]      | 50     | 50     | 0      |
| <i>Hymenophyllum polyanthos</i> | <i>Hymenophyllum polyanthos</i>   | [57]      | 100    | 0      | 0      |
| <i>Hymenophyllum polyanthos</i> | <i>Hymenophyllum polyanthos</i>   | [175]     | 100    | 0      | 0      |
| <i>Hymenophyllum polyanthos</i> | <i>Hymenophyllum polyanthos</i>   | [86]      | 50     | 50     | 0      |
| <i>Hymenophyllum polyanthos</i> | <i>Hymenophyllum polyanthos</i>   | [141]     | 100    | 0      | 0      |
| <i>Hymenophyllum polyanthos</i> | <i>Hymenophyllum polyanthos</i>   | [18]      | 100    | 0      | 0      |
| <i>Hymenophyllum polyanthos</i> | <i>Hymenophyllum polyanthos</i>   | [87]      | 100    | 0      | 0      |
| <i>Hymenophyllum polyanthos</i> | <i>Hymenophyllum polyanthos</i>   | [194]     | 100    | 0      | 0      |
| <i>Hymenophyllum polyanthos</i> | <i>Hymenophyllum polyanthos</i>   | [88]      | 100    | 0      | 0      |
| <i>Hymenophyllum polyanthos</i> | <i>Hymenophyllum polyanthos</i>   | [89]      | 100    | 0      | 0      |
| <i>Hymenophyllum polyanthos</i> | <i>Hymenophyllum polyanthos</i>   | [161]     | 33.3   | 33.3   | 33.4   |
| <i>Hymenophyllum polyanthos</i> | <i>Hymenophyllum polyanthos</i>   | [90]      | 100    | 0      | 0      |
| <i>Hymenophyllum polyanthos</i> | <i>Hymenophyllum polyanthos</i>   | [91]      | 100    | 0      | 0      |
| <i>Hymenophyllum polyanthos</i> | <i>Hymenophyllum polyanthos</i>   | [36]      | 33.3   | 33.3   | 33.4   |
| <i>Hymenophyllum polyanthos</i> | <i>Hymenophyllum polyanthos</i>   | [195]     | 50     | 50     | 0      |
| <i>Hymenophyllum polyanthos</i> | <i>Hymenophyllum polyanthos</i>   | [43]      | 95     | 0      | 5      |
| <i>Hymenophyllum polyanthos</i> | <i>Hymenophyllum polyanthos</i>   | [196]     | 100    | 0      | 0      |
| <i>Hymenophyllum polyanthos</i> | <i>Hymenophyllum costaricanum</i> | [94]      | 100    | 0      | 0      |
| <i>Hymenophyllum polyanthos</i> | <i>Hymenophyllum polyanthos</i>   | [94]      | 100    | 0      | 0      |
| <i>Hymenophyllum polyanthos</i> | <i>Hymenophyllum polyanthos</i>   | [29]      | 100    | 0      | 0      |
| <i>Hymenophyllum polyanthos</i> | <i>Hymenophyllum polyanthos</i>   | [79]      | 50     | 50     | 0      |
| <i>Hymenophyllum polyanthos</i> | <i>Hymenophyllum polyanthos</i>   | [61]      | 50     | 50     | 0      |
| <i>Hymenophyllum polyanthos</i> | <i>Hymenophyllum polyanthos</i>   | [155]     | 100    | 0      | 0      |
| <i>Hymenophyllum polyanthos</i> | <i>Hymenophyllum polyanthos</i>   | [133]     | 100    | 0      | 0      |
| <i>Hymenophyllum polyanthos</i> | <i>Hymenophyllum polyanthos</i>   | [197]     | 100    | 0      | 0      |
| <i>Hymenophyllum polyanthos</i> | <i>Hymenophyllum polyanthos</i>   | [95]      | 100    | 0      | 0      |
| <i>Hymenophyllum polyanthos</i> | <i>Hymenophyllum polyanthos</i>   | [60]      | 100    | 0      | 0      |
| <i>Hymenophyllum polyanthos</i> | <i>Hymenophyllum polyanthos</i>   | [96]      | 100    | 0      | 0      |
| <i>Hymenophyllum polyanthos</i> | <i>Hymenophyllum polyanthos</i>   | [97]      | 100    | 0      | 0      |
| <i>Hymenophyllum polyanthos</i> | <i>Hymenophyllum polyanthos</i>   | [80]      | 100    | 0      | 0      |
| <i>Hymenophyllum polyanthos</i> | <i>Hymenophyllum polyanthos</i>   | [81]      | 50     | 50     | 0      |
| <i>Hymenophyllum polyanthos</i> | <i>Hymenophyllum polyanthos</i>   | [75]      | 50     | 50     | 0      |
| <i>Hymenophyllum polyanthos</i> | <i>Hymenophyllum polyanthos</i>   | [101]     | 50     | 50     | 0      |
| <i>Hymenophyllum polyanthos</i> | <i>Hymenophyllum polyanthos</i>   | [39]      | 33     | 33     | 34     |
| <i>Hymenophyllum polyanthos</i> | <i>Hymenophyllum polyanthos</i>   | [165]     | 50     | 50     | 0      |
| <i>Hymenophyllum polyanthos</i> | <i>Hymenophyllum polyanthos</i>   | [53]      | 100    | 0      | 0      |

| Valid species name                | Species name in source            | Reference | EV (%) | LV (%) | TV (%) |
|-----------------------------------|-----------------------------------|-----------|--------|--------|--------|
| <i>Hymenophyllum polyanthos</i>   | <i>Hymenophyllum polyanthos</i>   | [105]     | 100    | 0      | 0      |
| <i>Hymenophyllum polyanthos</i>   | <i>Hymenophyllum polyanthos</i>   | [180]     | 100    | 0      | 0      |
| <i>Hymenophyllum prionema</i>     | <i>Hymenophyllum prionema</i>     | [22]      | 100    | 0      | 0      |
| <i>Hymenophyllum proctoris</i>    | <i>Hymenophyllum elegantulum</i>  | [94]      | 100    | 0      | 0      |
| <i>Hymenophyllum proctoris</i>    | <i>Hymenophyllum proctoris</i>    | [198]     | 100    | 0      | 0      |
| <i>Hymenophyllum productum</i>    | <i>Hymenophyllum productum</i>    | [77]      | 0      | 100    | 0      |
| <i>Hymenophyllum productum</i>    | <i>Hymenophyllum productum</i>    | [78]      | 100    | 0      | 0      |
| <i>Hymenophyllum productum</i>    | <i>Hymenophyllum productum</i>    | [79]      | 100    | 0      | 0      |
| <i>Hymenophyllum productum</i>    | <i>Hymenophyllum productum</i>    | [61]      | 100    | 0      | 0      |
| <i>Hymenophyllum productum</i>    | <i>Hymenophyllum productum</i>    | [76]      | 50     | 50     | 0      |
| <i>Hymenophyllum productum</i>    | <i>Hymenophyllum productum</i>    | [75]      | 50     | 50     | 0      |
| <i>Hymenophyllum protrusum</i>    | <i>Hymenophyllum protrusum</i>    | [22]      | 50     | 50     | 0      |
| <i>Hymenophyllum protrusum</i>    | <i>Hymenophyllum decurrens</i>    | [86]      | 100    | 0      | 0      |
| <i>Hymenophyllum protrusum</i>    | <i>Hymenophyllum protrusum</i>    | [86]      | 100    | 0      | 0      |
| <i>Hymenophyllum protrusum</i>    | <i>Hymenophyllum decurrens</i>    | [29]      | 95     | 5      | 0      |
| <i>Hymenophyllum protrusum</i>    | <i>Hymenophyllum decurrens</i>    | [95]      | 100    | 0      | 0      |
| <i>Hymenophyllum pulchellum</i>   | <i>Hymenophyllum pulchellum</i>   | [45]      | 100    | 0      | 0      |
| <i>Hymenophyllum pulchellum</i>   | <i>Hymenophyllum pulchellum</i>   | [84]      | 85     | 0      | 15     |
| <i>Hymenophyllum pulchellum</i>   | <i>Hymenophyllum pulchellum</i>   | [22]      | 50     | 50     | 0      |
| <i>Hymenophyllum pulchellum</i>   | <i>Hymenophyllum pulchellum</i>   | [44]      | 33.3   | 33.3   | 33.4   |
| <i>Hymenophyllum pulchellum</i>   | <i>Hymenophyllum pulchellum</i>   | [88]      | 100    | 0      | 0      |
| <i>Hymenophyllum pulchellum</i>   | <i>Hymenophyllum pulchellum</i>   | [161]     | 50     | 50     | 0      |
| <i>Hymenophyllum pulchellum</i>   | <i>Hymenophyllum pulchellum</i>   | [94]      | 100    | 0      | 0      |
| <i>Hymenophyllum pulchellum</i>   | <i>Hymenophyllum pulchellum</i>   | [101]     | 50     | 50     | 0      |
| <i>Hymenophyllum pulchellum</i>   | <i>Hymenophyllum pulchellum</i>   | [105]     | 100    | 0      | 0      |
| <i>Hymenophyllum pulcherrimum</i> | <i>Hymenophyllum pulcherrimum</i> | [68]      | 100    | 0      | 0      |
| <i>Hymenophyllum pulcherrimum</i> | <i>Hymenophyllum pulcherrimum</i> | [159]     | 80     | 20     | 0      |
| <i>Hymenophyllum pulcherrimum</i> | <i>Hymenophyllum pulcherrimum</i> | [106]     | 100    | 0      | 0      |
| <i>Hymenophyllum pumilio</i>      | <i>Hymenophyllum pumilio</i>      | [199]     | 100    | 0      | 0      |
| <i>Hymenophyllum pumilum</i>      | <i>Hymenophyllum pumilum</i>      | [162]     | 100    | 0      | 0      |
| <i>Hymenophyllum pumilum</i>      | <i>Hymenophyllum pumilum</i>      | [117]     | 33.3   | 33.3   | 33.4   |
| <i>Hymenophyllum pumilum</i>      | <i>Hymenophyllum pumilum</i>      | [150]     | 0      | 100    | 0      |
| <i>Hymenophyllum punctisorum</i>  | <i>Hymenophyllum punctisorum</i>  | [178]     | 0      | 100    | 0      |
| <i>Hymenophyllum pyramidatum</i>  | <i>Hymenophyllum pyramidatum</i>  | [43]      | 90     | 0      | 10     |
| <i>Hymenophyllum quetrihuense</i> | <i>Hymenophyllum quetrihuense</i> | [171]     | 0      | 0      | 100    |
| <i>Hymenophyllum quetrihuense</i> | <i>Hymenophyllum quetrihuense</i> | [167]     | 0      | 0      | 100    |
| <i>Hymenophyllum rarum</i>        | <i>Hymenophyllum rarum</i>        | [162]     | 34     | 33     | 33     |
| <i>Hymenophyllum rarum</i>        | <i>Hymenophyllum rarum</i>        | [68]      | 100    | 0      | 0      |
| <i>Hymenophyllum rarum</i>        | <i>Hymenophyllum rarum</i>        | [163]     | 85     | 15     | 0      |
| <i>Hymenophyllum rarum</i>        | <i>Hymenophyllum rarum</i>        | [160]     | 50     | 0      | 50     |
| <i>Hymenophyllum rarum</i>        | <i>Hymenophyllum rarum</i>        | [106]     | 85     | 15     | 0      |
| <i>Hymenophyllum recurvum</i>     | <i>Hymenophyllum recurvum</i>     | [110]     | 85     | 7.5    | 7.5    |
| <i>Hymenophyllum recurvum</i>     | <i>Hymenophyllum recurvum</i>     | [182]     | 50     | 50     | 0      |
| <i>Hymenophyllum reinwardtii</i>  | <i>Hymenophyllum reinwardtii</i>  | [164]     | 100    | 0      | 0      |
| <i>Hymenophyllum reinwardtii</i>  | <i>Hymenophyllum reinwardtii</i>  | [62]      | 100    | 0      | 0      |
| <i>Hymenophyllum reinwardtii</i>  | <i>Hymenophyllum reinwardtii</i>  | [78]      | 100    | 0      | 0      |
| <i>Hymenophyllum revolutum</i>    | <i>Hymenophyllum revolutum</i>    | [68]      | 50     | 50     | 0      |
| <i>Hymenophyllum revolutum</i>    | <i>Hymenophyllum revolutum</i>    | [159]     | 85     | 15     | 0      |
| <i>Hymenophyllum revolutum</i>    | <i>Hymenophyllum revolutum</i>    | [106]     | 50     | 50     | 0      |
| <i>Hymenophyllum riukiense</i>    | <i>Hymenophyllum riukiense</i>    | [61]      | 100    | 0      | 0      |
| <i>Hymenophyllum roraimense</i>   | <i>Hymenophyllum roraimense</i>   | [22]      | 100    | 0      | 0      |

| Valid species name                  | Species name in source              | Reference | EV (%) | LV (%) | TV (%) |
|-------------------------------------|-------------------------------------|-----------|--------|--------|--------|
| <i>Hymenophyllum roraimense</i>     | <i>Hymenophyllum roraimense</i>     | [36]      | 100    | 0      | 0      |
| <i>Hymenophyllum rubellum</i>       | <i>Hymenophyllum rubellum</i>       | [164]     | 100    | 0      | 0      |
| <i>Hymenophyllum rubellum</i>       | <i>Hymenophyllum rubellum</i>       | [62]      | 100    | 0      | 0      |
| <i>Hymenophyllum rufescens</i>      | <i>Hymenophyllum rufescens</i>      | [159]     | 85     | 7.5    | 7.5    |
| <i>Hymenophyllum rufescens</i>      | <i>Hymenophyllum rufescens</i>      | [160]     | 50     | 0      | 50     |
| <i>Hymenophyllum rufescens</i>      | <i>Hymenophyllum rufescens</i>      | [106]     | 50     | 0      | 50     |
| <i>Hymenophyllum rufum</i>          | <i>Hymenophyllum rufum</i>          | [22]      | 100    | 0      | 0      |
| <i>Hymenophyllum rufum</i>          | <i>Hymenophyllum rufum</i>          | [161]     | 50     | 50     | 0      |
| <i>Hymenophyllum rufum</i>          | <i>Hymenophyllum rufum</i>          | [169]     | 100    | 0      | 0      |
| <i>Hymenophyllum rufum</i>          | <i>Hymenophyllum rufum</i>          | [97]      | 100    | 0      | 0      |
| <i>Hymenophyllum rufum</i>          | <i>Hymenophyllum rufum</i>          | [101]     | 50     | 50     | 0      |
| <i>Hymenophyllum rugosum</i>        | <i>Hymenophyllum rugosum</i>        | [167]     | 50     | 0      | 50     |
| <i>Hymenophyllum ruizianum</i>      | <i>Hymenophyllum ruizianum</i>      | [43]      | 47.5   | 47.5   | 5      |
| <i>Hymenophyllum ruizianum</i>      | <i>Hymenophyllum ruizianum</i>      | [26]      | 100    | 0      | 0      |
| <i>Hymenophyllum saenzianum</i>     | <i>Hymenophyllum saenzianum</i>     | [91]      | 100    | 0      | 0      |
| <i>Hymenophyllum saenzianum</i>     | <i>Hymenophyllum saenzianum</i>     | [94]      | 100    | 0      | 0      |
| <i>Hymenophyllum saenzianum</i>     | <i>Hymenophyllum saenzianum</i>     | [96]      | 100    | 0      | 0      |
| <i>Hymenophyllum sampaioanum</i>    | <i>Hymenophyllum sampaioanum</i>    | [22]      | 100    | 0      | 0      |
| <i>Hymenophyllum sanguinolentum</i> | <i>Hymenophyllum sanguinolentum</i> | [68]      | 100    | 0      | 0      |
| <i>Hymenophyllum sanguinolentum</i> | <i>Hymenophyllum sanguinolentum</i> | [159]     | 50     | 50     | 0      |
| <i>Hymenophyllum sanguinolentum</i> | <i>Hymenophyllum sanguinolentum</i> | [160]     | 50     | 0      | 50     |
| <i>Hymenophyllum sanguinolentum</i> | <i>Hymenophyllum sanguinolentum</i> | [106]     | 85     | 15     | 0      |
| <i>Hymenophyllum scabrum</i>        | <i>Hymenophyllum scabrum</i>        | [68]      | 100    | 0      | 0      |
| <i>Hymenophyllum scabrum</i>        | <i>Hymenophyllum scabrum</i>        | [159]     | 33.3   | 33.3   | 33.4   |
| <i>Hymenophyllum scabrum</i>        | <i>Hymenophyllum scabrum</i>        | [160]     | 50     | 0      | 50     |
| <i>Hymenophyllum scabrum</i>        | <i>Hymenophyllum scabrum</i>        | [106]     | 100    | 0      | 0      |
| <i>Hymenophyllum secundum</i>       | <i>Hymenophyllum secundum</i>       | [167]     | 50     | 0      | 50     |
| <i>Hymenophyllum semiglabrum</i>    | <i>Hymenophyllum semiglabrum</i>    | [18]      | 100    | 0      | 0      |
| <i>Hymenophyllum semiglabrum</i>    | <i>Hymenophyllum semiglabrum</i>    | [94]      | 100    | 0      | 0      |
| <i>Hymenophyllum semiglabrum</i>    | <i>Hymenophyllum semiglabrum</i>    | [96]      | 100    | 0      | 0      |
| <i>Hymenophyllum senterreanum</i>   | <i>Hymenophyllum senterreanum</i>   | [200]     | 100    | 0      | 0      |
| <i>Hymenophyllum sericeum</i>       | <i>Hymenophyllum sericeum</i>       | [22]      | 100    | 0      | 0      |
| <i>Hymenophyllum sericeum</i>       | <i>Hymenophyllum sericeum</i>       | [86]      | 100    | 0      | 0      |
| <i>Hymenophyllum sericeum</i>       | <i>Hymenophyllum sericeum</i>       | [36]      | 100    | 0      | 0      |
| <i>Hymenophyllum sericeum</i>       | <i>Hymenophyllum sericeum</i>       | [43]      | 75     | 25     | 0      |
| <i>Hymenophyllum serrulatum</i>     | <i>Hymenophyllum serrulatum</i>     | [62]      | 100    | 0      | 0      |
| <i>Hymenophyllum serrulatum</i>     | <i>Hymenophyllum serrulatum</i>     | [78]      | 100    | 0      | 0      |
| <i>Hymenophyllum serrulatum</i>     | <i>Hymenophyllum serrulatum</i>     | [79]      | 50     | 50     | 0      |
| <i>Hymenophyllum serrulatum</i>     | <i>Hymenophyllum serrulatum</i>     | [76]      | 50     | 50     | 0      |
| <i>Hymenophyllum serrulatum</i>     | <i>Hymenophyllum serrulatum</i>     | [75]      | 50     | 50     | 0      |
| <i>Hymenophyllum seselifolium</i>   | <i>Hymenophyllum seselifolium</i>   | [22]      | 50     | 0      | 50     |
| <i>Hymenophyllum seselifolium</i>   | <i>Hymenophyllum magellanicum</i>   | [161]     | 34     | 33     | 33     |
| <i>Hymenophyllum seselifolium</i>   | <i>Hymenophyllum seselifolium</i>   | [161]     | 33.3   | 33.3   | 33.4   |
| <i>Hymenophyllum seselifolium</i>   | <i>Hymenophyllum magellanicum</i>   | [167]     | 0      | 0      | 100    |
| <i>Hymenophyllum seselifolium</i>   | <i>Hymenophyllum magellanicum</i>   | [101]     | 50     | 50     | 0      |
| <i>Hymenophyllum sibthorpioides</i> | <i>Hymenophyllum sibthorpioides</i> | [83]      | 100    | 0      | 0      |
| <i>Hymenophyllum sibthorpioides</i> | <i>Hymenophyllum sibthorpioides</i> | [92]      | 50     | 50     | 0      |
| <i>Hymenophyllum sibthorpioides</i> | <i>Hymenophyllum sibthorpioides</i> | [66]      | 50     | 50     | 0      |
| <i>Hymenophyllum sibthorpioides</i> | <i>Hymenophyllum sibthorpioides</i> | [82]      | 100    | 0      | 0      |
| <i>Hymenophyllum sibthorpioides</i> | <i>Hymenophyllum sibthorpioides</i> | [100]     | 50     | 50     | 0      |
| <i>Hymenophyllum sieberi</i>        | <i>Hymenophyllum sieberi</i>        | [18]      | 100    | 0      | 0      |

| Valid species name                 | Species name in source            | Reference | EV (%) | LV (%) | TV (%) |
|------------------------------------|-----------------------------------|-----------|--------|--------|--------|
| <i>Hymenophyllum sieberi</i>       | <i>Hymenophyllum sieberi</i>      | [44]      | 50     | 50     | 0      |
| <i>Hymenophyllum sieberi</i>       | <i>Hymenophyllum sieberi</i>      | [91]      | 100    | 0      | 0      |
| <i>Hymenophyllum sieberi</i>       | <i>Hymenophyllum sieberi</i>      | [36]      | 50     | 50     | 0      |
| <i>Hymenophyllum sieberi</i>       | <i>Hymenophyllum sieberi</i>      | [94]      | 100    | 0      | 0      |
| <i>Hymenophyllum sieberi</i>       | <i>Hymenophyllum sieberi</i>      | [96]      | 100    | 0      | 0      |
| <i>Hymenophyllum sieberi</i>       | <i>Hymenophyllum sieberi</i>      | [105]     | 100    | 0      | 0      |
| <i>Hymenophyllum silveirae</i>     | <i>Hymenophyllum silveirae</i>    | [169]     | 33     | 33     | 34     |
| <i>Hymenophyllum simonsianum</i>   | <i>Hymenophyllum simonsianum</i>  | [165]     | 50     | 50     | 0      |
| <i>Hymenophyllum simonsianum</i>   | <i>Hymenophyllum simonsianum</i>  | [53]      | 33     | 33     | 34     |
| <i>Hymenophyllum soriemersum</i>   | <i>Hymenophyllum soriemersum</i>  | [188]     | 33     | 33     | 34     |
| <i>Hymenophyllum splendidum</i>    | <i>Hymenophyllum splendidum</i>   | [83]      | 50     | 50     | 0      |
| <i>Hymenophyllum splendidum</i>    | <i>Hymenophyllum splendidum</i>   | [71]      | 50     | 50     | 0      |
| <i>Hymenophyllum splendidum</i>    | <i>Hymenophyllum splendidum</i>   | [92]      | 50     | 50     | 0      |
| <i>Hymenophyllum splendidum</i>    | <i>Hymenophyllum splendidum</i>   | [170]     | 67     | 33     | 0      |
| <i>Hymenophyllum splendidum</i>    | <i>Sphaerocionium splendidum</i>  | [65]      | 67     | 33     | 0      |
| <i>Hymenophyllum splendidum</i>    | <i>Hymenophyllum splendidum</i>   | [66]      | 50     | 50     | 0      |
| <i>Hymenophyllum splendidum</i>    | <i>Hymenophyllum splendidum</i>   | [73]      | 50     | 50     | 0      |
| <i>Hymenophyllum stenocladum</i>   | <i>Hymenophyllum stenocladum</i>  | [61]      | 0      | 100    | 0      |
| <i>Hymenophyllum subrigidum</i>    | <i>Hymenophyllum subrigidum</i>   | [18]      | 100    | 0      | 0      |
| <i>Hymenophyllum subrigidum</i>    | <i>Hymenophyllum subrigidum</i>   | [91]      | 100    | 0      | 0      |
| <i>Hymenophyllum subrigidum</i>    | <i>Hymenophyllum subrigidum</i>   | [36]      | 100    | 0      | 0      |
| <i>Hymenophyllum subrigidum</i>    | <i>Hymenophyllum subrigidum</i>   | [43]      | 100    | 0      | 0      |
| <i>Hymenophyllum subrigidum</i>    | <i>Hymenophyllum subrigidum</i>   | [94]      | 100    | 0      | 0      |
| <i>Hymenophyllum subrigidum</i>    | <i>Hymenophyllum subrigidum</i>   | [106]     | 0      | 50     | 50     |
| <i>Hymenophyllum subrigidum</i>    | <i>Hymenophyllum subrigidum</i>   | [105]     | 100    | 0      | 0      |
| <i>Hymenophyllum talamancanum</i>  | <i>Hymenophyllum talamancanum</i> | [201]     | 100    | 0      | 0      |
| <i>Hymenophyllum talamancanum</i>  | <i>Hymenophyllum talamancanum</i> | [105]     | 100    | 0      | 0      |
| <i>Hymenophyllum tarapotense</i>   | <i>Hymenophyllum tarapotense</i>  | [157]     | 100    | 0      | 0      |
| <i>Hymenophyllum tegularis</i>     | <i>Hymenophyllum tegularis</i>    | [175]     | 100    | 0      | 0      |
| <i>Hymenophyllum tegularis</i>     | <i>Hymenophyllum tegularis</i>    | [18]      | 100    | 0      | 0      |
| <i>Hymenophyllum tegularis</i>     | <i>Hymenophyllum tegularis</i>    | [44]      | 100    | 0      | 0      |
| <i>Hymenophyllum tegularis</i>     | <i>Hymenophyllum tegularis</i>    | [36]      | 100    | 0      | 0      |
| <i>Hymenophyllum tegularis</i>     | <i>Hymenophyllum tegularis</i>    | [43]      | 100    | 0      | 0      |
| <i>Hymenophyllum tegularis</i>     | <i>Hymenophyllum tegularis</i>    | [155]     | 100    | 0      | 0      |
| <i>Hymenophyllum tegularis</i>     | <i>Hymenophyllum tegularis</i>    | [105]     | 100    | 0      | 0      |
| <i>Hymenophyllum thuidium</i>      | <i>Hymenophyllum thuidium</i>     | [62]      | 100    | 0      | 0      |
| <i>Hymenophyllum tomaniiviense</i> | <i>Trichomanes tomaiivense</i>    | [57]      | 100    | 0      | 0      |
| <i>Hymenophyllum tomentosum</i>    | <i>Hymenophyllum tomentosum</i>   | [36]      | 100    | 0      | 0      |
| <i>Hymenophyllum tortuosum</i>     | <i>Hymenophyllum tortuosum</i>    | [171]     | 85     | 7.5    | 7.5    |
| <i>Hymenophyllum tortuosum</i>     | <i>Hymenophyllum tortuosum</i>    | [167]     | 50     | 0      | 50     |
| <i>Hymenophyllum tortuosum</i>     | <i>Hymenophyllum tortuosum</i>    | [168]     | 0      | 100    | 0      |
| <i>Hymenophyllum trapezoidale</i>  | <i>Hymenophyllum trapezoidale</i> | [145]     | 100    | 0      | 0      |
| <i>Hymenophyllum trapezoidale</i>  | <i>Hymenophyllum trapezoidale</i> | [22]      | 100    | 0      | 0      |
| <i>Hymenophyllum trapezoidale</i>  | <i>Hymenophyllum trapezoidale</i> | [175]     | 100    | 0      | 0      |
| <i>Hymenophyllum trapezoidale</i>  | <i>Hymenophyllum trapezoidale</i> | [18]      | 100    | 0      | 0      |
| <i>Hymenophyllum trapezoidale</i>  | <i>Hymenophyllum trapezoidale</i> | [44]      | 100    | 0      | 0      |
| <i>Hymenophyllum trapezoidale</i>  | <i>Hymenophyllum trapezoidale</i> | [36]      | 50     | 0      | 50     |
| <i>Hymenophyllum trapezoidale</i>  | <i>Hymenophyllum trapezoidale</i> | [43]      | 100    | 0      | 0      |
| <i>Hymenophyllum trapezoidale</i>  | <i>Hymenophyllum trapezoidale</i> | [155]     | 100    | 0      | 0      |
| <i>Hymenophyllum trapezoidale</i>  | <i>Hymenophyllum trapezoidale</i> | [96]      | 100    | 0      | 0      |
| <i>Hymenophyllum trapezoidale</i>  | <i>Hymenophyllum trapezoidale</i> | [105]     | 100    | 0      | 0      |

| Valid species name                  | Species name in source              | Reference | EV (%) | LV (%) | TV (%) |
|-------------------------------------|-------------------------------------|-----------|--------|--------|--------|
| <i>Hymenophyllum treubii</i>        | <i>Hymenophyllum treubii</i>        | [62]      | 100    | 0      | 0      |
| <i>Hymenophyllum treubii</i>        | <i>Hymenophyllum treubii</i>        | [75]      | 100    | 0      | 0      |
| <i>Hymenophyllum triangulare</i>    | <i>Hymenophyllum triangulare</i>    | [83]      | 100    | 0      | 0      |
| <i>Hymenophyllum triangulare</i>    | <i>Hymenophyllum triangulare</i>    | [71]      | 100    | 0      | 0      |
| <i>Hymenophyllum triangulare</i>    | <i>Hymenophyllum triangulare</i>    | [170]     | 100    | 0      | 0      |
| <i>Hymenophyllum triangulare</i>    | <i>Meringium triangulare</i>        | [65]      | 100    | 0      | 0      |
| <i>Hymenophyllum triangulare</i>    | <i>Hymenophyllum triangulare</i>    | [73]      | 100    | 0      | 0      |
| <i>Hymenophyllum triangulare</i>    | <i>Hymenophyllum triangulare</i>    | [100]     | 95     | 5      | 0      |
| <i>Hymenophyllum trichomanoides</i> | <i>Hymenophyllum trichomanoides</i> | [36]      | 50     | 0      | 50     |
| <i>Hymenophyllum trichomanoides</i> | <i>Hymenophyllum trichomanoides</i> | [43]      | 95     | 0      | 5      |
| <i>Hymenophyllum trichomanoides</i> | <i>Hymenophyllum trichomanoides</i> | [29]      | 100    | 0      | 0      |
| <i>Hymenophyllum trichophorum</i>   | <i>Hymenophyllum trichophorum</i>   | [62]      | 100    | 0      | 0      |
| <i>Hymenophyllum trichophyllum</i>  | <i>Hymenophyllum trichophyllum</i>  | [22]      | 50     | 50     | 0      |
| <i>Hymenophyllum trichophyllum</i>  | <i>Hymenophyllum trichophyllum</i>  | [18]      | 100    | 0      | 0      |
| <i>Hymenophyllum trichophyllum</i>  | <i>Hymenophyllum trichophyllum</i>  | [169]     | 0      | 100    | 0      |
| <i>Hymenophyllum trichophyllum</i>  | <i>Hymenophyllum trichophyllum</i>  | [36]      | 50     | 50     | 0      |
| <i>Hymenophyllum trichophyllum</i>  | <i>Hymenophyllum trichophyllum</i>  | [43]      | 50     | 50     | 0      |
| <i>Hymenophyllum trichophyllum</i>  | <i>Hymenophyllum trichophyllum</i>  | [94]      | 100    | 0      | 0      |
| <i>Hymenophyllum trichophyllum</i>  | <i>Hymenophyllum trichophyllum</i>  | [29]      | 50     | 50     | 0      |
| <i>Hymenophyllum trichophyllum</i>  | <i>Hymenophyllum trichophyllum</i>  | [157]     | 100    | 0      | 0      |
| <i>Hymenophyllum trichophyllum</i>  | <i>Hymenophyllum trichophyllum</i>  | [26]      | 100    | 0      | 0      |
| <i>Hymenophyllum trichophyllum</i>  | <i>Hymenophyllum trichophyllum</i>  | [105]     | 100    | 0      | 0      |
| <i>Hymenophyllum tunbrigense</i>    | <i>Hymenophyllum tunbrigense</i>    | [145]     | 100    | 0      | 0      |
| <i>Hymenophyllum tunbrigense</i>    | <i>Hymenophyllum tunbrigense</i>    | [45]      | 100    | 0      | 0      |
| <i>Hymenophyllum tunbrigense</i>    | <i>Hymenophyllum tunbrigense</i>    | [146]     | 0      | 100    | 0      |
| <i>Hymenophyllum tunbrigense</i>    | <i>Hymenophyllum tunbrigense</i>    | [83]      | 85     | 15     | 0      |
| <i>Hymenophyllum tunbrigense</i>    | <i>Hymenophyllum tunbrigense</i>    | [175]     | 100    | 0      | 0      |
| <i>Hymenophyllum tunbrigense</i>    | <i>Hymenophyllum tunbrigense</i>    | [171]     | 5      | 0      | 95     |
| <i>Hymenophyllum tunbrigense</i>    | <i>Hymenophyllum tunbrigense</i>    | [44]      | 33.3   | 33.3   | 33.4   |
| <i>Hymenophyllum tunbrigense</i>    | <i>Hymenophyllum tunbrigense</i>    | [161]     | 50     | 50     | 0      |
| <i>Hymenophyllum tunbrigense</i>    | <i>Hymenophyllum tunbrigense</i>    | [91]      | 100    | 0      | 0      |
| <i>Hymenophyllum tunbrigense</i>    | <i>Hymenophyllum tunbrigense</i>    | [36]      | 100    | 0      | 0      |
| <i>Hymenophyllum tunbrigense</i>    | <i>Hymenophyllum tunbrigense</i>    | [92]      | 33.3   | 33.3   | 33.4   |
| <i>Hymenophyllum tunbrigense</i>    | <i>Hymenophyllum tunbrigense</i>    | [167]     | 0      | 0      | 100    |
| <i>Hymenophyllum tunbrigense</i>    | <i>Hymenophyllum asperulum</i>      | [174]     | 33     | 33     | 34     |
| <i>Hymenophyllum tunbrigense</i>    | <i>Hymenophyllum tunbrigense</i>    | [150]     | 0      | 100    | 0      |
| <i>Hymenophyllum tunbrigense</i>    | <i>Hymenophyllum tunbrigense</i>    | [94]      | 100    | 0      | 0      |
| <i>Hymenophyllum tunbrigense</i>    | <i>Hymenophyllum tunbrigense</i>    | [202]     | 5      | 85     | 10     |
| <i>Hymenophyllum tunbrigense</i>    | <i>Hymenophyllum tunbrigense</i>    | [203]     | 50     | 50     | 0      |
| <i>Hymenophyllum tunbrigense</i>    | <i>Hymenophyllum tunbrigense</i>    | [66]      | 33     | 33     | 34     |
| <i>Hymenophyllum tunbrigense</i>    | <i>Hymenophyllum tunbrigense</i>    | [67]      | 33     | 33     | 34     |
| <i>Hymenophyllum tunbrigense</i>    | <i>Hymenophyllum tunbrigense</i>    | [100]     | 100    | 0      | 0      |
| <i>Hymenophyllum tunbrigense</i>    | <i>Hymenophyllum tunbrigense</i>    | [204]     | 85     | 0      | 15     |
| <i>Hymenophyllum tunbrigense</i>    | <i>Hymenophyllum tunbrigense</i>    | [105]     | 100    | 0      | 0      |
| <i>Hymenophyllum tunbrigense</i>    | <i>Hymenophyllum tunbrigense</i>    | [205]     | 15     | 85     | 0      |
| <i>Hymenophyllum turquinense</i>    | <i>Hymenophyllum turquinense</i>    | [198]     | 100    | 0      | 0      |
| <i>Hymenophyllum umbratile</i>      | <i>Hymenophyllum umbratile</i>      | [171]     | 100    | 0      | 0      |
| <i>Hymenophyllum umbratile</i>      | <i>Hymenophyllum umbratile</i>      | [167]     | 50     | 0      | 50     |
| <i>Hymenophyllum undulatum</i>      | <i>Hymenophyllum undulatum</i>      | [46]      | 100    | 0      | 0      |
| <i>Hymenophyllum undulatum</i>      | <i>Hymenophyllum undulatum</i>      | [22]      | 100    | 0      | 0      |
| <i>Hymenophyllum undulatum</i>      | <i>Hymenophyllum undulatum</i>      | [86]      | 100    | 0      | 0      |

| Valid species name                | Species name in source            | Reference | EV (%) | LV (%) | TV (%) |
|-----------------------------------|-----------------------------------|-----------|--------|--------|--------|
| <i>Hymenophyllum undulatum</i>    | <i>Hymenophyllum undulatum</i>    | [18]      | 100    | 0      | 0      |
| <i>Hymenophyllum undulatum</i>    | <i>Hymenophyllum undulatum</i>    | [44]      | 100    | 0      | 0      |
| <i>Hymenophyllum undulatum</i>    | <i>Hymenophyllum undulatum</i>    | [36]      | 50     | 50     | 0      |
| <i>Hymenophyllum undulatum</i>    | <i>Hymenophyllum undulatum</i>    | [43]      | 50     | 50     | 0      |
| <i>Hymenophyllum undulatum</i>    | <i>Hymenophyllum undulatum</i>    | [94]      | 33.3   | 33.4   | 33.3   |
| <i>Hymenophyllum undulatum</i>    | <i>Hymenophyllum undulatum</i>    | [26]      | 100    | 0      | 0      |
| <i>Hymenophyllum undulatum</i>    | <i>Hymenophyllum undulatum</i>    | [105]     | 50     | 0      | 50     |
| <i>Hymenophyllum valvatum</i>     | <i>Hymenophyllum valvatum</i>     | [22]      | 50     | 50     | 0      |
| <i>Hymenophyllum valvatum</i>     | <i>Hymenophyllum valvatum</i>     | [86]      | 100    | 0      | 0      |
| <i>Hymenophyllum valvatum</i>     | <i>Hymenophyllum valvatum</i>     | [36]      | 100    | 0      | 0      |
| <i>Hymenophyllum valvatum</i>     | <i>Hymenophyllum valvatum</i>     | [43]      | 100    | 0      | 0      |
| <i>Hymenophyllum valvatum</i>     | <i>Hymenophyllum valvatum</i>     | [29]      | 100    | 0      | 0      |
| <i>Hymenophyllum verecundum</i>   | <i>Hymenophyllum verecundum</i>   | [43]      | 85     | 0      | 15     |
| <i>Hymenophyllum veronicoides</i> | <i>Hymenophyllum veronicoides</i> | [56]      | 0      | 100    | 0      |
| <i>Hymenophyllum vestitum</i>     | <i>Hymenophyllum vestitum</i>     | [22]      | 33     | 34     | 33     |
| <i>Hymenophyllum vestitum</i>     | <i>Hymenophyllum elatius</i>      | [169]     | 50     | 0      | 50     |
| <i>Hymenophyllum vestitum</i>     | <i>Hymenophyllum vestitum</i>     | [101]     | 50     | 50     | 0      |
| <i>Hymenophyllum villosum</i>     | <i>Hymenophyllum villosum</i>     | [159]     | 85     | 7.5    | 7.5    |
| <i>Hymenophyllum villosum</i>     | <i>Hymenophyllum villosum</i>     | [160]     | 50     | 0      | 50     |
| <i>Hymenophyllum villosum</i>     | <i>Hymenophyllum villosum</i>     | [106]     | 0      | 50     | 50     |
| <i>Hymenophyllum walleri</i>      | <i>Hymenophyllum walleri</i>      | [117]     | 50     | 50     | 0      |
| <i>Hymenophyllum whitei</i>       | <i>Hymenophyllum whitei</i>       | [117]     | 50     | 50     | 0      |
| <i>Hymenophyllum wilsonii</i>     | <i>Hymenophyllum wilsonii</i>     | [206]     | 66.6   | 33.4   | 0      |
| <i>Hymenophyllum wilsonii</i>     | <i>Hymenophyllum wilsonii</i>     | [202]     | 5      | 85     | 10     |
| <i>Hymenophyllum wilsonii</i>     | <i>Hymenophyllum wilsonii</i>     | [203]     | 45     | 45     | 10     |
| <i>Hymenophyllum wilsonii</i>     | <i>Hymenophyllum wilsonii</i>     | [207]     | 100    | 0      | 0      |
| <i>Hymenophyllum wilsonii</i>     | <i>Hymenophyllum wilsonii</i>     | [204]     | 100    | 0      | 0      |
| <i>Hymenophyllum wilsonii</i>     | <i>Hymenophyllum wilsonii</i>     | [208]     | 100    | 0      | 0      |
| <i>Hymenophyllum wilsonii</i>     | <i>Hymenophyllum wilsonii</i>     | [205]     | 33     | 67     | 0      |
| <i>Hymenophyllum wrightii</i>     | <i>Hymenophyllum wrightii</i>     | [209]     | 50     | 50     | 0      |
| <i>Hymenophyllum wrightii</i>     | <i>Hymenophyllum wrightii</i>     | [150]     | 33.3   | 33.3   | 33.4   |
| <i>Hymenophyllum wrightii</i>     | <i>Hymenophyllum wrightii</i>     | [61]      | 50     | 50     | 0      |
| <i>Polyphlebium angustatum</i>    | <i>Polyphlebium angustatum</i>    | [146]     | 0      | 50     | 50     |
| <i>Polyphlebium angustatum</i>    | <i>Polyphlebium angustatum</i>    | [84]      | 85     | 0      | 15     |
| <i>Polyphlebium angustatum</i>    | <i>Polyphlebium angustatum</i>    | [22]      | 50     | 50     | 0      |
| <i>Polyphlebium angustatum</i>    | <i>Trichomanes angustatum</i>     | [87]      | 100    | 0      | 0      |
| <i>Polyphlebium angustatum</i>    | <i>Trichomanes angustatum</i>     | [20]      | 100    | 0      | 0      |
| <i>Polyphlebium angustatum</i>    | <i>Polyphlebium angustatum</i>    | [44]      | 100    | 0      | 0      |
| <i>Polyphlebium angustatum</i>    | <i>Polyphlebium angustatum</i>    | [88]      | 100    | 0      | 0      |
| <i>Polyphlebium angustatum</i>    | <i>Polyphlebium angustatum</i>    | [89]      | 100    | 0      | 0      |
| <i>Polyphlebium angustatum</i>    | <i>Polyphlebium angustatum</i>    | [36]      | 50     | 50     | 0      |
| <i>Polyphlebium angustatum</i>    | <i>Trichomanes angustatum</i>     | [36]      | 50     | 50     | 0      |
| <i>Polyphlebium angustatum</i>    | <i>Polyphlebium angustatum</i>    | [43]      | 50     | 25     | 25     |
| <i>Polyphlebium angustatum</i>    | <i>Trichomanes angustatum</i>     | [94]      | 100    | 0      | 0      |
| <i>Polyphlebium angustatum</i>    | <i>Trichomanes angustatum</i>     | [210]     | 50     | 50     | 0      |
| <i>Polyphlebium angustatum</i>    | <i>Polyphlebium angustatum</i>    | [133]     | 100    | 0      | 0      |
| <i>Polyphlebium angustatum</i>    | <i>Polyphlebium angustatum</i>    | [97]      | 100    | 0      | 0      |
| <i>Polyphlebium angustatum</i>    | <i>Polyphlebium angustatum</i>    | [56]      | 0      | 100    | 0      |
| <i>Polyphlebium angustatum</i>    | <i>Polyphlebium angustatum</i>    | [101]     | 85     | 15     | 0      |
| <i>Polyphlebium borbonicum</i>    | <i>Polyphlebium borbonicum</i>    | [83]      | 15     | 85     | 0      |
| <i>Polyphlebium borbonicum</i>    | <i>Polyphlebium borbonicum</i>    | [125]     | 50     | 50     | 0      |

| Valid species name               | Species name in source           | Reference | EV (%) | LV (%) | TV (%) |
|----------------------------------|----------------------------------|-----------|--------|--------|--------|
| <i>Polyphlebiium borbonicum</i>  | <i>Polyphlebiium borbonicum</i>  | [92]      | 50     | 50     | 0      |
| <i>Polyphlebiium borbonicum</i>  | <i>Polyphlebiium borbonicum</i>  | [43]      | 50     | 25     | 25     |
| <i>Polyphlebiium borbonicum</i>  | <i>Polyphlebiium borbonicum</i>  | [66]      | 50     | 50     | 0      |
| <i>Polyphlebiium borbonicum</i>  | <i>Polyphlebiium borbonicum</i>  | [67]      | 0      | 100    | 0      |
| <i>Polyphlebiium borbonicum</i>  | <i>Polyphlebiium borbonicum</i>  | [56]      | 100    | 0      | 0      |
| <i>Polyphlebiium borbonicum</i>  | <i>Polyphlebiium borbonicum</i>  | [82]      | 50     | 50     | 0      |
| <i>Polyphlebiium borbonicum</i>  | <i>Polyphlebiium borbonicum</i>  | [39]      | 50     | 50     | 0      |
| <i>Polyphlebiium borbonicum</i>  | <i>Trichomanes borbonicum</i>    | [100]     | 33     | 67     | 0      |
| <i>Polyphlebiium capillaceum</i> | <i>Polyphlebiium capillaceum</i> | [22]      | 100    | 0      | 0      |
| <i>Polyphlebiium capillaceum</i> | <i>Polyphlebiium capillaceum</i> | [175]     | 100    | 0      | 0      |
| <i>Polyphlebiium capillaceum</i> | <i>Trichomanes capillaceum</i>   | [18]      | 100    | 0      | 0      |
| <i>Polyphlebiium capillaceum</i> | <i>Trichomanes capillaceum</i>   | [20]      | 100    | 0      | 0      |
| <i>Polyphlebiium capillaceum</i> | <i>Polyphlebiium capillaceum</i> | [44]      | 100    | 0      | 0      |
| <i>Polyphlebiium capillaceum</i> | <i>Polyphlebiium capillaceum</i> | [91]      | 100    | 0      | 0      |
| <i>Polyphlebiium capillaceum</i> | <i>Polyphlebiium capillaceum</i> | [36]      | 33.3   | 33.3   | 33.4   |
| <i>Polyphlebiium capillaceum</i> | <i>Trichomanes capillaceum</i>   | [36]      | 33.3   | 33.3   | 33.4   |
| <i>Polyphlebiium capillaceum</i> | <i>Polyphlebiium capillaceum</i> | [43]      | 50     | 25     | 25     |
| <i>Polyphlebiium capillaceum</i> | <i>Trichomanes capillaceum</i>   | [94]      | 100    | 0      | 0      |
| <i>Polyphlebiium capillaceum</i> | <i>Trichomanes capillaceum</i>   | [155]     | 100    | 0      | 0      |
| <i>Polyphlebiium capillaceum</i> | <i>Polyphlebiium capillaceum</i> | [96]      | 100    | 0      | 0      |
| <i>Polyphlebiium capillaceum</i> | <i>Trichomanes capillaceum</i>   | [98]      | 50     | 0      | 50     |
| <i>Polyphlebiium capillaceum</i> | <i>Trichomanes capillaceum</i>   | [147]     | 100    | 0      | 0      |
| <i>Polyphlebiium capillaceum</i> | <i>Trichomanes capillaceum</i>   | [105]     | 100    | 0      | 0      |
| <i>Polyphlebiium colensoi</i>    | <i>Trichomanes colensoi</i>      | [68]      | 0      | 0      | 100    |
| <i>Polyphlebiium colensoi</i>    | <i>Trichomanes colensoi</i>      | [20]      | 100    | 0      | 0      |
| <i>Polyphlebiium colensoi</i>    | <i>Polyphlebiium colensoi</i>    | [160]     | 15     | 0      | 85     |
| <i>Polyphlebiium diaphanum</i>   | <i>Trichomanes borbonicum</i>    | [71]      | 50     | 50     | 0      |
| <i>Polyphlebiium diaphanum</i>   | <i>Polyphlebiium diaphanum</i>   | [84]      | 85     | 0      | 15     |
| <i>Polyphlebiium diaphanum</i>   | <i>Polyphlebiium diaphanum</i>   | [22]      | 50     | 50     | 0      |
| <i>Polyphlebiium diaphanum</i>   | <i>Trichomanes diaphanum</i>     | [18]      | 100    | 0      | 0      |
| <i>Polyphlebiium diaphanum</i>   | <i>Trichomanes diaphanum</i>     | [87]      | 100    | 0      | 0      |
| <i>Polyphlebiium diaphanum</i>   | <i>Trichomanes diaphanum</i>     | [20]      | 100    | 0      | 0      |
| <i>Polyphlebiium diaphanum</i>   | <i>Trichomanes borbonicum</i>    | [20]      | 100    | 0      | 0      |
| <i>Polyphlebiium diaphanum</i>   | <i>Polyphlebiium diaphanum</i>   | [88]      | 100    | 0      | 0      |
| <i>Polyphlebiium diaphanum</i>   | <i>Polyphlebiium diaphanum</i>   | [89]      | 0      | 100    | 0      |
| <i>Polyphlebiium diaphanum</i>   | <i>Polyphlebiium diaphanum</i>   | [90]      | 85     | 15     | 0      |
| <i>Polyphlebiium diaphanum</i>   | <i>Polyphlebiium diaphanum</i>   | [91]      | 100    | 0      | 0      |
| <i>Polyphlebiium diaphanum</i>   | <i>Polyphlebiium diaphanum</i>   | [36]      | 50     | 50     | 0      |
| <i>Polyphlebiium diaphanum</i>   | <i>Trichomanes debile</i>        | [36]      | 50     | 50     | 0      |
| <i>Polyphlebiium diaphanum</i>   | <i>Trichomanes diaphanum</i>     | [36]      | 33.3   | 33.3   | 33.4   |
| <i>Polyphlebiium diaphanum</i>   | <i>Polyphlebiium diaphanum</i>   | [43]      | 47.5   | 5      | 47.5   |
| <i>Polyphlebiium diaphanum</i>   | <i>Trichomanes diaphanum</i>     | [94]      | 100    | 0      | 0      |
| <i>Polyphlebiium diaphanum</i>   | <i>Trichomanes diaphanum</i>     | [29]      | 50     | 50     | 0      |
| <i>Polyphlebiium diaphanum</i>   | <i>Polyphlebiium diaphanum</i>   | [133]     | 100    | 0      | 0      |
| <i>Polyphlebiium diaphanum</i>   | <i>Trichomanes diaphanum</i>     | [95]      | 100    | 0      | 0      |
| <i>Polyphlebiium diaphanum</i>   | <i>Polyphlebiium diaphanum</i>   | [96]      | 50     | 50     | 0      |
| <i>Polyphlebiium diaphanum</i>   | <i>Vandenboschia borbonica</i>   | [65]      | 100    | 0      | 0      |
| <i>Polyphlebiium diaphanum</i>   | <i>Trichomanes borbonicum</i>    | [73]      | 100    | 0      | 0      |
| <i>Polyphlebiium diaphanum</i>   | <i>Trichomanes diaphanum</i>     | [103]     | 100    | 0      | 0      |
| <i>Polyphlebiium diaphanum</i>   | <i>Polyphlebiium diaphanum</i>   | [104]     | 100    | 0      | 0      |
| <i>Polyphlebiium diaphanum</i>   | <i>Trichomanes diaphanum</i>     | [105]     | 100    | 0      | 0      |



| Valid species name                    | Species name in source                | Reference | EV (%) | LV (%) | TV (%) |
|---------------------------------------|---------------------------------------|-----------|--------|--------|--------|
| <i>Polyphlebiium endlicherianum</i>   | <i>Trichomanes endlicherianum</i>     | [57]      | 50     | 0      | 50     |
| <i>Polyphlebiium endlicherianum</i>   | <i>Trichomanes endlicherianum</i>     | [68]      | 0      | 100    | 0      |
| <i>Polyphlebiium endlicherianum</i>   | <i>Trichomanes endlicherianum</i>     | [20]      | 100    | 0      | 0      |
| <i>Polyphlebiium endlicherianum</i>   | <i>Polyphlebiium endlicherianum</i>   | [60]      | 100    | 0      | 0      |
| <i>Polyphlebiium endlicherianum</i>   | <i>Polyphlebiium endlicherianum</i>   | [39]      | 50     | 50     | 0      |
| <i>Polyphlebiium exsectum</i>         | <i>Polyphlebiium exsectum</i>         | [171]     | 50     | 50     | 0      |
| <i>Polyphlebiium herzogii</i>         | <i>Polyphlebiium herzogii</i>         | [43]      | 100    | 0      | 0      |
| <i>Polyphlebiium hymenophylloides</i> | <i>Polyphlebiium hymenophylloides</i> | [145]     | 100    | 0      | 0      |
| <i>Polyphlebiium hymenophylloides</i> | <i>Polyphlebiium hymenophylloides</i> | [45]      | 100    | 0      | 0      |
| <i>Polyphlebiium hymenophylloides</i> | <i>Trichomanes hymenophylloides</i>   | [46]      | 100    | 0      | 0      |
| <i>Polyphlebiium hymenophylloides</i> | <i>Polyphlebiium hymenophylloides</i> | [22]      | 100    | 0      | 0      |
| <i>Polyphlebiium hymenophylloides</i> | <i>Polyphlebiium hymenophylloides</i> | [175]     | 100    | 0      | 0      |
| <i>Polyphlebiium hymenophylloides</i> | <i>Polyphlebiium hymenophylloides</i> | [85]      | 50     | 0      | 50     |
| <i>Polyphlebiium hymenophylloides</i> | <i>Polyphlebiium hymenophylloides</i> | [86]      | 100    | 0      | 0      |
| <i>Polyphlebiium hymenophylloides</i> | <i>Trichomanes hymenophylloides</i>   | [18]      | 100    | 0      | 0      |
| <i>Polyphlebiium hymenophylloides</i> | <i>Trichomanes hymenophylloides</i>   | [20]      | 100    | 0      | 0      |
| <i>Polyphlebiium hymenophylloides</i> | <i>Polyphlebiium hymenophylloides</i> | [44]      | 50     | 0      | 50     |
| <i>Polyphlebiium hymenophylloides</i> | <i>Polyphlebiium hymenophylloides</i> | [89]      | 100    | 0      | 0      |
| <i>Polyphlebiium hymenophylloides</i> | <i>Polyphlebiium hymenophylloides</i> | [91]      | 100    | 0      | 0      |
| <i>Polyphlebiium hymenophylloides</i> | <i>Polyphlebiium hymenophylloides</i> | [36]      | 50     | 50     | 0      |
| <i>Polyphlebiium hymenophylloides</i> | <i>Trichomanes hymenophylloides</i>   | [36]      | 50     | 50     | 0      |
| <i>Polyphlebiium hymenophylloides</i> | <i>Trichomanes hymenophylloides</i>   | [94]      | 100    | 0      | 0      |
| <i>Polyphlebiium hymenophylloides</i> | <i>Polyphlebiium hymenophylloides</i> | [133]     | 100    | 0      | 0      |
| <i>Polyphlebiium hymenophylloides</i> | <i>Trichomanes hymenophylloides</i>   | [105]     | 100    | 0      | 0      |
| <i>Polyphlebiium pyxidiferum</i>      | <i>Crepidomanes pyxidiferum</i>       | [146]     | 100    | 0      | 0      |
| <i>Polyphlebiium pyxidiferum</i>      | <i>Crepidomanes pyxidiferum</i>       | [71]      | 85     | 15     | 0      |
| <i>Polyphlebiium pyxidiferum</i>      | <i>Polyphlebiium pyxidiferum</i>      | [84]      | 85     | 0      | 15     |
| <i>Polyphlebiium pyxidiferum</i>      | <i>Polyphlebiium pyxidiferum</i>      | [22]      | 50     | 50     | 0      |
| <i>Polyphlebiium pyxidiferum</i>      | <i>Polyphlebiium pyxidiferum</i>      | [175]     | 100    | 0      | 0      |
| <i>Polyphlebiium pyxidiferum</i>      | <i>Crepidomanes pyxidiferum</i>       | [115]     | 100    | 0      | 0      |
| <i>Polyphlebiium pyxidiferum</i>      | <i>Crepidomanes pyxidiferum</i>       | [18]      | 50     | 0      | 50     |
| <i>Polyphlebiium pyxidiferum</i>      | <i>Crepidomanes pyxidiferum</i>       | [87]      | 100    | 0      | 0      |
| <i>Polyphlebiium pyxidiferum</i>      | <i>Crepidomanes pyxidiferum</i>       | [20]      | 100    | 0      | 0      |
| <i>Polyphlebiium pyxidiferum</i>      | <i>Polyphlebiium pyxidiferum</i>      | [44]      | 50     | 0      | 50     |
| <i>Polyphlebiium pyxidiferum</i>      | <i>Polyphlebiium pyxidiferum</i>      | [88]      | 100    | 0      | 0      |
| <i>Polyphlebiium pyxidiferum</i>      | <i>Polyphlebiium pyxidiferum</i>      | [89]      | 100    | 0      | 0      |
| <i>Polyphlebiium pyxidiferum</i>      | <i>Trichomanes emarginatum</i>        | [89]      | 100    | 0      | 0      |
| <i>Polyphlebiium pyxidiferum</i>      | <i>Polyphlebiium pyxidiferum</i>      | [36]      | 100    | 0      | 0      |
| <i>Polyphlebiium pyxidiferum</i>      | <i>Crepidomanes pyxidiferum</i>       | [36]      | 100    | 0      | 0      |
| <i>Polyphlebiium pyxidiferum</i>      | <i>Crepidomanes pyxidiferum</i>       | [43]      | 100    | 0      | 0      |
| <i>Polyphlebiium pyxidiferum</i>      | <i>Crepidomanes pyxidiferum</i>       | [94]      | 95     | 5      | 0      |
| <i>Polyphlebiium pyxidiferum</i>      | <i>Crepidomanes pyxidiferum</i>       | [155]     | 100    | 0      | 0      |
| <i>Polyphlebiium pyxidiferum</i>      | <i>Polyphlebiium pyxidiferum</i>      | [97]      | 100    | 0      | 0      |
| <i>Polyphlebiium pyxidiferum</i>      | <i>Crepidomanes pyxidiferum</i>       | [211]     | 85     | 15     | 0      |
| <i>Polyphlebiium pyxidiferum</i>      | <i>Crepidomanes pyxidiferum</i>       | [98]      | 50     | 0      | 50     |
| <i>Polyphlebiium pyxidiferum</i>      | <i>Polyphlebiium pyxidiferum</i>      | [101]     | 15     | 85     | 0      |
| <i>Polyphlebiium venosum</i>          | <i>Polyphlebiium venosum</i>          | [162]     | 100    | 0      | 0      |
| <i>Polyphlebiium venosum</i>          | <i>Trichomanes venosum</i>            | [68]      | 100    | 0      | 0      |
| <i>Polyphlebiium venosum</i>          | <i>Polyphlebiium venosum</i>          | [212]     | 100    | 0      | 0      |
| <i>Polyphlebiium venosum</i>          | <i>Trichomanes venosum</i>            | [20]      | 100    | 0      | 0      |
| <i>Polyphlebiium venosum</i>          | <i>Polyphlebiium venosum</i>          | [117]     | 100    | 0      | 0      |

| Valid species name               | Species name in source         | Reference | EV (%) | LV (%) | TV (%) |
|----------------------------------|--------------------------------|-----------|--------|--------|--------|
| <i>Polyphlebiium venosum</i>     | <i>Polyphlebiium venosum</i>   | [163]     | 100    | 0      | 0      |
| <i>Polyphlebiium venosum</i>     | <i>Polyphlebiium venosum</i>   | [159]     | 85     | 7.5    | 7.5    |
| <i>Polyphlebiium venosum</i>     | <i>Polyphlebiium venosum</i>   | [106]     | 100    | 0      | 0      |
| <i>Polyphlebiium vieillardii</i> | <i>Trichomanes vieillardii</i> | [20]      | 100    | 0      | 0      |
| <i>Polyphlebiium werneri</i>     | <i>Polyphlebiium werneri</i>   | [62]      | 100    | 0      | 0      |
| <i>Trichomanes accedens</i>      | <i>Trichomanes accedens</i>    | [22]      | 50     | 0      | 50     |
| <i>Trichomanes accedens</i>      | <i>Trichomanes accedens</i>    | [20]      | 0      | 0      | 100    |
| <i>Trichomanes accedens</i>      | <i>Trichomanes accedens</i>    | [36]      | 33.3   | 33.3   | 33.4   |
| <i>Trichomanes accedens</i>      | <i>Trichomanes accedens</i>    | [43]      | 0      | 50     | 50     |
| <i>Trichomanes accedens</i>      | <i>Trichomanes accedens</i>    | [29]      | 100    | 0      | 0      |
| <i>Trichomanes accedens</i>      | <i>Trichomanes accedens</i>    | [95]      | 100    | 0      | 0      |
| <i>Trichomanes accedens</i>      | <i>Trichomanes accedens</i>    | [213]     | 42.5   | 15     | 42.5   |
| <i>Trichomanes accedens</i>      | <i>Trichomanes accedens</i>    | [99]      | 42.5   | 15     | 42.5   |
| <i>Trichomanes alatum</i>        | <i>Trichomanes alatum</i>      | [86]      | 100    | 0      | 0      |
| <i>Trichomanes alatum</i>        | <i>Trichomanes alatum</i>      | [20]      | 0      | 0      | 100    |
| <i>Trichomanes alatum</i>        | <i>Trichomanes alatum</i>      | [36]      | 0      | 0      | 100    |
| <i>Trichomanes alatum</i>        | <i>Trichomanes alatum</i>      | [102]     | 33     | 34     | 33     |
| <i>Trichomanes anadromum</i>     | <i>Trichomanes anadromum</i>   | [84]      | 85     | 0      | 15     |
| <i>Trichomanes anadromum</i>     | <i>Trichomanes anadromum</i>   | [22]      | 100    | 0      | 0      |
| <i>Trichomanes anadromum</i>     | <i>Trichomanes anadromum</i>   | [18]      | 100    | 0      | 0      |
| <i>Trichomanes anadromum</i>     | <i>Trichomanes anadromum</i>   | [101]     | 100    | 0      | 0      |
| <i>Trichomanes ankersii</i>      | <i>Trichomanes ankersii</i>    | [18]      | 100    | 0      | 0      |
| <i>Trichomanes ankersii</i>      | <i>Trichomanes ankersii</i>    | [20]      | 0      | 100    | 0      |
| <i>Trichomanes ankersii</i>      | <i>Trichomanes ankersii</i>    | [90]      | 100    | 0      | 0      |
| <i>Trichomanes ankersii</i>      | <i>Trichomanes ankersii</i>    | [36]      | 100    | 0      | 0      |
| <i>Trichomanes ankersii</i>      | <i>Trichomanes ankersii</i>    | [43]      | 100    | 0      | 0      |
| <i>Trichomanes ankersii</i>      | <i>Trichomanes ankersii</i>    | [94]      | 100    | 0      | 0      |
| <i>Trichomanes ankersii</i>      | <i>Trichomanes ankersii</i>    | [29]      | 100    | 0      | 0      |
| <i>Trichomanes ankersii</i>      | <i>Trichomanes ankersii</i>    | [99]      | 100    | 0      | 0      |
| <i>Trichomanes anomalum</i>      | <i>Trichomanes anomalum</i>    | [20]      | 0      | 0      | 100    |
| <i>Trichomanes anomalum</i>      | <i>Trichomanes anomalum</i>    | [36]      | 0      | 50     | 50     |
| <i>Trichomanes anomalum</i>      | <i>Trichomanes anomalum</i>    | [29]      | 33     | 34     | 33     |
| <i>Trichomanes arbuscula</i>     | <i>Trichomanes arbuscula</i>   | [22]      | 33.3   | 33.3   | 33.4   |
| <i>Trichomanes arbuscula</i>     | <i>Trichomanes arbuscula</i>   | [20]      | 0      | 0      | 100    |
| <i>Trichomanes arbuscula</i>     | <i>Trichomanes arbuscula</i>   | [36]      | 33.3   | 33.3   | 33.4   |
| <i>Trichomanes arbuscula</i>     | <i>Trichomanes arbuscula</i>   | [29]      | 0      | 50     | 50     |
| <i>Trichomanes arbuscula</i>     | <i>Trichomanes arbuscula</i>   | [99]      | 34     | 33     | 33     |
| <i>Trichomanes bancroftii</i>    | <i>Trichomanes bancroftii</i>  | [20]      | 0      | 0      | 100    |
| <i>Trichomanes bancroftii</i>    | <i>Trichomanes bancroftii</i>  | [29]      | 0      | 50     | 50     |
| <i>Trichomanes bicornes</i>      | <i>Trichomanes bicornes</i>    | [22]      | 50     | 50     | 0      |
| <i>Trichomanes bicornes</i>      | <i>Trichomanes bicornes</i>    | [20]      | 0      | 0      | 100    |
| <i>Trichomanes bicornes</i>      | <i>Trichomanes bicornes</i>    | [36]      | 33.3   | 33.3   | 33.4   |
| <i>Trichomanes bicornes</i>      | <i>Trichomanes bicornes</i>    | [29]      | 0      | 50     | 50     |
| <i>Trichomanes bicornes</i>      | <i>Trichomanes bicornes</i>    | [151]     | 0      | 0      | 100    |
| <i>Trichomanes bissei</i>        | <i>Trichomanes bissei</i>      | [198]     | 0      | 0      | 100    |
| <i>Trichomanes boivinii</i>      | <i>Trichomanes boivinii</i>    | [20]      | 0      | 0      | 100    |
| <i>Trichomanes boivinii</i>      | <i>Trichomanes boivinii</i>    | [56]      | 0      | 100    | 0      |
| <i>Trichomanes boivinii</i>      | <i>Trichomanes boivinii</i>    | [82]      | 0      | 50     | 50     |
| <i>Trichomanes botryoides</i>    | <i>Trichomanes botryoides</i>  | [22]      | 50     | 0      | 50     |
| <i>Trichomanes botryoides</i>    | <i>Trichomanes botryoides</i>  | [18]      | 0      | 0      | 100    |
| <i>Trichomanes botryoides</i>    | <i>Trichomanes botryoides</i>  | [20]      | 0      | 0      | 100    |

| Valid species name              | Species name in source          | Reference | EV (%) | LV (%) | TV (%) |
|---------------------------------|---------------------------------|-----------|--------|--------|--------|
| <i>Trichomanes botryoides</i>   | <i>Trichomanes botryoides</i>   | [36]      | 50     | 0      | 50     |
| <i>Trichomanes botryoides</i>   | <i>Trichomanes botryoides</i>   | [94]      | 0      | 100    | 0      |
| <i>Trichomanes botryoides</i>   | <i>Trichomanes botryoides</i>   | [29]      | 0      | 0      | 100    |
| <i>Trichomanes caliginum</i>    | <i>Trichomanes caliginum</i>    | [20]      | 0      | 0      | 100    |
| <i>Trichomanes caliginum</i>    | <i>Trichomanes caliginum</i>    | [36]      | 0      | 50     | 50     |
| <i>Trichomanes caliginum</i>    | <i>Trichomanes caliginum</i>    | [29]      | 0      | 100    | 0      |
| <i>Trichomanes caliginum</i>    | <i>Trichomanes caliginum</i>    | [168]     | 0      | 100    | 0      |
| <i>Trichomanes crinitum</i>     | <i>Trichomanes crinitum</i>     | [22]      | 50     | 50     | 0      |
| <i>Trichomanes crinitum</i>     | <i>Trichomanes crinitum</i>     | [86]      | 100    | 0      | 0      |
| <i>Trichomanes crinitum</i>     | <i>Trichomanes crinitum</i>     | [18]      | 50     | 0      | 50     |
| <i>Trichomanes crinitum</i>     | <i>Trichomanes crinitum</i>     | [20]      | 0      | 0      | 100    |
| <i>Trichomanes crinitum</i>     | <i>Trichomanes crinitum</i>     | [91]      | 100    | 0      | 0      |
| <i>Trichomanes crinitum</i>     | <i>Trichomanes crinitum</i>     | [36]      | 0      | 100    | 0      |
| <i>Trichomanes crinitum</i>     | <i>Trichomanes crinitum</i>     | [94]      | 85     | 0      | 15     |
| <i>Trichomanes crinitum</i>     | <i>Trichomanes crinitum</i>     | [29]      | 0      | 0      | 100    |
| <i>Trichomanes crinitum</i>     | <i>Trichomanes crinitum</i>     | [213]     | 50     | 50     | 0      |
| <i>Trichomanes crispiforme</i>  | <i>Trichomanes crispiforme</i>  | [20]      | 0      | 0      | 100    |
| <i>Trichomanes crispiforme</i>  | <i>Trichomanes crispiforme</i>  | [72]      | 100    | 0      | 0      |
| <i>Trichomanes crispiforme</i>  | <i>Trichomanes crispiforme</i>  | [73]      | 100    | 0      | 0      |
| <i>Trichomanes crispum</i>      | <i>Trichomanes crispum</i>      | [22]      | 0      | 0      | 100    |
| <i>Trichomanes crispum</i>      | <i>Trichomanes crispum</i>      | [86]      | 0      | 50     | 50     |
| <i>Trichomanes crispum</i>      | <i>Trichomanes crispum</i>      | [18]      | 50     | 0      | 50     |
| <i>Trichomanes crispum</i>      | <i>Trichomanes crispum</i>      | [20]      | 0      | 0      | 100    |
| <i>Trichomanes crispum</i>      | <i>Trichomanes crispum</i>      | [44]      | 50     | 50     | 0      |
| <i>Trichomanes crispum</i>      | <i>Trichomanes crispum</i>      | [90]      | 100    | 0      | 0      |
| <i>Trichomanes crispum</i>      | <i>Trichomanes crispum</i>      | [91]      | 100    | 0      | 0      |
| <i>Trichomanes crispum</i>      | <i>Trichomanes crispum</i>      | [36]      | 33.3   | 33.3   | 33.4   |
| <i>Trichomanes crispum</i>      | <i>Trichomanes crispum</i>      | [196]     | 100    | 0      | 0      |
| <i>Trichomanes crispum</i>      | <i>Trichomanes crispum</i>      | [94]      | 95     | 0      | 5      |
| <i>Trichomanes crispum</i>      | <i>Trichomanes crispum</i>      | [29]      | 33     | 34     | 33     |
| <i>Trichomanes crispum</i>      | <i>Trichomanes crispum</i>      | [95]      | 50     | 0      | 50     |
| <i>Trichomanes crispum</i>      | <i>Trichomanes crispum</i>      | [96]      | 100    | 0      | 0      |
| <i>Trichomanes crispum</i>      | <i>Trichomanes crispum</i>      | [213]     | 50     | 50     | 0      |
| <i>Trichomanes crispum</i>      | <i>Trichomanes crispum</i>      | [102]     | 0      | 100    | 0      |
| <i>Trichomanes crispum</i>      | <i>Trichomanes crispum</i>      | [105]     | 100    | 0      | 0      |
| <i>Trichomanes crispum</i>      | <i>Trichomanes crispum</i>      | [151]     | 0      | 0      | 100    |
| <i>Trichomanes cristatum</i>    | <i>Trichomanes cristatum</i>    | [20]      | 0      | 0      | 100    |
| <i>Trichomanes cristatum</i>    | <i>Trichomanes cristatum</i>    | [88]      | 100    | 0      | 0      |
| <i>Trichomanes cristatum</i>    | <i>Trichomanes cristatum</i>    | [36]      | 33.3   | 33.3   | 33.4   |
| <i>Trichomanes cristatum</i>    | <i>Trichomanes cristatum</i>    | [43]      | 5      | 0      | 95     |
| <i>Trichomanes cristatum</i>    | <i>Trichomanes cristatum</i>    | [29]      | 0      | 50     | 50     |
| <i>Trichomanes cristatum</i>    | <i>Trichomanes cristatum</i>    | [95]      | 50     | 0      | 50     |
| <i>Trichomanes cristatum</i>    | <i>Trichomanes cristatum</i>    | [97]      | 100    | 0      | 0      |
| <i>Trichomanes cristatum</i>    | <i>Trichomanes cristatum</i>    | [213]     | 15     | 0      | 85     |
| <i>Trichomanes cristatum</i>    | <i>Trichomanes cristatum</i>    | [99]      | 0      | 0      | 100    |
| <i>Trichomanes cristatum</i>    | <i>Trichomanes cristatum</i>    | [101]     | 0      | 0      | 100    |
| <i>Trichomanes cristatum</i>    | <i>Trichomanes cristatum</i>    | [103]     | 0      | 0      | 100    |
| <i>Trichomanes cristatum</i>    | <i>Trichomanes cristatum</i>    | [104]     | 0      | 0      | 100    |
| <i>Trichomanes cupressoides</i> | <i>Trichomanes cupressoides</i> | [214]     | 0      | 0      | 100    |
| <i>Trichomanes cupressoides</i> | <i>Trichomanes cupressoides</i> | [141]     | 0      | 100    | 0      |
| <i>Trichomanes cupressoides</i> | <i>Trichomanes cupressoides</i> | [20]      | 0      | 0      | 100    |

| Valid species name              | Species name in source          | Reference | EV (%) | LV (%) | TV (%) |
|---------------------------------|---------------------------------|-----------|--------|--------|--------|
| <i>Trichomanes cupressoides</i> | <i>Trichomanes cupressoides</i> | [72]      | 0      | 100    | 0      |
| <i>Trichomanes cupressoides</i> | <i>Trichomanes cupressoides</i> | [108]     | 50     | 50     | 0      |
| <i>Trichomanes dactylites</i>   | <i>Trichomanes dactylites</i>   | [18]      | 100    | 0      | 0      |
| <i>Trichomanes dactylites</i>   | <i>Trichomanes dactylites</i>   | [20]      | 50     | 0      | 50     |
| <i>Trichomanes dactylites</i>   | <i>Trichomanes dactylites</i>   | [36]      | 33.3   | 33.3   | 33.4   |
| <i>Trichomanes dactylites</i>   | <i>Trichomanes dactylites</i>   | [94]      | 100    | 0      | 0      |
| <i>Trichomanes dactylites</i>   | <i>Trichomanes dactylites</i>   | [213]     | 15     | 0      | 85     |
| <i>Trichomanes dactylites</i>   | <i>Trichomanes dactylis</i>     | [168]     | 0      | 0      | 100    |
| <i>Trichomanes delicatum</i>    | <i>Trichomanes delicatum</i>    | [36]      | 100    | 0      | 0      |
| <i>Trichomanes delicatum</i>    | <i>Trichomanes delicatum</i>    | [43]      | 100    | 0      | 0      |
| <i>Trichomanes delicatum</i>    | <i>Trichomanes delicatum</i>    | [94]      | 100    | 0      | 0      |
| <i>Trichomanes delicatum</i>    | <i>Trichomanes delicatum</i>    | [213]     | 100    | 0      | 0      |
| <i>Trichomanes delicatum</i>    | <i>Trichomanes delicatum</i>    | [105]     | 100    | 0      | 0      |
| <i>Trichomanes diversifrons</i> | <i>Trichomanes diversifrons</i> | [22]      | 0      | 0      | 100    |
| <i>Trichomanes diversifrons</i> | <i>Trichomanes diversifrons</i> | [18]      | 0      | 0      | 100    |
| <i>Trichomanes diversifrons</i> | <i>Trichomanes diversifrons</i> | [140]     | 0      | 0      | 100    |
| <i>Trichomanes diversifrons</i> | <i>Trichomanes diversifrons</i> | [20]      | 0      | 0      | 100    |
| <i>Trichomanes diversifrons</i> | <i>Trichomanes diversifrons</i> | [90]      | 0      | 0      | 100    |
| <i>Trichomanes diversifrons</i> | <i>Trichomanes diversifrons</i> | [91]      | 100    | 0      | 0      |
| <i>Trichomanes diversifrons</i> | <i>Trichomanes diversifrons</i> | [36]      | 0      | 0      | 100    |
| <i>Trichomanes diversifrons</i> | <i>Trichomanes diversifrons</i> | [43]      | 0      | 0      | 100    |
| <i>Trichomanes diversifrons</i> | <i>Trichomanes diversifrons</i> | [94]      | 0      | 0      | 100    |
| <i>Trichomanes diversifrons</i> | <i>Trichomanes diversifrons</i> | [29]      | 0      | 0      | 100    |
| <i>Trichomanes diversifrons</i> | <i>Trichomanes diversifrons</i> | [95]      | 0      | 0      | 100    |
| <i>Trichomanes egleri</i>       | <i>Trichomanes egleri</i>       | [22]      | 0      | 50     | 50     |
| <i>Trichomanes egleri</i>       | <i>Trichomanes egleri</i>       | [20]      | 0      | 0      | 100    |
| <i>Trichomanes egleri</i>       | <i>Trichomanes egleri</i>       | [36]      | 33.3   | 33.3   | 33.4   |
| <i>Trichomanes egleri</i>       | <i>Trichomanes egleri</i>       | [29]      | 0      | 100    | 0      |
| <i>Trichomanes egleri</i>       | <i>Trichomanes egleri</i>       | [213]     | 50     | 50     | 0      |
| <i>Trichomanes elegans</i>      | <i>Trichomanes elegans</i>      | [22]      | 0      | 0      | 100    |
| <i>Trichomanes elegans</i>      | <i>Trichomanes elegans</i>      | [86]      | 0      | 0      | 100    |
| <i>Trichomanes elegans</i>      | <i>Trichomanes elegans</i>      | [18]      | 0      | 0      | 100    |
| <i>Trichomanes elegans</i>      | <i>Trichomanes elegans</i>      | [140]     | 0      | 0      | 100    |
| <i>Trichomanes elegans</i>      | <i>Trichomanes elegans</i>      | [20]      | 0      | 0      | 100    |
| <i>Trichomanes elegans</i>      | <i>Trichomanes elegans</i>      | [89]      | 0      | 50     | 50     |
| <i>Trichomanes elegans</i>      | <i>Trichomanes elegans</i>      | [90]      | 0      | 15     | 85     |
| <i>Trichomanes elegans</i>      | <i>Trichomanes elegans</i>      | [36]      | 33.3   | 33.3   | 33.4   |
| <i>Trichomanes elegans</i>      | <i>Trichomanes elegans</i>      | [43]      | 5      | 47.5   | 47.5   |
| <i>Trichomanes elegans</i>      | <i>Trichomanes elegans</i>      | [94]      | 0      | 0      | 100    |
| <i>Trichomanes elegans</i>      | <i>Trichomanes elegans</i>      | [29]      | 0      | 0      | 100    |
| <i>Trichomanes elegans</i>      | <i>Trichomanes elegans</i>      | [133]     | 0      | 0      | 100    |
| <i>Trichomanes elegans</i>      | <i>Trichomanes elegans</i>      | [95]      | 0      | 0      | 100    |
| <i>Trichomanes elegans</i>      | <i>Trichomanes elegans</i>      | [99]      | 0      | 50     | 50     |
| <i>Trichomanes elegans</i>      | <i>Trichomanes elegans</i>      | [151]     | 0      | 0      | 100    |
| <i>Trichomanes galeottii</i>    | <i>Trichomanes galeottii</i>    | [18]      | 100    | 0      | 0      |
| <i>Trichomanes galeottii</i>    | <i>Trichomanes galeottii</i>    | [20]      | 0      | 0      | 100    |
| <i>Trichomanes galeottii</i>    | <i>Trichomanes galeottii</i>    | [94]      | 100    | 0      | 0      |
| <i>Trichomanes galeottii</i>    | <i>Trichomanes galeottii</i>    | [96]      | 100    | 0      | 0      |
| <i>Trichomanes galeottii</i>    | <i>Trichomanes galeottii</i>    | [213]     | 50     | 0      | 50     |
| <i>Trichomanes guidoi</i>       | <i>Trichomanes guidoi</i>       | [22]      | 50     | 50     | 0      |
| <i>Trichomanes guidoi</i>       | <i>Trichomanes guidoi</i>       | [20]      | 0      | 0      | 100    |

| Valid species name                 | Species name in source             | Reference | EV (%) | LV (%) | TV (%) |
|------------------------------------|------------------------------------|-----------|--------|--------|--------|
| <i>Trichomanes guidoi</i>          | <i>Trichomanes guidoi</i>          | [36]      | 0      | 0      | 100    |
| <i>Trichomanes holopterum</i>      | <i>Trichomanes holopterum</i>      | [86]      | 100    | 0      | 0      |
| <i>Trichomanes holopterum</i>      | <i>Trichomanes holopterum</i>      | [20]      | 0      | 0      | 100    |
| <i>Trichomanes holopterum</i>      | <i>Trichomanes holopterum</i>      | [150]     | 100    | 0      | 0      |
| <i>Trichomanes hostmannianum</i>   | <i>Trichomanes hostmannianum</i>   | [22]      | 0      | 0      | 100    |
| <i>Trichomanes hostmannianum</i>   | <i>Trichomanes hostmannianum</i>   | [20]      | 0      | 0      | 100    |
| <i>Trichomanes hostmannianum</i>   | <i>Trichomanes hostmannianum</i>   | [36]      | 0      | 50     | 50     |
| <i>Trichomanes hostmannianum</i>   | <i>Trichomanes hostmannianum</i>   | [43]      | 100    | 0      | 0      |
| <i>Trichomanes hostmannianum</i>   | <i>Trichomanes hostmannianum</i>   | [94]      | 0      | 0      | 100    |
| <i>Trichomanes hostmannianum</i>   | <i>Trichomanes hostmannianum</i>   | [29]      | 0      | 0      | 100    |
| <i>Trichomanes hostmannianum</i>   | <i>Trichomanes hostmannianum</i>   | [99]      | 0      | 0      | 100    |
| <i>Trichomanes hostmannianum</i>   | <i>Trichomanes hostmannianum</i>   | [151]     | 0      | 0      | 100    |
| <i>Trichomanes humboldtii</i>      | <i>Trichomanes humboldtii</i>      | [22]      | 0      | 0      | 100    |
| <i>Trichomanes humboldtii</i>      | <i>Trichomanes humboldtii</i>      | [20]      | 0      | 0      | 100    |
| <i>Trichomanes humboldtii</i>      | <i>Trichomanes humboldtii</i>      | [36]      | 0      | 0      | 100    |
| <i>Trichomanes humboldtii</i>      | <i>Trichomanes humboldtii</i>      | [196]     | 50     | 50     | 0      |
| <i>Trichomanes humboldtii</i>      | <i>Trichomanes humboldtii</i>      | [29]      | 0      | 0      | 100    |
| <i>Trichomanes humboldtii</i>      | <i>Trichomanes humboldtii</i>      | [213]     | 0      | 0      | 100    |
| <i>Trichomanes humboldtii</i>      | <i>Trichomanes humboldtii</i>      | [99]      | 0      | 0      | 100    |
| <i>Trichomanes jenmanii</i>        | <i>Trichomanes jenmanii</i>        | [20]      | 0      | 0      | 100    |
| <i>Trichomanes jenmanii</i>        | <i>Trichomanes jenmanii</i>        | [29]      | 0      | 0      | 100    |
| <i>Trichomanes kalbreyeri</i>      | <i>Trichomanes kalbreyeri</i>      | [18]      | 100    | 0      | 0      |
| <i>Trichomanes kalbreyeri</i>      | <i>Trichomanes kalbreyeri</i>      | [94]      | 100    | 0      | 0      |
| <i>Trichomanes lucens</i>          | <i>Trichomanes lucens</i>          | [22]      | 50     | 0      | 50     |
| <i>Trichomanes lucens</i>          | <i>Trichomanes lucens</i>          | [18]      | 100    | 0      | 0      |
| <i>Trichomanes lucens</i>          | <i>Trichomanes lambertianum</i>    | [20]      | 0      | 0      | 100    |
| <i>Trichomanes lucens</i>          | <i>Trichomanes lucens</i>          | [20]      | 50     | 0      | 50     |
| <i>Trichomanes lucens</i>          | <i>Trichomanes lucens</i>          | [44]      | 50     | 0      | 50     |
| <i>Trichomanes lucens</i>          | <i>Trichomanes lucens</i>          | [91]      | 100    | 0      | 0      |
| <i>Trichomanes lucens</i>          | <i>Trichomanes lucens</i>          | [36]      | 0      | 50     | 50     |
| <i>Trichomanes lucens</i>          | <i>Trichomanes lucens</i>          | [43]      | 0      | 50     | 50     |
| <i>Trichomanes lucens</i>          | <i>Trichomanes lucens</i>          | [94]      | 100    | 0      | 0      |
| <i>Trichomanes lucens</i>          | <i>Trichomanes lucens</i>          | [26]      | 100    | 0      | 0      |
| <i>Trichomanes lucens</i>          | <i>Trichomanes lucens</i>          | [213]     | 50     | 0      | 50     |
| <i>Trichomanes lucens</i>          | <i>Trichomanes lucens</i>          | [105]     | 100    | 0      | 0      |
| <i>Trichomanes ludovicianum</i>    | <i>Trichomanes ludovicinum</i>     | [18]      | 50     | 0      | 50     |
| <i>Trichomanes ludovicianum</i>    | <i>Trichomanes ludovicinum</i>     | [91]      | 100    | 0      | 0      |
| <i>Trichomanes ludovicianum</i>    | <i>Trichomanes ludovicinum</i>     | [94]      | 50     | 0      | 50     |
| <i>Trichomanes ludovicianum</i>    | <i>Trichomanes ludovicinum</i>     | [213]     | 50     | 50     | 0      |
| <i>Trichomanes ludovicianum</i>    | <i>Trichomanes ludovicinum</i>     | [105]     | 100    | 0      | 0      |
| <i>Trichomanes macilentum</i>      | <i>Trichomanes macilentum</i>      | [22]      | 50     | 50     | 0      |
| <i>Trichomanes macilentum</i>      | <i>Trichomanes macilentum</i>      | [20]      | 0      | 0      | 100    |
| <i>Trichomanes macilentum</i>      | <i>Trichomanes macilentum</i>      | [36]      | 0      | 33     | 67     |
| <i>Trichomanes macilentum</i>      | <i>Trichomanes macilentum</i>      | [151]     | 0      | 0      | 100    |
| <i>Trichomanes madagascariense</i> | <i>Trichomanes madagascariense</i> | [20]      | 0      | 0      | 100    |
| <i>Trichomanes martiusii</i>       | <i>Trichomanes martiusii</i>       | [22]      | 50     | 0      | 50     |
| <i>Trichomanes martiusii</i>       | <i>Trichomanes martiusii</i>       | [20]      | 0      | 0      | 100    |
| <i>Trichomanes martiusii</i>       | <i>Trichomanes martiusii</i>       | [36]      | 50     | 0      | 50     |
| <i>Trichomanes martiusii</i>       | <i>Trichomanes martiusii</i>       | [29]      | 15     | 0      | 85     |
| <i>Trichomanes martiusii</i>       | <i>Trichomanes martiusii</i>       | [213]     | 50     | 0      | 50     |
| <i>Trichomanes martiusii</i>       | <i>Trichomanes martiusii</i>       | [151]     | 0      | 0      | 100    |

| Valid species name              | Species name in source          | Reference | EV (%) | LV (%) | TV (%) |
|---------------------------------|---------------------------------|-----------|--------|--------|--------|
| <i>Trichomanes micayense</i>    | <i>Trichomanes micayense</i>    | [213]     | 100    | 0      | 0      |
| <i>Trichomanes mougeotii</i>    | <i>Trichomanes mougeotii</i>    | [20]      | 0      | 0      | 100    |
| <i>Trichomanes mougeotii</i>    | <i>Trichomanes mougeotii</i>    | [29]      | 0      | 50     | 50     |
| <i>Trichomanes mougeotii</i>    | <i>Trichomanes mougeotii</i>    | [95]      | 0      | 0      | 100    |
| <i>Trichomanes murilloanum</i>  | <i>Trichomanes murilloanum</i>  | [215]     | 0      | 100    | 0      |
| <i>Trichomanes osmundoides</i>  | <i>Trichomanes osmundoides</i>  | [86]      | 0      | 0      | 100    |
| <i>Trichomanes osmundoides</i>  | <i>Trichomanes osmundoides</i>  | [18]      | 0      | 0      | 100    |
| <i>Trichomanes osmundoides</i>  | <i>Trichomanes osmundoides</i>  | [20]      | 0      | 0      | 100    |
| <i>Trichomanes osmundoides</i>  | <i>Trichomanes osmundoides</i>  | [90]      | 0      | 0      | 100    |
| <i>Trichomanes osmundoides</i>  | <i>Trichomanes osmundoides</i>  | [36]      | 0      | 50     | 50     |
| <i>Trichomanes osmundoides</i>  | <i>Trichomanes osmundoides</i>  | [94]      | 0      | 0      | 100    |
| <i>Trichomanes osmundoides</i>  | <i>Trichomanes osmundoides</i>  | [29]      | 0      | 0      | 100    |
| <i>Trichomanes osmundoides</i>  | <i>Trichomanes osmundoides</i>  | [95]      | 0      | 0      | 100    |
| <i>Trichomanes pedicellatum</i> | <i>Trichomanes pedicellatum</i> | [22]      | 100    | 0      | 0      |
| <i>Trichomanes pedicellatum</i> | <i>Trichomanes pedicellatum</i> | [86]      | 100    | 0      | 0      |
| <i>Trichomanes pedicellatum</i> | <i>Trichomanes pedicellatum</i> | [132]     | 100    | 0      | 0      |
| <i>Trichomanes pedicellatum</i> | <i>Trichomanes pedicellatum</i> | [20]      | 0      | 100    | 0      |
| <i>Trichomanes pedicellatum</i> | <i>Trichomanes pedicellatum</i> | [91]      | 100    | 0      | 0      |
| <i>Trichomanes pedicellatum</i> | <i>Trichomanes pedicellatum</i> | [36]      | 100    | 0      | 0      |
| <i>Trichomanes pedicellatum</i> | <i>Trichomanes pedicellatum</i> | [29]      | 100    | 0      | 0      |
| <i>Trichomanes pedicellatum</i> | <i>Trichomanes pedicellatum</i> | [99]      | 100    | 0      | 0      |
| <i>Trichomanes pellucens</i>    | <i>Trichomanes pellucens</i>    | [22]      | 0      | 0      | 100    |
| <i>Trichomanes pellucens</i>    | <i>Trichomanes pellucens</i>    | [20]      | 0      | 0      | 100    |
| <i>Trichomanes pellucens</i>    | <i>Trichomanes pellucens</i>    | [36]      | 33.3   | 33.3   | 33.4   |
| <i>Trichomanes pellucens</i>    | <i>Trichomanes pellucens</i>    | [94]      | 5      | 47.5   | 47.5   |
| <i>Trichomanes pellucens</i>    | <i>Trichomanes pellucens</i>    | [29]      | 50     | 0      | 50     |
| <i>Trichomanes pellucens</i>    | <i>Trichomanes pellucens</i>    | [213]     | 15     | 0      | 85     |
| <i>Trichomanes pellucens</i>    | <i>Trichomanes pellucens</i>    | [99]      | 15     | 0      | 85     |
| <i>Trichomanes pilosum</i>      | <i>Trichomanes pilosum</i>      | [22]      | 33.3   | 33.3   | 33.4   |
| <i>Trichomanes pilosum</i>      | <i>Trichomanes pilosum</i>      | [89]      | 0      | 0      | 100    |
| <i>Trichomanes pilosum</i>      | <i>Trichomanes pilosum</i>      | [43]      | 5      | 47.5   | 47.5   |
| <i>Trichomanes pilosum</i>      | <i>Trichomanes pilosum</i>      | [133]     | 100    | 0      | 0      |
| <i>Trichomanes pilosum</i>      | <i>Trichomanes pilosum</i>      | [213]     | 5      | 47.5   | 47.5   |
| <i>Trichomanes pilosum</i>      | <i>Trichomanes pilosum</i>      | [99]      | 0      | 15     | 85     |
| <i>Trichomanes pilosum</i>      | <i>Trichomanes pilosum</i>      | [101]     | 0      | 85     | 15     |
| <i>Trichomanes pilosum</i>      | <i>Trichomanes pilosum</i>      | [151]     | 0      | 0      | 100    |
| <i>Trichomanes pinnatum</i>     | <i>Trichomanes pinnatum</i>     | [22]      | 0      | 0      | 100    |
| <i>Trichomanes pinnatum</i>     | <i>Trichomanes pinnatum</i>     | [86]      | 0      | 0      | 100    |
| <i>Trichomanes pinnatum</i>     | <i>Trichomanes pinnatum</i>     | [18]      | 0      | 0      | 100    |
| <i>Trichomanes pinnatum</i>     | <i>Trichomanes pinnatum</i>     | [140]     | 0      | 0      | 100    |
| <i>Trichomanes pinnatum</i>     | <i>Trichomanes pinnatum</i>     | [132]     | 0      | 0      | 100    |
| <i>Trichomanes pinnatum</i>     | <i>Trichomanes pinnatum</i>     | [20]      | 0      | 0      | 100    |
| <i>Trichomanes pinnatum</i>     | <i>Trichomanes pinnatum</i>     | [90]      | 0      | 0      | 100    |
| <i>Trichomanes pinnatum</i>     | <i>Trichomanes pinnatum</i>     | [36]      | 0      | 50     | 50     |
| <i>Trichomanes pinnatum</i>     | <i>Trichomanes pinnatum</i>     | [43]      | 2.5    | 2.5    | 95     |
| <i>Trichomanes pinnatum</i>     | <i>Trichomanes pinnatum</i>     | [94]      | 0      | 0      | 100    |
| <i>Trichomanes pinnatum</i>     | <i>Trichomanes pinnatum</i>     | [29]      | 0      | 0      | 100    |
| <i>Trichomanes pinnatum</i>     | <i>Trichomanes pinnatum</i>     | [95]      | 0      | 0      | 100    |
| <i>Trichomanes pinnatum</i>     | <i>Trichomanes pinnatum</i>     | [99]      | 0      | 0      | 100    |
| <i>Trichomanes pinnatum</i>     | <i>Trichomanes pinnatum</i>     | [151]     | 0      | 0      | 100    |
| <i>Trichomanes plumosum</i>     | <i>Trichomanes plumosum</i>     | [22]      | 0      | 0      | 100    |

| Valid species name               | Species name in source           | Reference | EV (%) | LV (%) | TV (%) |
|----------------------------------|----------------------------------|-----------|--------|--------|--------|
| <i>Trichomanes plumosum</i>      | <i>Trichomanes plumosum</i>      | [18]      | 100    | 0      | 0      |
| <i>Trichomanes plumosum</i>      | <i>Trichomanes plumosum</i>      | [20]      | 0      | 0      | 100    |
| <i>Trichomanes plumosum</i>      | <i>Trichomanes plumosum</i>      | [36]      | 33.3   | 33.3   | 33.4   |
| <i>Trichomanes plumosum</i>      | <i>Trichomanes plumosum</i>      | [94]      | 100    | 0      | 0      |
| <i>Trichomanes plumosum</i>      | <i>Trichomanes plumosum</i>      | [29]      | 0      | 0      | 100    |
| <i>Trichomanes plumosum</i>      | <i>Trichomanes plumosum</i>      | [213]     | 50     | 0      | 50     |
| <i>Trichomanes polypodioides</i> | <i>Trichomanes polypodioides</i> | [22]      | 100    | 0      | 0      |
| <i>Trichomanes polypodioides</i> | <i>Trichomanes polypodioides</i> | [86]      | 100    | 0      | 0      |
| <i>Trichomanes polypodioides</i> | <i>Trichomanes polypodioides</i> | [18]      | 100    | 0      | 0      |
| <i>Trichomanes polypodioides</i> | <i>Trichomanes polypodioides</i> | [140]     | 100    | 0      | 0      |
| <i>Trichomanes polypodioides</i> | <i>Trichomanes polypodioides</i> | [20]      | 100    | 0      | 0      |
| <i>Trichomanes polypodioides</i> | <i>Trichomanes polypodioides</i> | [44]      | 100    | 0      | 0      |
| <i>Trichomanes polypodioides</i> | <i>Trichomanes polypodioides</i> | [88]      | 100    | 0      | 0      |
| <i>Trichomanes polypodioides</i> | <i>Trichomanes polypodioides</i> | [89]      | 100    | 0      | 0      |
| <i>Trichomanes polypodioides</i> | <i>Trichomanes polypodioides</i> | [91]      | 0      | 0      | 100    |
| <i>Trichomanes polypodioides</i> | <i>Trichomanes polypodioides</i> | [36]      | 100    | 0      | 0      |
| <i>Trichomanes polypodioides</i> | <i>Trichomanes polypodioides</i> | [43]      | 95     | 0      | 5      |
| <i>Trichomanes polypodioides</i> | <i>Trichomanes polypodioides</i> | [94]      | 100    | 0      | 0      |
| <i>Trichomanes polypodioides</i> | <i>Trichomanes polypodioides</i> | [29]      | 0      | 100    | 0      |
| <i>Trichomanes polypodioides</i> | <i>Trichomanes polypodioides</i> | [133]     | 100    | 0      | 0      |
| <i>Trichomanes polypodioides</i> | <i>Trichomanes polypodioides</i> | [95]      | 100    | 0      | 0      |
| <i>Trichomanes polypodioides</i> | <i>Trichomanes polypodioides</i> | [96]      | 100    | 0      | 0      |
| <i>Trichomanes polypodioides</i> | <i>Trichomanes polypodioides</i> | [97]      | 100    | 0      | 0      |
| <i>Trichomanes polypodioides</i> | <i>Trichomanes polypodioides</i> | [99]      | 100    | 0      | 0      |
| <i>Trichomanes polypodioides</i> | <i>Trichomanes polypodioides</i> | [101]     | 100    | 0      | 0      |
| <i>Trichomanes resinosum</i>     | <i>Trichomanes resinosum</i>     | [36]      | 0      | 50     | 50     |
| <i>Trichomanes resinosum</i>     | <i>Trichomanes resinosum</i>     | [216]     | 0      | 50     | 50     |
| <i>Trichomanes ribae</i>         | <i>Trichomanes ribae</i>         | [217]     | 100    | 0      | 0      |
| <i>Trichomanes robustum</i>      | <i>Trichomanes robustum</i>      | [86]      | 50     | 0      | 50     |
| <i>Trichomanes robustum</i>      | <i>Trichomanes robustum</i>      | [20]      | 0      | 0      | 100    |
| <i>Trichomanes robustum</i>      | <i>Trichomanes robustum</i>      | [36]      | 50     | 0      | 50     |
| <i>Trichomanes robustum</i>      | <i>Trichomanes robustum</i>      | [213]     | 50     | 0      | 50     |
| <i>Trichomanes robustum</i>      | <i>Trichomanes robustum</i>      | [168]     | 100    | 0      | 0      |
| <i>Trichomanes roraimense</i>    | <i>Trichomanes roraimense</i>    | [22]      | 33.3   | 33.3   | 33.4   |
| <i>Trichomanes roraimense</i>    | <i>Trichomanes roraimense</i>    | [20]      | 0      | 0      | 100    |
| <i>Trichomanes roraimense</i>    | <i>Trichomanes roraimense</i>    | [36]      | 33.3   | 33.3   | 33.4   |
| <i>Trichomanes roraimense</i>    | <i>Trichomanes roraimense</i>    | [29]      | 50     | 50     | 0      |
| <i>Trichomanes roraimense</i>    | <i>Trichomanes roraimense</i>    | [213]     | 50     | 50     | 0      |
| <i>Trichomanes scandens</i>      | <i>Trichomanes scandens</i>      | [20]      | 100    | 0      | 0      |
| <i>Trichomanes scandens</i>      | <i>Trichomanes scandens</i>      | [98]      | 0      | 0      | 100    |
| <i>Trichomanes sellowianum</i>   | <i>Trichomanes sellowianum</i>   | [18]      | 100    | 0      | 0      |
| <i>Trichomanes spruceanum</i>    | <i>Trichomanes spruceanum</i>    | [36]      | 0      | 0      | 100    |
| <i>Trichomanes spruceanum</i>    | <i>Trichomanes spruceanum</i>    | [99]      | 0      | 0      | 100    |
| <i>Trichomanes steyermarkii</i>  | <i>Trichomanes steyermarkii</i>  | [20]      | 50     | 0      | 50     |
| <i>Trichomanes steyermarkii</i>  | <i>Trichomanes steyermarkii</i>  | [36]      | 50     | 50     | 0      |
| <i>Trichomanes steyermarkii</i>  | <i>Trichomanes steyermarkii</i>  | [29]      | 50     | 50     | 0      |
| <i>Trichomanes steyermarkii</i>  | <i>Trichomanes steyermarkii</i>  | [213]     | 50     | 50     | 0      |
| <i>Trichomanes sublabiatum</i>   | <i>Trichomanes sublabiatum</i>   | [36]      | 0      | 100    | 0      |
| <i>Trichomanes sublabiatum</i>   | <i>Trichomanes sublabiatum</i>   | [213]     | 100    | 0      | 0      |
| <i>Trichomanes superbum</i>      | <i>Trichomanes superbum</i>      | [20]      | 100    | 0      | 0      |
| <i>Trichomanes superbum</i>      | <i>Trichomanes currani</i>       | [20]      | 0      | 0      | 100    |

| Valid species name               | Species name in source           | Reference | EV (%) | LV (%) | TV (%) |
|----------------------------------|----------------------------------|-----------|--------|--------|--------|
| <i>Trichomanes superbum</i>      | <i>Trichomanes superbum</i>      | [36]      | 0      | 0      | 100    |
| <i>Trichomanes tanaicum</i>      | <i>Trichomanes tanaicum</i>      | [20]      | 0      | 100    | 0      |
| <i>Trichomanes tanaicum</i>      | <i>Trichomanes tanaicum</i>      | [36]      | 100    | 0      | 0      |
| <i>Trichomanes tanaicum</i>      | <i>Trichomanes tanaicum</i>      | [43]      | 100    | 0      | 0      |
| <i>Trichomanes tanaicum</i>      | <i>Trichomanes tanaicum</i>      | [29]      | 100    | 0      | 0      |
| <i>Trichomanes trigonum</i>      | <i>Trichomanes trigonum</i>      | [86]      | 0      | 0      | 100    |
| <i>Trichomanes trigonum</i>      | <i>Trichomanes trigonum</i>      | [20]      | 0      | 0      | 100    |
| <i>Trichomanes trigonum</i>      | <i>Trichomanes fimbriatum</i>    | [20]      | 0      | 0      | 100    |
| <i>Trichomanes trigonum</i>      | <i>Trichomanes trigonum</i>      | [36]      | 0      | 50     | 50     |
| <i>Trichomanes trigonum</i>      | <i>Trichomanes trigonum</i>      | [102]     | 0      | 0      | 100    |
| <i>Trichomanes trollii</i>       | <i>Trichomanes trollii</i>       | [20]      | 0      | 0      | 100    |
| <i>Trichomanes trollii</i>       | <i>Trichomanes trollii</i>       | [36]      | 0      | 50     | 50     |
| <i>Trichomanes trollii</i>       | <i>Trichomanes trollii</i>       | [43]      | 0      | 5      | 95     |
| <i>Trichomanes trollii</i>       | <i>Trichomanes trollii</i>       | [29]      | 5      | 47.5   | 47.5   |
| <i>Trichomanes trollii</i>       | <i>Trichomanes trollii</i>       | [99]      | 0      | 0      | 100    |
| <i>Trichomanes trollii</i>       | <i>Trichomanes trollii</i>       | [151]     | 0      | 0      | 100    |
| <i>Trichomanes tuerckheimii</i>  | <i>Trichomanes tuerckheimii</i>  | [18]      | 100    | 0      | 0      |
| <i>Trichomanes tuerckheimii</i>  | <i>Trichomanes tuerckheimii</i>  | [20]      | 0      | 100    | 0      |
| <i>Trichomanes tuerckheimii</i>  | <i>Trichomanes tuerckheimii</i>  | [44]      | 100    | 0      | 0      |
| <i>Trichomanes tuerckheimii</i>  | <i>Trichomanes tuerckheimii</i>  | [90]      | 100    | 0      | 0      |
| <i>Trichomanes tuerckheimii</i>  | <i>Trichomanes tuerckheimii</i>  | [36]      | 100    | 0      | 0      |
| <i>Trichomanes tuerckheimii</i>  | <i>Trichomanes tuerckheimii</i>  | [94]      | 100    | 0      | 0      |
| <i>Trichomanes tuerckheimii</i>  | <i>Trichomanes tuerckheimii</i>  | [29]      | 100    | 0      | 0      |
| <i>Trichomanes tuerckheimii</i>  | <i>Trichomanes tuerckheimii</i>  | [95]      | 100    | 0      | 0      |
| <i>Trichomanes vandenboschii</i> | <i>Trichomanes vandenboschii</i> | [20]      | 0      | 0      | 100    |
| <i>Trichomanes vandenboschii</i> | <i>Trichomanes vandenboschii</i> | [36]      | 33.3   | 33.3   | 33.4   |
| <i>Trichomanes vandenboschii</i> | <i>Trichomanes vandenboschii</i> | [43]      | 10     | 80     | 10     |
| <i>Trichomanes vandenboschii</i> | <i>Trichomanes vandenboschii</i> | [29]      | 0      | 100    | 0      |
| <i>Trichomanes vandenboschii</i> | <i>Trichomanes vandenboschii</i> | [213]     | 0      | 100    | 0      |
| <i>Trichomanes vandenboschii</i> | <i>Trichomanes vandenboschii</i> | [99]      | 0      | 100    | 0      |
| <i>Trichomanes vaupesensis</i>   | <i>Trichomanes vaupesense</i>    | [213]     | 0      | 100    | 0      |
| <i>Trichomanes vittaria</i>      | <i>Trichomanes vittaria</i>      | [132]     | 0      | 0      | 100    |
| <i>Trichomanes vittaria</i>      | <i>Trichomanes vittaria</i>      | [20]      | 0      | 0      | 100    |
| <i>Trichomanes vittaria</i>      | <i>Trichomanes vittaria</i>      | [36]      | 0      | 0      | 100    |
| <i>Trichomanes vittaria</i>      | <i>Trichomanes vittaria</i>      | [43]      | 0      | 0      | 100    |
| <i>Trichomanes vittaria</i>      | <i>Trichomanes vittaria</i>      | [29]      | 0      | 5      | 95     |
| <i>Trichomanes vittaria</i>      | <i>Trichomanes vittaria</i>      | [95]      | 0      | 0      | 100    |
| <i>Trichomanes vittaria</i>      | <i>Trichomanes vittaria</i>      | [99]      | 0      | 0      | 100    |
| <i>Vandenboschia auriculata</i>  | <i>Vandenboschia auriculata</i>  | [20]      | 100    | 0      | 0      |
| <i>Vandenboschia auriculata</i>  | <i>Vandenboschia auriculata</i>  | [79]      | 50     | 50     | 0      |
| <i>Vandenboschia auriculata</i>  | <i>Vandenboschia auriculata</i>  | [61]      | 100    | 0      | 0      |
| <i>Vandenboschia auriculata</i>  | <i>Trichomanes auriculatum</i>   | [76]      | 0      | 0      | 100    |
| <i>Vandenboschia auriculata</i>  | <i>Vandenboschia auriculata</i>  | [53]      | 50     | 50     | 0      |
| <i>Vandenboschia birmanica</i>   | <i>Trichomanes stenosphon</i>    | [20]      | 100    | 0      | 0      |
| <i>Vandenboschia birmanica</i>   | <i>Vandenboschia birmanica</i>   | [20]      | 50     | 50     | 0      |
| <i>Vandenboschia birmanica</i>   | <i>Vandenboschia birmanica</i>   | [218]     | 0      | 100    | 0      |
| <i>Vandenboschia birmanica</i>   | <i>Vandenboschia birmanica</i>   | [79]      | 0      | 50     | 50     |
| <i>Vandenboschia boschiana</i>   | <i>Vandenboschia boschiana</i>   | [20]      | 100    | 0      | 0      |
| <i>Vandenboschia boschiana</i>   | <i>Vandenboschia boschiana</i>   | [153]     | 0      | 0      | 100    |
| <i>Vandenboschia collariata</i>  | <i>Vandenboschia collariata</i>  | [45]      | 100    | 0      | 0      |
| <i>Vandenboschia collariata</i>  | <i>Vandenboschia collariata</i>  | [22]      | 100    | 0      | 0      |



| Valid species name                  | Species name in source              | Reference | EV (%) | LV (%) | TV (%) |
|-------------------------------------|-------------------------------------|-----------|--------|--------|--------|
| <i>Vandenboschia collariata</i>     | <i>Trichomanes collariatum</i>      | [18]      | 100    | 0      | 0      |
| <i>Vandenboschia collariata</i>     | <i>Trichomanes collariatum</i>      | [20]      | 100    | 0      | 0      |
| <i>Vandenboschia collariata</i>     | <i>Vandenboschia collariata</i>     | [20]      | 100    | 0      | 0      |
| <i>Vandenboschia collariata</i>     | <i>Vandenboschia collariata</i>     | [44]      | 100    | 0      | 0      |
| <i>Vandenboschia collariata</i>     | <i>Trichomanes collariatum</i>      | [90]      | 100    | 0      | 0      |
| <i>Vandenboschia collariata</i>     | <i>Vandenboschia collariata</i>     | [90]      | 100    | 0      | 0      |
| <i>Vandenboschia collariata</i>     | <i>Vandenboschia collariata</i>     | [91]      | 50     | 0      | 50     |
| <i>Vandenboschia collariata</i>     | <i>Vandenboschia collariata</i>     | [36]      | 100    | 0      | 0      |
| <i>Vandenboschia collariata</i>     | <i>Trichomanes collariatum</i>      | [36]      | 100    | 0      | 0      |
| <i>Vandenboschia collariata</i>     | <i>Vandenboschia collariata</i>     | [43]      | 100    | 0      | 0      |
| <i>Vandenboschia collariata</i>     | <i>Trichomanes collariatum</i>      | [94]      | 100    | 0      | 0      |
| <i>Vandenboschia collariata</i>     | <i>Trichomanes collariatum</i>      | [155]     | 100    | 0      | 0      |
| <i>Vandenboschia collariata</i>     | <i>Vandenboschia collariata</i>     | [133]     | 0      | 100    | 0      |
| <i>Vandenboschia collariata</i>     | <i>Vandenboschia collariata</i>     | [96]      | 50     | 50     | 0      |
| <i>Vandenboschia collariata</i>     | <i>Trichomanes collariatum</i>      | [147]     | 0      | 50     | 50     |
| <i>Vandenboschia collariata</i>     | <i>Vandenboschia collariata</i>     | [105]     | 100    | 0      | 0      |
| <i>Vandenboschia collariata</i>     | <i>Vandenboschia collariata</i>     | [151]     | 100    | 0      | 0      |
| <i>Vandenboschia cyrtotheca</i>     | <i>Trichomanes cyrthoteca</i>       | [20]      | 100    | 0      | 0      |
| <i>Vandenboschia cyrtotheca</i>     | <i>Vandenboschia cyrtotheca</i>     | [20]      | 100    | 0      | 0      |
| <i>Vandenboschia cyrtotheca</i>     | <i>Vandenboschia cyrtotheca</i>     | [110]     | 0      | 0      | 100    |
| <i>Vandenboschia cystoseiroides</i> | <i>Vandenboschia cystoseiroides</i> | [61]      | 50     | 50     | 0      |
| <i>Vandenboschia davallioides</i>   | <i>Trichomanes davallioides</i>     | [20]      | 100    | 0      | 0      |
| <i>Vandenboschia davallioides</i>   | <i>Vandenboschia davallioides</i>   | [20]      | 100    | 0      | 0      |
| <i>Vandenboschia davallioides</i>   | <i>Vandenboschia davallioides</i>   | [182]     | 50     | 50     | 0      |
| <i>Vandenboschia fargesii</i>       | <i>Vandenboschia fargesii</i>       | [61]      | 50     | 50     | 0      |
| <i>Vandenboschia gigantea</i>       | <i>Trichomanes giganteum</i>        | [20]      | 100    | 0      | 0      |
| <i>Vandenboschia gigantea</i>       | <i>Vandenboschia gigantea</i>       | [20]      | 100    | 0      | 0      |
| <i>Vandenboschia gigantea</i>       | <i>Vandenboschia gigantea</i>       | [82]      | 0      | 0      | 100    |
| <i>Vandenboschia johnstonensis</i>  | <i>Trichomanes johnstonense</i>     | [20]      | 100    | 0      | 0      |
| <i>Vandenboschia johnstonensis</i>  | <i>Vandenboschia johnstonensis</i>  | [20]      | 100    | 0      | 0      |
| <i>Vandenboschia kalamocarpa</i>    | <i>Trichomanes parvum</i>           | [20]      | 100    | 0      | 0      |
| <i>Vandenboschia kalamocarpa</i>    | <i>Vandenboschia kalamocarpa</i>    | [20]      | 50     | 50     | 0      |
| <i>Vandenboschia kalamocarpa</i>    | <i>Vandenboschia kalamocarpa</i>    | [61]      | 0      | 100    | 0      |
| <i>Vandenboschia lofoushanensis</i> | <i>Vandenboschia lofoushanensis</i> | [61]      | 0      | 100    | 0      |
| <i>Vandenboschia maxima</i>         | <i>Trichomanes maximum</i>          | [28]      | 0      | 100    | 0      |
| <i>Vandenboschia maxima</i>         | <i>Vandenboschia maxima</i>         | [219]     | 100    | 0      | 0      |
| <i>Vandenboschia maxima</i>         | <i>Vandenboschia maxima</i>         | [164]     | 0      | 0      | 100    |
| <i>Vandenboschia maxima</i>         | <i>Trichomanes maximum</i>          | [57]      | 0      | 0      | 100    |
| <i>Vandenboschia maxima</i>         | <i>Trichomanes maximum</i>          | [20]      | 100    | 0      | 0      |
| <i>Vandenboschia maxima</i>         | <i>Vandenboschia maxima</i>         | [20]      | 100    | 0      | 0      |
| <i>Vandenboschia maxima</i>         | <i>Vandenboschia maxima</i>         | [74]      | 0      | 50     | 50     |
| <i>Vandenboschia maxima</i>         | <i>Vandenboschia maxima</i>         | [79]      | 0      | 50     | 50     |
| <i>Vandenboschia maxima</i>         | <i>Vandenboschia maxima</i>         | [61]      | 0      | 50     | 50     |
| <i>Vandenboschia maxima</i>         | <i>Vandenboschia maximum</i>        | [108]     | 50     | 50     | 0      |
| <i>Vandenboschia maxima</i>         | <i>Crepidomanes maximum</i>         | [75]      | 0      | 100    | 0      |
| <i>Vandenboschia maxima</i>         | <i>Trichomanes maximum</i>          | [76]      | 0      | 100    | 0      |
| <i>Vandenboschia maxima</i>         | <i>Vandenboschia maxima</i>         | [53]      | 100    | 0      | 0      |
| <i>Vandenboschia radicans</i>       | <i>Vandenboschia radicans</i>       | [145]     | 100    | 0      | 0      |
| <i>Vandenboschia radicans</i>       | <i>Vandenboschia radicans</i>       | [45]      | 100    | 0      | 0      |
| <i>Vandenboschia radicans</i>       | <i>Vandenboschia radicans</i>       | [83]      | 42.5   | 42.5   | 15     |
| <i>Vandenboschia radicans</i>       | <i>Vandenboschia radicans</i>       | [71]      | 50     | 50     | 0      |

| Valid species name                | Species name in source            | Reference | EV (%) | LV (%) | TV (%) |
|-----------------------------------|-----------------------------------|-----------|--------|--------|--------|
| <i>Vandenboschia radicans</i>     | <i>Vandenboschia radicans</i>     | [84]      | 85     | 0      | 15     |
| <i>Vandenboschia radicans</i>     | <i>Vandenboschia radicans</i>     | [22]      | 0      | 50     | 50     |
| <i>Vandenboschia radicans</i>     | <i>Vandenboschia radicans</i>     | [175]     | 100    | 0      | 0      |
| <i>Vandenboschia radicans</i>     | <i>Vandenboschia radicans</i>     | [86]      | 0      | 100    | 0      |
| <i>Vandenboschia radicans</i>     | <i>Vandenboschia radicans</i>     | [18]      | 100    | 0      | 0      |
| <i>Vandenboschia radicans</i>     | <i>Vandenboschia radicans</i>     | [87]      | 100    | 0      | 0      |
| <i>Vandenboschia radicans</i>     | <i>Trichomanes kunzeanum</i>      | [20]      | 100    | 0      | 0      |
| <i>Vandenboschia radicans</i>     | <i>Vandenboschia radicans</i>     | [20]      | 100    | 0      | 0      |
| <i>Vandenboschia radicans</i>     | <i>Vandenboschia radicans</i>     | [218]     | 100    | 0      | 0      |
| <i>Vandenboschia radicans</i>     | <i>Vandenboschia radicans</i>     | [44]      | 100    | 0      | 0      |
| <i>Vandenboschia radicans</i>     | <i>Vandenboschia radicans</i>     | [88]      | 0      | 0      | 100    |
| <i>Vandenboschia radicans</i>     | <i>Vandenboschia radicans</i>     | [89]      | 100    | 0      | 0      |
| <i>Vandenboschia radicans</i>     | <i>Vandenboschia radicans</i>     | [36]      | 100    | 0      | 0      |
| <i>Vandenboschia radicans</i>     | <i>Vandenboschia radicans</i>     | [36]      | 100    | 0      | 0      |
| <i>Vandenboschia radicans</i>     | <i>Vandenboschia radicans</i>     | [43]      | 100    | 0      | 0      |
| <i>Vandenboschia radicans</i>     | <i>Vandenboschia radicans</i>     | [94]      | 100    | 0      | 0      |
| <i>Vandenboschia radicans</i>     | <i>Vandenboschia radicans</i>     | [29]      | 85     | 15     | 0      |
| <i>Vandenboschia radicans</i>     | <i>Trichomanes radicans</i>       | [210]     | 50     | 50     | 0      |
| <i>Vandenboschia radicans</i>     | <i>Vandenboschia radicans</i>     | [155]     | 100    | 0      | 0      |
| <i>Vandenboschia radicans</i>     | <i>Vandenboschia radicans</i>     | [97]      | 100    | 0      | 0      |
| <i>Vandenboschia radicans</i>     | <i>Vandenboschia radicans</i>     | [65]      | 50     | 50     | 0      |
| <i>Vandenboschia radicans</i>     | <i>Vandenboschia radicans</i>     | [66]      | 50     | 50     | 0      |
| <i>Vandenboschia radicans</i>     | <i>Vandenboschia radicans</i>     | [98]      | 0      | 0      | 100    |
| <i>Vandenboschia radicans</i>     | <i>Vandenboschia radicans</i>     | [73]      | 95     | 0      | 5      |
| <i>Vandenboschia radicans</i>     | <i>Vandenboschia radicans</i>     | [99]      | 100    | 0      | 0      |
| <i>Vandenboschia radicans</i>     | <i>Vandenboschia radicans</i>     | [101]     | 50     | 50     | 0      |
| <i>Vandenboschia radicans</i>     | <i>Vandenboschia radicans</i>     | [104]     | 100    | 0      | 0      |
| <i>Vandenboschia rupestris</i>    | <i>Trichomanes rupestre</i>       | [143]     | 100    | 0      | 0      |
| <i>Vandenboschia rupestris</i>    | <i>Trichomanes rupestre</i>       | [18]      | 100    | 0      | 0      |
| <i>Vandenboschia rupestris</i>    | <i>Trichomanes rupestre</i>       | [20]      | 100    | 0      | 0      |
| <i>Vandenboschia rupestris</i>    | <i>Vandenboschia rupestris</i>    | [89]      | 100    | 0      | 0      |
| <i>Vandenboschia rupestris</i>    | <i>Trichomanes rupestre</i>       | [36]      | 50     | 50     | 0      |
| <i>Vandenboschia rupestris</i>    | <i>Vandenboschia rupestris</i>    | [43]      | 100    | 0      | 0      |
| <i>Vandenboschia rupestris</i>    | <i>Trichomanes rupestre</i>       | [94]      | 100    | 0      | 0      |
| <i>Vandenboschia rupestris</i>    | <i>Trichomanes rupestre</i>       | [29]      | 100    | 0      | 0      |
| <i>Vandenboschia rupestris</i>    | <i>Vandenboschia rupestris</i>    | [133]     | 0      | 100    | 0      |
| <i>Vandenboschia rupestris</i>    | <i>Trichomanes rupestre</i>       | [217]     | 0      | 50     | 50     |
| <i>Vandenboschia rupestris</i>    | <i>Vandenboschia rupestris</i>    | [101]     | 50     | 50     | 0      |
| <i>Vandenboschia speciosa</i>     | <i>Trichomanes speciosum</i>      | [20]      | 100    | 0      | 0      |
| <i>Vandenboschia speciosa</i>     | <i>Trichomanes speciosum</i>      | [202]     | 1      | 85     | 14     |
| <i>Vandenboschia speciosa</i>     | <i>Trichomanes speciosum</i>      | [204]     | 0      | 100    | 0      |
| <i>Vandenboschia speciosa</i>     | <i>Trichomanes speciosum</i>      | [220]     | 34     | 33     | 33     |
| <i>Vandenboschia speciosa</i>     | <i>Trichomanes speciosum</i>      | [205]     | 0      | 100    | 0      |
| <i>Vandenboschia striata</i>      | <i>Vandenboschia striata</i>      | [61]      | 0      | 100    | 0      |
| <i>Vandenboschia striata</i>      | <i>Vandenboschia striata</i>      | [53]      | 100    | 0      | 0      |
| <i>Vandenboschia subclathrata</i> | <i>Vandenboschia subclathrata</i> | [61]      | 0      | 100    | 0      |
| <i>Vandenboschia tubiflora</i>    | <i>Vandenboschia tubiflora</i>    | [110]     | 50     | 0      | 50     |

## References

20. Dubuisson, J.Y.; Hennequin, S.; Rakotondrainibe, F.; Schneider, H. Ecological diversity and adaptive tendencies in the tropical fern *Trichomanes* L. (Hymenophyllaceae) with special reference to climbing and epiphytic habits. *Bot. J. Linn. Soc.* **2003**, *142*, 41-63.
21. Lehnert, M.; Krug, M. Evolution of substrate specificity and fungal symbiosis in filmy ferns (Hymenophyllaceae): a Bayesian approach for ambiguous character state reconstruction. *Symbiosis* **2019**, *78*, 141-147, doi:10.1007/s13199-018-00594-z.
22. Brazilian Flora 2020 in construction. - available in: < <http://floradobrasil.jbrj.gov.br/> >,. Available online: (accessed on 15 May 2022).
23. Freitas, L.; Salino, A.; Menini Neto, L.; Almeida, T.; Mortara, S.; Stehmann, J.; Amorim, A.M.; Guimaraes, E.; A. Nadruz Coelho, M.; Zanin, A.; et al. A comprehensive checklist of vascular epiphytes of the Atlantic Forest reveals outstanding endemic rates. *PhytoKeys* **2016**, *58*, 65-79, doi:10.3897/phytokeys.58.5643.
24. Carvajal-Hernández, C.I.; Silva-Mijangos, L.; Kessler, M.; Lehnert, M. Additions to the pteridoflora of Tabasco, Mexico: the importance of the humid montane forest. *Acta Bot. Mex.* **2018**, *124*, 7-18, doi:10.21829/abm124.2018.1300.
25. Hennequin, S.; Schuettelpelz, E.; Pryer, K.M.; Ebihara, A.; Dubuisson, J.Y. Divergence times and the evolution of epiphytism in filmy ferns (Hymenophyllaceae) revisited. *Int. J. Plant Sci.* **2008**, *169*, 1278-1287, doi:10.1086/591983.
26. Werner, F.; Homeier, J.; Gradstein, S.R. Diversity of vascular epiphytes on isolated remnant trees in the montane forest belt of southern Ecuador. *Ecotropica* **2005**, *11*, 21-40.
27. Hassler, M. World Ferns. Synonymic Checklist and Distribution of Ferns and Lycophytes of the World **2004 - 2022**. Version 14.4; last update December 4th, 2022. - [www.worldplants.de/ferns/](http://www.worldplants.de/ferns/). (last accessed 12 December, 2022).
28. Bidin, A. A preliminary survey of the fern flora of Langkawi Islands. *Garden's Bull. Singapore* **1987**, *40*, 77-102.
29. Lellinger, D.B. Hymenophyllaceae. In *Flora of the Guianas*, Rijn, A.R.A.G.-v., Ed.; Koeltz Scientific Books: Königstein, 1994; Volume Ser. B, Fasc. 3, pp. 1-66.
36. Hokche, O.; Berry, P.E.; Huber, O., (Eds.) *Nuevo catálogo de la flora vascular de Venezuela*. Fundación Instituto Botánico de Venezuela: Caracas, Venezuela, 2008; p. 859.
37. Steyermark, J.A.; Berry, P.E.; Holst, B.K.; Yatskievych, K., (Eds.) *Flora of the Venezuelan Guayana: Pteridophytes, Spermatophytes Acanthaceae-Araceae*. Timber Press: 1995.
39. Flora of the Marquesas Islands. at <https://naturalhistory2.si.edu/botany/marquesasflora/index.htm>. Available online: (accessed on 12 December 2022).
40. Mellado-Mansilla, D.; Diaz, I.A.; Godoy-Guinao, J.; Ortega-Solis, G.; Moreno-Gonzalez, R. Bosque Pehuen Park's Flora: A contribution to the knowledge of the Andean montane forests in the Araucania region, Chile. *Natural Areas Journal* **2018**, *38*, 298-311, doi:10.3375/043.038.0410.
41. Moreno, R.; Le Quesne, C.; Díaz, I.; Rodríguez, R. Flora vascular del Parque Futangue, Region de Los Rios (Chile). *Gayana Botánica* **2013**, *70*, 121-135.
42. Chen, C.-C.; Hyvönen, J.; Schneider, H. Re-terrestrialization in the phylogeny of epiphytic plant lineages: Microsoroid ferns as a case study. *Journal of Systematics and Evolution* **2022**, *n/a*, doi:10.1111/jse.12899.
43. Kessler, M.; Smith, A.R. Prodrum of a fern flora for Bolivia. X. Hymenophyllaceae. *Phytotaxa* **2017**, *328*, 201-226, doi:10.11646/phytotaxa.328.3.1.
44. Espejo-Serna, A.; López-Ferrari, A.R.; Mendoza-Ruiz, A.; García-Cruz, J.; Ceja-Romero, J.; Pérez-García, B. Mexican vascular epiphytes: Richness and distribution. *Phytotaxa* **2021**, *503*, 1-124.
45. Acebey, A.R.; Krömer, T.; Kessler, M. Species richness and vertical distribution of ferns and lycophytes along an elevational gradient in Los Tuxtlas, Veracruz, Mexico. *Flora* **2017**, *235*, 83-91, doi:10.1016/j.flora.2017.08.003.
46. Bøgh, A. Composition and distribution of the vascular epiphyte flora of an Ecuadorian montane rain forest. *Selbyana* **1992**, *13*, 25-34.
48. Nitta, J.H.; Epps, M.J. Hemi-epiphytism in *Vandenboschia collariata* (Hymenophyllaceae). *Brittonia* **2009**, *61*, 392-397, doi:10.1007/s12228-009-9097-5.
50. Watkins Jr., J.E.; Moran, R.C. Gametophytes of the fern genera *Dracoglossum* and *Lomariopsis* (Lomariopsidaceae) and their phylogenetic significance. *International Journal of Plant Science* **2019**, *180*, 1004-1015.

53. Khine, P.K.; Fraser-Jenkins, C.; Lindsay, S.; Middleton, D.; Miehe, G.; Thomas, P.; Kluge, J. A contribution toward the knowledge of ferns and lycophytes from Northern and Northwestern Myanmar. *Am. Fern J.* **2017**, *107*, 219-256, doi:10.1640/0002-8444-107.4.219.
56. Roux, J.P. Synopsis of the Lycopodiophyta and Pteridophyta of Africa, Madagascar and neighbouring islands. *Strelitzia* **2009**, *23*.
57. Brownlie, G. The pteridophyte flora of Fiji. *Nova Hedwig Beihefte* **1977**, *55*, 1-397.
58. Iwatsuki, K. Taxonomic studies of pteridophyta II. *Acta Phytotaxonomica et Geobotanica* **1958**, *17*, 161-166.
59. Game, J.C.; Fawcett, S.E.; Smith, A.R. New pteridophyte records for Taveuni (Fiji) and a new species of Chingia (Thelypteridaceae). *NZ J. Bot.* **2018**, *56*, 26-37, doi:10.1080/0028825x.2017.1383276.
60. Nitta, J.H. Distribution, ecology, and systematics of the filmy ferns (Hymenophyllaceae) of Moorea, French Polynesia. *Water Resources Center Archives. Biology and Geomorphology of Tropical Islands* **2006**.
61. Liu, J.X.; Zhang, Q.Y.; A., E.; Iwatsuki, K. Hymenophyllaceae. In *Flora of China*, Vol. 2-3 (Pteridophytes), Wu, Z.Y., Raven, P.H., Hong, D.Y., Eds.; Beijing: Science Press. St. Louis: Missouri Botanical Garden Press., 2013; pp. 93-109
62. Cámara-Leret, R.; Frodin, D.G.; Adema, F.; Anderson, C.; Appelhans, M.S.; Argent, G.; Arias Guerrero, S.; Ashton, P.; Baker, W.J.; Barfod, A.S.; et al. New Guinea has the world's richest island flora. *Nature* **2020**, *584*, 579-583, doi:10.1038/s41586-020-2549-5.
63. Christensen, C. Botanical results of the Archbold Expedition No. 8: New and noteworthy Papuan ferns. *Brittonia* **1937**, *2*, 265-317.
64. Murdock, A.G.; Smith, A.R. Pteridophytes of Moorea, French Polynesia, with a new species, *Tmesipteris gracilis* (Psilotaceae). *Pacific Sci.* **2003**, *57*, 253-265.
65. Pichi Sermolli, R.E.G. A contribution to the knowledge of the Pteridophyta of Rwanda, Burundi, and Kivu (Zaire). I. *Bulletin du Jardin Botanique National de Belgique / Bulletin van de National Plantentuin van Belgique* **1983**, *53*, 177-284.
66. Roux, J.P. *Conspectus of southern African Pteridophyta: an enumeration of the Pteridophyta of Angola, Botswana, Lesotho, Malawi, Mozambique, Namibia, South Africa (including the Marion Island group), Swaziland, Zambia and Zimbabwe*; Project Coordinator, Southern African Botanical Diversity Network, c/o National Botanical Institute: Pretoria, 2001.
67. Roux, J.P.; Network, S.A.B.D. *Swaziland ferns and fern allies*; National Botanical Institute, SABONET: Pretoria, 2003; Volume 19.
68. Clarkson, B.D. The vegetation of the Kaitake Range Egmont National Park, New Zealand. *NZ J. Bot.* **1985**, *23*, 15-31.
69. Ebihara, A.; Matsumoto, S.; Iwashina, T.; Sugimura, K.; Iwatsuki, K. Hymenophyllaceae (Pteridophytes) of Vanuatu. *Annales Tsukuba Botanical Garden* **2002**, *21*, 61-72.
70. Dubuisson, J.Y.; Bauret, L.; Grall, A.; Li, T.; Ebihara, A.; Hennequin, S. Discussion on the taxonomy of African fern *Abrodictyum rigidum* (Sw.) Ebihara & Dubuisson and description of two new *Abrodictyum* C.Presl species (Hymenophyllaceae, Polypodiidae) for the Afro-Malagasy region. *Phytotaxa* **2016**, *284*, 151-168, doi:10.11646/phytotaxa.284.3.1.
71. Benl, G. The pteridophyta of Bioko (Fernando Po): (Contributions to a Flora of the island): II: Marattiaceae, Hymenophyllaceae, Adiantaceae, Hemionitidaceae. *Acta Botanica Barcinonensia* **1980**, 3-34.
72. Harley, W.J. The ferns of Liberia. *Contributions from the Gray Herbarium of Harvard University* **1955**, *177*, 58-101.
73. Velayos, M.; Aedo, C.; Cabezas, F.; Estrella, M. XIII - Hymenophyllaceae. In *Flora de Guinea Ecuatorial, I*, Velayos, M., Aedo, C., Cabezas, F., Estrella, M., Eds.; 2008; p. 28.
74. Iwatsuki, K.; Ebihara, A.; Kato, M. Taxonomic studies of pteridophytes of Ambon and Seram (Moluccas) collected on Indonesian-Japanese botanical expeditions 1983-1986. XIII. Hymenophyllaceae. *PhytoKeys* **2019**, *119*, 107-115, doi:10.3897/phytokeys.119.33565.
75. Turner, I.M. A catalogue of the vascular plants of Malaya. *Gardens' Bulletin, Singapore* **1995**, *47*, 1-757.
76. Piggott, A.G. *Ferns of Malaysia in colour* Tropical Press: Kuala Lumpur, 1988.
77. Becker, M. A preliminary survey of the fern flora of Penang Hill. *Flora Malesiana Bulletin* **1994**, *11*, 293-300.
78. Iwatsuki, K.; Price, M.G. The pteridophytes of Mt Burnay and vicinity, Northern Luzon. *The Southeast Asian Studies* **1977**, *14*, 540-572.
79. Lindsay, S.; Middleton, D.J. Ferns of Thailand, Laos and Cambodia. <http://rbg-web2.rbge.org.uk/thaiferns/>. **2012 onwards**.
80. Popelka, O.; Dančák, M.; Sukri, R.S.; Metali, F. Novitates Bruneienses, 10. Filmy ferns (Hymenophyllaceae) of Kuala Belalong, Brunei Darussalam. **2018**.
81. Sledge, W.A. The Hymenophyllaceae of Ceylon. *Journal of the Linnean Society of London, Botany* **1968**, *60*, 289-308, doi:10.1111/j.1095-8339.1968.tb00091.x.

82. Saïd, A.H.; Hennequin, S.; Rouhan, G.; Dubuisson, J.Y. Disentangling the diversity and taxonomy of Hymenophyllaceae (Hymenophyllales, Polypodiidae) in the Comoros. *European Journal of Taxonomy* **2017**, *313*.
83. Beentje, H.J. *Hymenophyllaceae*; Royal Botanic Gardens: Kew, 2008.
84. Blum, C.T.; Roderjan, C.V.; Galvao, F. Composição florística e distribuição altitudinal de epífitas vasculares da Floresta Ombrófila Densa na Serra da Prata, Morretes, Paraná, Brasil. *Biota Neotrop.* **2011**, *11*, 141-159.
85. Cetzal-Ix, W.; Noguera-Savelli, E.; Ramirez-Marcial, N. New records of ferns for Tabasco, Mexico. *Rev. Mex. Biodiv.* **2013**, *84*, 977-982, doi:10.7550/rmb.35605.
86. Christenhusz, M.J.M. Index Pteridophytorum Guadalupensium or a revised checklist to the ferns and club mosses of Guadeloupe (French West Indies). *Bot. J. Linn. Soc.* **2009**, *161*, 213-277.
87. Dittrich, V.A.d.O.; Waechter, J.L.; Salino, A. Species richness of pteridophytes in a montane Atlantic rain forest plot of Southern Brazil. *Acta Bot. Bras.* **2005**, *19*, 519-525.
88. Ferreira de Lima, R.A.; de Oliveira Dittrich, V.A.; de Souza, V.C.; Salino, A.; Breier, T.B.; de Aguiar, O.T. Flora vascular do Parque Estadual Carlos Botelho, São Paulo, Brasil. *Biota Neotrop.* **2011**, *11*, 173-214.
89. Gasper, A.L.d.; Sevegnani, L. Lycophyta e samambaias do Parque Nacional da Serra do Itajaí, Vale do Itajaí, SC, Brasil. *Hoehnea* **2010**, *37*, 755-767.
90. Grayum, M.H.; Churchill, H.W. The vascular flora of La Selva Biological Station, Costa Rica - Polypodiophyta. *Selbyana* **1989**, *11*, 66-118.
91. Haber, W. Appendix 1 - Vascular plants of Monteverde. In *Monteverde: Ecology and conservation of a tropical cloud forest*, Nadkarni, N.M., Whellwright, N., Eds.; Oxford University Press: New York, 2000; pp. 457-518.
92. Hyde, M.A.; Wursten, B.T.; Ballings, P.; Coates Palgrave, M. Flora of Zimbabwe: Home page. <https://www.zimbabweflora.co.zw/index.php>. **2019**.
93. Kornás, J. Life-forms and seasonal patterns in the pteridophytes in Zambia. *Acta Soc. Bot. Pol.* **1977**, *46*, 669-690.
94. Lellinger, D.B. *The ferns and fern-allies of Costa Rica, Panama, and the Chocó (Part I: Psilotaceae through Dicksoniaceae)*; American Fern Society: Washington, D.C., 1989; Volume 2a, p. 364.
95. Mori, S.A.; Cremers, G.; Gracie, C.; De Granville, J.-J.; Hoff, M.; Mitchell, J.D. *Pteridophytes, gymnosperms, and monocotyledons*; New York Botanical Garden: New York, 1997; Volume Pt. 1, p. 422 S.
96. Nitta, J.H.; Ebihara, A.; Smith, A.R. A taxonomic and molecular survey of the pteridophytes of the Nectandra Cloud Forest Reserve, Costa Rica. *Plos One* **2020**, *15*, doi:10.1371/journal.pone.0241231.
97. Nóbrega, G.A.; Aidar, M.P.M.; Paciencia, M.; Prado, J. Identification key for lycophytes and ferns from the Picinguaba and Santa Virginia Nuclei, Parque Estadual da Serra do Mar, Ubatuba, SP, Brazil. *Biota Neotrop.* **2016**, *16*, doi:10.1590/1676-0611-bn-2015-0144.
98. Shreve, F. Studies on Jamaican Hymenophyllaceae. *Bot. Gaz.* **1911**, *51*, 184-209.
99. Windisch, P.G. Pteridófitas do Estado de Mato Grosso: Hymenophyllaceae. *Bradea* **1996**, *6*, 400-423.
100. Schippers, R.R. Pteridophytes of Tanzania with special reference to Pare and Usambara Mountains *Fern Gaz.* **1993**, *14*, 171-192.
101. Windisch, P.G. Hymenophyllaceae (Polypodiopsida) no estado do Rio Grande do Sul. *Pesquisas, Botânica* **2014**, *65*, 15-48.
102. Graham, B.M.; Rickard, M.H. A revised list of the pteridophytes of Nevis. *Fern Gaz.* **1992**, *14*, 85-95.
103. Peña-Chocorro, M.C.; Jiménez, B.; Marín, G.; Knapp, S. Checklist of the pteridophytes of the Mbaracayú Forest Nature Reserve, Paraguay. *Fern Gaz.* **1999**, *15*, 221-258.
104. Peña-Chocarro, M.; Espada-Mateos, C.; Vera, M.; Céspedes, G.; Knapp, S. Updated checklist of vascular plants of the Mbaracayú Forest Nature Reserve (Reserva Natural del Bosque Mbaracayú), Paraguay. *Phytotaxa* **2010**, *12*, 1-224.
105. Monro, A.K.; Santamaria-Aguilar, D.; Gonzalez, F.; Chacon, O.; Solano, D.; Rodriguez, A.; Zamora, N.; Fedele, E.; Correa, M. A first checklist to the vascular plants of La Amistad International Park (PILA), Costa Rica-Panama. *Phytotaxa* **2017**, *322*, 1-283, doi:10.11646/phytotaxa.322.1.1.
106. Wilson, H.D. *Field Guide Stewart Island Plants*; Manuka Press: Christchurch, New Zealand, 1994.
107. Lellinger, D.B. Notes on neotropical Hymenophyllaceae. *Am. Fern J.* **1991**, *81*, 24-36.
108. Mildawati; Sobir, S.; Sulistijorini, S.; Chikmawati, T. The diversity of pteridophytes in Siberut National Park, Mentawai Islands, West Sumatra, Indonesia. *Biodiversitas* **2020**, *21*, 3200-3208.
109. Chambers, T.C.; Jermy, A.C.; Crabbe, J.A. A collection of ferns from Espiritu Santo, New Hebrides. *Fern Gaz.* **1971**, *10*, 175.
110. Flora of the Hawaiian Islands. at <https://naturalhistory2.si.edu/botany/hawaiianflora/index.htm>. Available online: (accessed on 12 November 2022)

111. Barcelona, J.F. The taxonomy and ecology of the pteridophytes of Mt. Iraya and vicinity, Batan Island, Batanes Province, Northern Philippines. In *Pteridology in the new millenium*; Springer: Dordrecht, 2003; pp. 299-325.
112. Cadet, T. La végétation de l'Île de la Réunion. Etude phytoécologique et phytosociologique. PhD Thesis, Université d'Aix-Marseille, St. Denis, La Réunion, 1977.
113. Dubuisson, J.Y.; Rouhan, G.; Grall, A.; Hennequin, S.; Senterre, B.; Pynee, K.; Ebihara, A. New insights into the systematics and evolution of the filmy fern genus *Crepidomanes* (Hymenophyllaceae) in the Mascarene Archipelago with a focus on dwarf species. *Acta Bot. Gall.* **2013**, *160*, 173-194, doi:10.1080/12538078.2013.819294.
114. Yuyen, Y.; Boonkerd, T. Pteridophyte flora of Huai Yang waterfall National Park, Prachuap Khiri Khan province, Thailand. *Nat. Hist. J. Chulalongkorn Univ.* **2002**, *2*, 39-49.
115. Chapman, J.D.; Chapman, H.M. *The forests of Taraba and Adamawa States, Nigeria. An ecological account and plant species checklist*; University of Canterbury: Christchurch, New Zealand, 2001; p. 146+175.
116. Fischer, E.; Rembold, K.; Althof, A.; Obholzer, J.; Malombe, I.; Mwachala, G.; Onyango, J.C.; Dumbo, B.; Theisen, I. Annotated checklist of the vascular plants of Kakamega Forest, Western Province, Kenya. *J. East African Nat. Hist.* **2010**, *99*, 129-226, doi:10.2982/028.099.0205.
117. Flora of Australia. Australian Biological Resources Study, Canberra. <http://www.ausflora.org.au>.
118. Game, J.C.; Pene, S.; Smith, A.R. A new specimen-based checklist of ferns and lycophytes from Rotuma (Fiji). *NZ J. Bot.* **2021**, *59*, 137-153, doi:10.1080/0028825X.2020.1775658.
119. Hameed, C.A.; Madhusoodanan, P.V. A new species of filmy fern (Hymenophyllaceae: Pteridophyta) from South India. *SIDA, Contr. Bot.* **1998**, *18*, 519-522.
120. Madhusoodanan, P.V.; Hameed, C.A. *Crepidomanes agasthianum*, a new filmy fern species (Hymenophyllaceae — Pteridophyta) from India. *Nord. J. Bot.* **1998**, *18*, 169-170.
121. Farrar, D.R. *Trichomanes intricatum*: The independent trichomanes gametophyte in the Eastern United States. *Am. Fern J.* **1992**, *82*, 68-74, doi:10.2307/1547382.
122. Trigoboff, N.; Li, F.W. *Crepidomanes intricatum* (Hymenophyllaceae), a sporophyte-less filmy fern new to Central New York. *Am. Fern J.* **2022**, *112*, 139-141.
123. Patil, S.M.; Hande, P.R.; Dongare, M.M. A filmy fern: *Crepidomanes latealatum* (Bosch) Copel. new to Northern Western Ghats of India. *Indian For.* **2014**, *140*, 939-940.
124. Chen, C.W.; Hsu, T.C.; Chao, Y.S.; Lu, P.F.; Li, C.W.; Tram, N.K.T.; Nguyen, I.; Dang, M.T.; Luu, H.T.; Parris, B. A newly recorded genus and twelve newly recorded species of ferns for Vietnam from Lang Biang Plateau. *Phytotaxa* **2020**, *443*, 121-143, doi:10.11646/phytotaxa.443.2.1.
125. Grieve, G.R.H.; Downs, C.T. A checklist of the plants of the forests and grasslands in the Weza district, southern KwaZulu-Natal and a review of their status in the Red Data List. *Koedoe* **2015**, *57*, 1237, doi:10.4102/koedoe.v57i1.1237.
126. Pynee, K.; Hennequin, S.; Echternacht, L.; Dubuisson, J.-Y. A new local variety of *Crepidomanes minutum* (Hymenophyllaceae) in the Mascarene Archipelago (Indian Ocean) and a new record for Mauritius. *Phytotaxa* **2012**, *62*, 25-30.
127. Faden, R.B. A new species of *Trichomanes* from Eastern Africa. *Am. Fern J.* **1977**, *67*, 5-10, doi:10.2307/1546194.
128. Price, M.G. Notes on Philippine ferns. *Fern Gaz.* **1972**, *10*, 253-262.
129. Joseph, J.; Singh, S. *Trichomanes saxifragoides* Presl (Hymenophyllaceae) - a new record of fern for North Eastern India from Tirap District, Arunachal Pradesh. *Bulletin of the Botanical Survey of India* **1981**, *21*, 213-214.
130. Lee, C.S.; Lee, K.; Hwang, Y. First record of *Crepidomanes schmidtianum* (Zenker ex Tasch.) K. Iwats. (Hymenophyllaceae) from Korea. *Korean J. Plant Tax.* **2014**, *44*, 1-5.
131. Bir, S.S.; V.Irudayaraj; Manickam, V.S. Cytology of some ferns from the Nilgiris, South India III *Fern Gaz.* **1996**, *15*, 141-149.
132. da Silva, W.R.; Ferreira, A.W.C.; Ilkiu-Borges, A.L.; Fernandes, R.S. Ferns and lycophytes of remnants in Amazonia Maranhense, Brazil. *Biota Neotrop.* **2020**, *20*, doi:10.1590/1676-0611-bn-2020-0972.
133. Matos, F.B.d. Samambaias e licófitas da RPPN Serra Bonita, município de Camacan, sul da Bahia, Brasil. 2009.
134. Wessels Boer, J.G. The new world species of *Trichomanes* sect. *Didymoglossum* and *Microgonium*. *Acta Bot. Neerl.* **1962**, *11*, 277-330.
135. Pichi Sermolli, R.E.G. *Microgonium erosum* and related species (Hymenophyllaceae) in continental Africa. *Webbia* **1982**, *35*, 241-260, doi:10.1080/00837792.1982.10670223.

136. Senterre, B.; Rouhan, G.; Morel, C.; Dubuisson, J.Y. New species and records in the fern genus *Didymoglossum* for the flora of Seychelles, with notes on the Southeast Asian *D. motleyi* complex (Hymenophyllaceae). *Phytotaxa* **2017**, *292*, 201-217.
137. Croxall, J.P. *Microgonium* (Hymenophyllaceae) in Malesia, with special reference to Peninsular Malaysia. *Kew Bull.* **1986**, *41*, 519-531, doi:10.2307/4103113.
138. Palacios-Rios, M. Pteridophytes of the state of Veracruz, Mexico: new records. *Fern Gaz.* **1992**, *14*, 119-122.
139. Sánchez, C. A new filmy fern species and new unispecific section of *Trichomanes* (Hymenophyllaceae) ("filmy ferns") from Cuba. *Willdenowia* **2001**, *31*, 125-127.
140. Croat, T.B. *Flora of Barro Colorado Island*; Stanford University Press: Stanford, 1978; p. 943.
141. Christensen, C. XIX. - On the ferns of the Seychelles and the Aldabra Group *Transactions of the Linnean Society of London -Second Series Botany* **1912**, *VII*, 409-424.
142. Senterre, B.; Gerlach, J.; Mougat, J.; Matatiken, D. Old growth mature forest types and their floristic composition along the altitudinal gradient on Silhouette Island (Seychelles) - the telescoping effect on a continental mid-oceanic island. *Phytocoen.* **2009**, *39*, 157-174, doi:doi:10.1127/0340-269X/2009/0039-0157.
143. Cascante-Marín, A.; Estrada-Chavarría, A. Las plantas vasculares de El Rodeo, Costa Rica. *Brenesia* **2012**, *77*, 71-128.
144. Hameed, C.A.; Madhusoodanan, P.V. *Trichomanes vamana*, a new filmy fern species (Hymenophyllaceae-Pteridophyta) from India. *Nord. J. Bot.* **2005**, *23*, 437-439, doi:10.1111/j.1756-1051.2003.tb00417.x.
145. Acebey, A.R.; Lopez-Acosta, J.C.; Tejero-Diez, J.D.; Krömer, T. Richness and composition of ferns and lycophytes in three areas of humid montane forest in Los Tuxtlas, Veracruz, Mexico. *Rev. Mex. Biodiv.* **2017**, *88*, 625-635, doi:10.1016/j.rmb.2017.07.009.
146. Arana, M.D.; Larsen, C.; Ponce, M.M. Revisión y análisis panbiogeográfico de las Hymenophyllaceae de las Yungas meridionales de Argentina (Selva Tucumano-Boliviana). *Rodriguésia* **2016**, *67*, 55-76, doi:10.1590/2175-7860201667105.
147. Trusty, J.L.; Kesler, H.C.; Delgado, G.H. Vascular flora of Isla del Coco, Costa Rica. *Proc. Calif. Acad. Sci.* **2006**, *57*, 247-355.
148. Kornás, J. Notes on African Hymenophyllaceae 2. *Trichomanes lenormandii* v. d. Bosch New to Continental Africa. *Bulletin du Jardin botanique national de Belgique / Bulletin van de National Plantentuin van België* **1976**, *46*, 393-397, doi:10.2307/3667720.
149. Bragança Guarnier, G.; al., e. Checklist preliminar da biodiversidade de pteridófitas do Parque Natural Municipal do Curió. In *Parque do Curió*, Frago, M.E., Ed.; Missão Asa Editorial: 2020; pp. 43-54.
150. Lellinger, D.B. *A field manual to the ferns and fern-allies of the United States and Canada*; Smithsonian Institution Press: Washington, D.C., 1985; p. 389.
151. Prado, J.; Moran, R.C. Checklist of the ferns and lycophytes of Acre State, Brazil. *Fern Gaz.* **2009**, *18*, 230-263.
152. Tardieu-Blot, M.L. Sur quelques Hymenophyllaceae des îles Mascareignes. *Adansonia sér. 2* **1977**, *17*, 147-150.
153. Farrar, D.R.; Parks, J.C.; McAlpin, B.W. The fern genera *Vittaria* and *Trichomanes* in the northeastern United States. *Rhodora* **1983**, *85*, 83-92.
154. Pinson, J.B.; Chambers, S.M.; Sessa, E.B. *Vittaria graminifolia* (Pteridaceae) and *Didymoglossum petersii* (Hymenophyllaceae) in Broxton Rocks, GA. *Am. Fern J.* **2017**, *107*, 257-264, doi:10.1640/0002-8444-107.4.257.
155. Martínez-Meléndez, N.; Perez-Farrera, M.A.; Martínez-Camilo, R. The vascular epiphyte flora of El Triunfo biosphere reserve, Chiapas, México. *Rhodora* **2009**, *111*, 503-535.
156. Fosberg, F.R.; Sachet, M.-H. Systematic studies of Micronesian plants. *Smiths. Contr. Bot.* **1980**, 1-40.
157. León, B. Hymenophyllaceae endémicas del Perú. *Rev. Peru. Biol.* **2006**, *13*, 903-904.
158. Kessler, M.; Smith, A.R.; Sundue, M. Three new Andean species of *Hymenophyllum* (Hymenophyllaceae-Pteridophyta). *Blumea* **2005**, *50*, 555-559.
159. Kirby, C. *Field guide to New Zealand's epiphytes, vines & mistletoes* Environmental Research Institute, University of Waikato: Hamilton, NZ, 2014.
160. Oliver, W.R.B. New Zealand epiphytes. *J. Ecol.* **1930**, *18*, 1-50.
161. Gonzatti, F.; Windisch, P.G. Flora of Espírito Santo: *Hymenophyllum* (Hymenophyllaceae). *Rodriguésia* **2018**, *69*, 611-629.
162. Benson, D.; McDougall, L. Ecology of Sydney plant species Part 1: Ferns, fern-allies, cycads, conifers and dicotyledon families Acanthaceae to Asclepiadaceae. *Cunninghamia* **1993**, *3*, 257-422.
163. Jarman, S.J.; Kantvilas, G.; Brown, M.J. The ecology of pteridophytes in Tasmanian cool temperate rainforest. *Fern Gaz.* **1986**, *13*, 77-86.
164. Brass, L.J. Ferns of a New Guinea gully. *Am. Fern J.* **1953**, *43*, 150-158.

165. Nwe, T.Y.; Zhang, X.-C. Taxonomic studies of lycophytes and ferns from the Pan-Himalaya (I): *Hymenophyllum* (Hymenophyllaceae). *Turczaninowia* **2017**, *20*, 75-96.
166. Chen, C.W.; Ebihara, A.; Cheng, K.Y.; Hsu, T.C.; Huang, Y.M.; Dang, V.D.; Luu, H.T.; Le, V.S.; Li, C.W. Studies of Vietnamese pteridophyte flora 1. *Syst. Bot.* **2021**, *46*, 573-581, doi:10.1600/036364421x16312067913507.
167. Larsen, C.; Ponce, M.M.; Scataglini, M.A. Revisión de las especies de *Hymenophyllum* (Hymenophyllaceae) del sur de Argentina y Chile. *Gayana. Bot.* **2013**, *70*, 275-330, doi:10.4067/s0717-66432013000200009.
168. Carvalho, F.A.; Salino, A.; Zartman, C.E. New country and regional records from the Brazilian side of Neblina Massif. *Am. Fern J.* **2012**, *102*, 228-232.
169. Gonzatti, F.; Windisch, P.G.; Scariot, F.J.; Echeverrigaray, S.; Ritter, M.R. Revision of *Hymenophyllum* subg. *Sphaerocionium* (Hymenophyllaceae) in the Atlantic Forest domain (Brazil), based on molecular and morphological evidence. *Syst. Bot.* **2020**, *45*, 707-748, doi:10.1600/036364420x16033962925150.
170. Kornás, J. Filmy ferns (Hymenophyllaceae) of Central Africa (Zaire, Rwanda, Burundi). 1. *Hymenophyllum*. *Fragmenta Flor. Geobot. Polonica* **1993**, *38*, 3-19.
171. Diem, J.; Lichtenstein, J.S.D. Las Himenofiláceas del área argentino-chilena del sur. *Darwiniana* **1959**, *11*, 611-760, doi:10.2307/23212151.
172. Larsen, C.; Gonzatti, F.; Acosta, J.M.; Ponce, M.M. Morphological and molecular evidence to segregate a disjunct species of *Hymenophyllum* (Hymenophyllaceae) from Southern South America. *Syst. Bot.* **2020**, *45*, 439-449, doi:10.1600/036364420x15935294613482.
173. Pincheira-Ulbrich, J.; Zambrano, U.; Urrutia-Estrada, J. New record of *Hymenophyllum caudatum* Bosch (Polypodiopsida, Hymenophyllaceae) extends the mainland distribution in the coastal Mediterranean Forest of South America. *Biodiv. Data J.* **2022**, *10*, doi:10.3897/BDJ.10.e84169.
174. Larsen, C.; Arana, M.D.; Acosta, J.M.; Ponce, M.M. Two new species segregated from *Hymenophyllum tunbrigense* (Hymenophyllaceae) in southern South America, based on morphological, anatomical, molecular and distributional evidence. *Phytotaxa* **2017**, *303*, 218-232, doi:10.11646/phytotaxa.303.3.2.
175. Carvajal-Hernández, C.I.; Krömer, T. Riqueza y distribución de helechos y licófitos en el gradiente altitudinal del Cofre de Perote, centro de Veracruz, México. *Bot. Sci.* **2015**, *93*, 601-614.
176. Christenhusz, M.J.; Schwartsburd, P.B.; Labiak, P.H. *Hymenophyllum filmenofilicum* (Hymenophyllaceae, Pteridophyta): a new epipetric filmy fern from Paraná, southern Brazil. *Kew Bull.* **2009**, *64*, 175-178.
177. Manickam, V.S. Rare and endangered ferns of the Western Ghats of South India. *Fern Gaz.* **1995**, *15*, 1-10.
178. Hsu, T.C.; Huang, Y.F.; Chao, Y.S. Systematics of *Hymenophyllum* subgenus *Mecodium* (Hymenophyllaceae) in Taiwan. *Syst. Bot.* **2019**, *44*, 753-767, doi:10.1600/036364419x15710776741413.
179. Godley, E.J. The flora of Antipodes Island. *NZ J. Bot.* **1989**, *27*, 531-564, doi:10.1080/0028825X.1989.10414138.
180. Olivera Tarifeño, C.M.; Ramos Sandoval, J.D. Determinación taxonomica, distribucion y descripcion de los helechos (Div. Pteridophyta) en el Parque Nacional de Cutervo. Cutervo–Region Cajamarca. Lic., Lambayeque, Peru, 2014.
181. Singh, B.; Singh, V.N.; Phukan, S.J.; Sinha, B.K.; Borthakur, S.K. Contribution to the pteridophytic flora of India: Nokrek Biosphere Reserve, Meghalaya. *J. Threatened Taxa* **2012**, *4*, 2277-2294.
182. Fowler, R.L. Annotated list of ferns of the Kilauea-Mauna Loa Section of Hawaii National Park. *Am. Fern J.* **1940**, *30*, 9-18.
183. Ebihara, A. Hymenophyllaceae collected in the Mt. Kinabalu Area in 2000 and 2007. *Mem. Nat. Mus. Nat. Sci.* **2008**, *45*, 105-110.
184. Copeland, E.B. Papuan pteridophytes collected for the Arnold Arboretum by LJ Brass. *J. Arnold Arb.* **1929**, *10*, 174-182.
185. Gibby, M.; Lovis, J.D. New ferns of Madeira. *Fern Gaz.* **1989**, *13*, 285-290.
186. Fineran, B.A. A botanical survey of seven mutton-bird islands, south-west Stewart Island. *Journal of the Royal Society of New Zealand* **1973**, *3*, 475-525.
187. Ríos S., R.; Rincón G., R.R.; Santos M., M. *Guía de helechos y plantas afines del Parque Nacional Volcán Barú*; SENACYT: Panama, 2016.
188. Rio, C.D.; Hennequin, S.; Rouhan, G.; Ebihara, A.; Lowry II, P.P.; Dubuisson, J.-Y.; Gaudeul, M. Origins of the fern genus *Hymenophyllum* (Hymenophyllaceae) in New Caledonia: Multiple independent colonizations from surrounding territories and limited *in situ* diversification. *Taxon* **2017**, *66*, 1041-1064, doi:10.12705/665.4.
189. Barcelona, J.F. Preliminary report on the ferns and fern allies (pteridophytes) of Mt. Bali-it, Balbalasang-Balbalan National Park, Kalinga, Northern Luzon, Philippines. *Sylvatrop* **2003**.
190. Ebihara, A.; Iwatsuki, K.; Ohsawa, T.A.; Ito, M. *Hymenophyllum paniense* (Hymenophyllaceae), a new species of filmy fern from New Caledonia. *Syst. Bot.* **2003**, *28*, 228-235.



191. Lindsay, S.; Middleton, D.J.; Saengrit, S. *Hymenophyllum pilosissimum* C. Chr.(Hymenophyllaceae), a new record for Thailand. *Thai Forest Bull. (Botany)* **2014**, 48-51.
192. Moore, S.-J.; Chen, C.-M.; Wang, J.-C. *Hymenophyllum pilosissimum* C. Chr. (Hymenophyllaceae), a new recorded fern from Taiwan. *Am. Fern J.* **2010**, 100, 180-183, doi:10.1640/0002-8444-100.3.180.
193. Perrie, L.R.; Shepherd, L.D.; de Lange, P.J.; Batty, E.L.; Ohlsen, D.J.; Bayly, M.J.; Brownsey, P.J. *Hymenophyllum pluviatile*, a new and uncommon fern from New Zealand. *NZ J. Bot.* **2013**, 51, 308-320, doi:10.1080/0028825x.2013.834830.
194. Fall, P.L.; Drezner, T.D. Vascular plant species of the Kingdom of Tonga by vegetation type, species origin, growth form, and dispersal mechanism. *Ecology* **2020**, 101, e02902, doi:10.1002/ecy.2902.
195. Janzen, D.H.; Liesner, R. Annotated check-list of plants of lowland Guanacaste Province, Costa Rica, exclusive of grasses and non-vascular cryptogams. *Brenesia* **1980**, 18, 15-90.
196. Klein, V.P.; Demarchi, L.O.; Quaresma, A.C.; Cruz, J.d.; Piedade, M.T.F. The vascular epiphyte flora in a white-sand ecosystem of the Uatumã Sustainable Development Reserve, Central Amazon. *Check List* **2022**, 18, 157-186, doi:10.15560/18.1.157.
197. Meave, J.A.; Rincon-Gutierrez, A.; Ibarra-Manriquez, G.; Gallardo-Hernandez, C.; Romero-Romero, M.A. Checklist of the vascular flora of a portion of the hyper-humid region of La Chinantla, Northern Oaxaca Range, Mexico. *Bot. Sci.* **2017**, 95, 722-759, doi:10.17129/botsci.1812.
198. Sánchez Villaverde, C. Tres nuevas especies de Hymenophyllaceae para Cuba. *Rev. Jard. Bot. Nac.* **1987**, 8, 9-16.
199. Perrie, L.R.; Shepherd, L.D.; Brownsey, P.J.; Larraín, J.; Shaw, B.; Thouvenot, L.; von Konrat, M. Rediscovery and reinstatement of the New Caledonian endemic filmy fern *Hymenophyllum pumilio* Rosenst. *NZ J. Bot.* **2016**, 54, 1-10, doi:10.1080/0028825X.2015.1100640.
200. Dubuisson, J.Y.; Hennequin, S.; Droissart, V. *Hymenophyllum senterreanum* Dubuisson & Deblauwe, sp. nov.(Hymenophyllaceae) and its relatives in western Central Africa. *Phytotaxa* **2016**, 257, 287-294.
201. Rojas-Alvarado, A.F. Una especie nueva de *Hymenophyllum* y una variedad nueva de *Trichomanes collariatum* Bosch (Filicales: Hymenophyllaceae) en Costa Rica. *Lankesteriana* **2004**, 4, 143-148.
202. Ratcliffe, D.A.; Birks, H.J.B.; BIRKS, H.H. The ecology and conservation of the Killarney fern *Trichomanes speciosum* WILLD. in Britain and Ireland. *Biol. Conserv.* **1993**, 66, 231-247.
203. Richards, P.W.; Evans, G.B. Biological flora of the British Isles *Hymenophyllum*. *J. Ecol.* **1972**, 60, 245-268.
204. Wilmanns, O.; Rasbach, H. Observations on the pteridophytes of Sao Miguel, Acores. *Fern Gaz.* **1973**, 10, 315-329.
205. Willmot, A. An ecological survey of the ferns of the Killarney District, Co. Kerry, Ireland. *Brit. Fern Gaz.* **1983**, 12, 249.
206. Aguiar, S.; Herrero, A.; Quintanilla, L.G. Confirmación citológica de la presencia de *Hymenophyllum wilsonii* en España. *Lazaroa* **2006**, 27, 129.
207. Sánchez Velázquez, T. *Hymenopyllum wilsonii* Hook. (Pteridophyta, Hymenophyllaceae). Confirmación de su presencia en las Islas Canarias. *Botanica Macaronésica* **2003**, 24, 207-211.
208. Rasbach, H.; Rasbach, K.; Bennert, H.W. New records and new cytological results for the fern flora of Madeira. *Brit. Fern Gaz.* **1990**, 13, 391.
209. Lee, C.S.; Lee, K.; Lee, S.G.; Ebihara, A. A new taxon of *Hymenophyllum* (Hymenophyllaceae): *H. wrightii* f. *serratum*. *Korean Journal of Plant Taxonomy* **2014**, 44, 233-237.
210. Mallmann, I.T.; Schmitt, J.L. Richness and floristic composition of the fern community in riparian forest of the river 'Cadeia', in Rio Grande do Sul state, Brazil. *Ciencia Florest.* **2014**, 24, 97-109.
211. Ponce, M.M.; Del Rio, C.; Ebihara, A.; Dubuisson, J.Y. Discussion on taxonomy of the fern genera *Crepidomanes* and *Polyphlebium* (Hymenophyllaceae) in Argentina and south-eastern South America, and description of a new local variety for *Crepidomanes pyxidiferum*. *Bot. Letters* **2017**, 164, 5-18, doi:10.1080/23818107.2016.1263581.
212. Croxall, J.P. The Hymenophyllaceae of Queensland. *Austr. J. Bot.* **1975**, 23, 509-547.
213. Windisch, P.G. *Trichomanes crispum* L. (Pteridophyta, Hymenophyllaceae) and allied species. *Bradea* **1992**, VI, 78-117.
214. Bauret, L.; Grall, A.; Senterre, B.; Rouhan, G.; Hennequin, S.; Ebihara, A.; Dubuisson, J.-Y. New circumscription of *Trichomanes cupressoides* Desvaux (Hymenophyllaceae), an endemic filmy fern from the Seychelles (Indian Ocean), and new insights into the genus *Abrodictyum* C.Presl in the western Indian Ocean. *Phytotaxa* **2015**, 202, 14, doi:10.11646/phytotaxa.202.1.1.
215. Rojas-Alvarado, A.F. Novelties in *Trichomanes* I. From Colombia. *Caldasia* **2009**, 31, 9-11.
216. Moran, R.C. *Trichomanes resinosum* (Hymenophyllaceae), a new species from southern Venezuela and adjacent Guyana. *Brittonia* **2000**, 52, 238-240, doi:10.2307/2666573.

217. Pacheco, L. *Trichomanes ribae* (Hymenophyllaceae), a new filmy fern from Costa Rica and Panama. *Am. Fern J.* **2002**, 92, 294-295, 292.
218. Ebihara, A.; Matsumoto, S.; Ito, M. Taxonomy of the reticulate *Vandenboschia radicans* complex (Hymenophyllaceae) in Japan. *Acta Phytotax. Geobot.* **2009**, 60, 26-40.
219. Bidin, A.A.; Jaman, R. The pteridophytes of Tawau Hills Park, Sabah. *ASEAN Rev. Biodiv. Environ. Cons. (ARBEC)* **1999**, 1, 1-11.
220. Ward, C.M. The pteridophytes of Flores (Açores): a survey with bibliography. *Brit. Fern Gaz.* **1970**, 10, 119-126.
221. Vumba Nature (<http://www.vumba-nature.com/>) (accessed on 12 October 2022)
222. [herbario.zamorano.edu/handle/11036/1677](http://herbario.zamorano.edu/handle/11036/1677) (accessed on 10 October 2022)
223. <https://fm-digital-assets.fieldmuseum.org/1140/158/C0628078F.jpg> (accessed on 12 October 2022)
