# Supplementary material
Source: MDPI journal article supplement (https://www.mdpi.com/1424-2818/15/2/270)
Supplement: s1 [file s1 › Table S2.pdf]

**Table S2.** Mean growth preference values for 450 species for epiphytic (EV), lithophytic (LV) and terrestrial growth (TV).

| Species name                         | EV (%) | LV (%) | TV (%) |
|--------------------------------------|--------|--------|--------|
| <i>Abrodactyum angustimarginatum</i> | 0      | 0      | 100    |
| <i>Abrodactyum asae-grayi</i>        | 17     | 0      | 83     |
| <i>Abrodactyum boninense</i>         | 100    | 0      | 0      |
| <i>Abrodactyum caespifrons</i>       | 0      | 0      | 100    |
| <i>Abrodactyum caudatum</i>          | 75     | 0      | 25     |
| <i>Abrodactyum cellulosum</i>        | 42     | 16     | 42     |
| <i>Abrodactyum clathratum</i>        | 50     | 0      | 50     |
| <i>Abrodactyum cumingii</i>          | 100    | 0      | 0      |
| <i>Abrodactyum dentatum</i>          | 0      | 0      | 100    |
| <i>Abrodactyum dregei</i>            | 0      | 50     | 50     |
| <i>Abrodactyum elongatum</i>         | 0      | 50     | 50     |
| <i>Abrodactyum extravagans</i>       | 0      | 0      | 100    |
| <i>Abrodactyum flavofuscum</i>       | 75     | 0      | 25     |
| <i>Abrodactyum francae</i>           | 0      | 0      | 100    |
| <i>Abrodactyum guineense</i>         | 0      | 0      | 100    |
| <i>Abrodactyum idoneum</i>           | 25     | 0      | 75     |
| <i>Abrodactyum laetum</i>            | 0      | 0      | 100    |
| <i>Abrodactyum obscurum</i>          | 0      | 32     | 68     |
| <i>Abrodactyum pachyphlebium</i>     | 0      | 0      | 100    |
| <i>Abrodactyum parviflorum</i>       | 21     | 0      | 79     |
| <i>Abrodactyum pseudorigidum</i>     | 0      | 25     | 75     |
| <i>Abrodactyum rigidum</i>           | 10     | 18     | 72     |
| <i>Abrodactyum schlechteri</i>       | 38     | 12     | 50     |
| <i>Abrodactyum setaceum</i>          | 0      | 0      | 100    |
| <i>Abrodactyum sprucei</i>           | 17     | 19     | 64     |
| <i>Abrodactyum strictum</i>          | 0      | 0      | 100    |
| <i>Abrodactyum tamarisciforme</i>    | 50     | 0      | 50     |
| <i>Abrodactyum windischianum</i>     | 0      | 50     | 50     |
| <i>Callistopteris apiifolia</i>      | 2      | 11     | 87     |
| <i>Callistopteris baldwinii</i>      | 0      | 0      | 100    |

| Species name                       | EV (%) | LV (%) | TV (%) |
|------------------------------------|--------|--------|--------|
| <i>Callistopteris polyantha</i>    | 0      | 0      | 100    |
| <i>Callistopteris superba</i>      | 0      | 0      | 100    |
| <i>Cephalomanes atrovirens</i>     | 0      | 0      | 100    |
| <i>Cephalomanes crassum</i>        | 0      | 0      | 100    |
| <i>Cephalomanes densinervium</i>   | 0      | 0      | 100    |
| <i>Cephalomanes javanicum</i>      | 11     | 27     | 62     |
| <i>Cephalomanes singaporianum</i>  | 0      | 17     | 83     |
| <i>Crepidomanes africanum</i>      | 94     | 1      | 5      |
| <i>Crepidomanes aphlebioides</i>   | 60     | 40     | 0      |
| <i>Crepidomanes assimilis</i>      | 100    | 0      | 0      |
| <i>Crepidomanes bilabiatum</i>     | 33     | 67     | 0      |
| <i>Crepidomanes bipunctatum</i>    | 65     | 35     | 0      |
| <i>Crepidomanes bonapartei</i>     | 85     | 15     | 0      |
| <i>Crepidomanes brevipes</i>       | 50     | 40     | 10     |
| <i>Crepidomanes campanulatum</i>   | 75     | 25     | 0      |
| <i>Crepidomanes chevalieri</i>     | 77     | 22     | 1      |
| <i>Crepidomanes christii</i>       | 72     | 28     | 0      |
| <i>Crepidomanes clarenceanum</i>   | 77     | 23     | 0      |
| <i>Crepidomanes draytonianum</i>   | 50     | 42     | 8      |
| <i>Crepidomanes fallax</i>         | 74     | 25     | 1      |
| <i>Crepidomanes frappieri</i>      | 62     | 38     | 0      |
| <i>Crepidomanes grande</i>         | 0      | 50     | 50     |
| <i>Crepidomanes humile</i>         | 65     | 29     | 6      |
| <i>Crepidomanes inopinatum</i>     | 69     | 31     | 0      |
| <i>Crepidomanes intermedium</i>    | 33     | 0      | 67     |
| <i>Crepidomanes intramarginale</i> | 100    | 0      | 0      |
| <i>Crepidomanes intricatum</i>     | 0      | 100    | 0      |
| <i>Crepidomanes kurzii</i>         | 60     | 40     | 0      |
| <i>Crepidomanes latealatum</i>     | 62     | 33     | 5      |
| <i>Crepidomanes latemarginale</i>  | 0      | 100    | 0      |
| <i>Crepidomanes makinoi</i>        | 100    | 0      | 0      |
| <i>Crepidomanes megistostomum</i>  | 50     | 50     | 0      |

| Species name                      | EV (%) | LV (%) | TV (%) |
|-----------------------------------|--------|--------|--------|
| <i>Crepidomanes melanotrichum</i> | 60     | 40     | 0      |
| <i>Crepidomanes mettenii</i>      | 75     | 25     | 0      |
| <i>Crepidomanes minutum</i>       | 64     | 33     | 1      |
| <i>Crepidomanes parvifolium</i>   | 33     | 67     | 0      |
| <i>Crepidomanes parvulum</i>      | 79     | 20     | 1      |
| <i>Crepidomanes ramitrichum</i>   | 77     | 23     | 0      |
| <i>Crepidomanes rothertii</i>     | 100    | 0      | 0      |
| <i>Crepidomanes rupicola</i>      | 35     | 65     | 0      |
| <i>Crepidomanes ruwenzoriense</i> | 100    | 0      | 0      |
| <i>Crepidomanes saxifragoides</i> | 50     | 50     | 0      |
| <i>Crepidomanes schmidianum</i>   | 70     | 30     | 0      |
| <i>Crepidomanes teysmannii</i>    | 100    | 0      | 0      |
| <i>Crepidomanes thysanostomum</i> | 0      | 37     | 63     |
| <i>Crepidomanes trinerve</i>      | 63     | 36     | 1      |
| <i>Crepidomanes vitiense</i>      | 64     | 24     | 12     |
| <i>Didymoglossum angustifrons</i> | 76     | 21     | 3      |
| <i>Didymoglossum ballardianum</i> | 76     | 16     | 8      |
| <i>Didymoglossum beaverianum</i>  | 0      | 100    | 0      |
| <i>Didymoglossum beccarianum</i>  | 100    | 0      | 0      |
| <i>Didymoglossum benlii</i>       | 0      | 100    | 0      |
| <i>Didymoglossum berterianum</i>  | 50     | 50     | 0      |
| <i>Didymoglossum bimarginatum</i> | 55     | 41     | 4      |
| <i>Didymoglossum bucinatum</i>    | 50     | 50     | 0      |
| <i>Didymoglossum caluffii</i>     | 100    | 0      | 0      |
| <i>Didymoglossum chamaedrys</i>   | 63     | 37     | 0      |
| <i>Didymoglossum cultratum</i>    | 96     | 4      | 0      |
| <i>Didymoglossum curtii</i>       | 92     | 8      | 0      |
| <i>Didymoglossum cuspidatum</i>   | 67     | 33     | 0      |
| <i>Didymoglossum ekmanii</i>      | 89     | 11     | 0      |
| <i>Didymoglossum erosum</i>       | 67     | 27     | 6      |
| <i>Didymoglossum exiguum</i>      | 33     | 67     | 0      |
| <i>Didymoglossum fulgens</i>      | 50     | 50     | 0      |

| Species name                        | EV (%) | LV (%) | TV (%) |
|-------------------------------------|--------|--------|--------|
| <i>Didymoglossum godmanii</i>       | 100    | 0      | 0      |
| <i>Didymoglossum gourlianum</i>     | 100    | 0      | 0      |
| <i>Didymoglossum henzaianum</i>     | 67     | 0      | 33     |
| <i>Didymoglossum hildebrandtii</i>  | 100    | 0      | 0      |
| <i>Didymoglossum hymenoides</i>     | 73     | 21     | 6      |
| <i>Didymoglossum kapplerianum</i>   | 56     | 31     | 13     |
| <i>Didymoglossum kirkii</i>         | 83     | 17     | 0      |
| <i>Didymoglossum kraussii</i>       | 79     | 17     | 4      |
| <i>Didymoglossum lehmannii</i>      | 100    | 0      | 0      |
| <i>Didymoglossum lenormandii</i>    | 73     | 17     | 10     |
| <i>Didymoglossum liberiense</i>     | 100    | 0      | 0      |
| <i>Didymoglossum lineolatum</i>     | 60     | 40     | 0      |
| <i>Didymoglossum lorencei</i>       | 25     | 75     | 0      |
| <i>Didymoglossum melanopus</i>      | 100    | 0      | 0      |
| <i>Didymoglossum membranaceum</i>   | 44     | 38     | 18     |
| <i>Didymoglossum mindorense</i>     | 84     | 4      | 12     |
| <i>Didymoglossum montanum</i>       | 100    | 0      | 0      |
| <i>Didymoglossum motleyi</i>        | 94     | 6      | 0      |
| <i>Didymoglossum nummularium</i>    | 81     | 19     | 0      |
| <i>Didymoglossum ovale</i>          | 66     | 31     | 3      |
| <i>Didymoglossum petersii</i>       | 45     | 41     | 14     |
| <i>Didymoglossum pinnatinervium</i> | 100    | 0      | 0      |
| <i>Didymoglossum punctatum</i>      | 64     | 25     | 11     |
| <i>Didymoglossum pusillum</i>       | 90     | 10     | 0      |
| <i>Didymoglossum reptans</i>        | 65     | 28     | 7      |
| <i>Didymoglossum rhipidophyllum</i> | 100    | 0      | 0      |
| <i>Didymoglossum rotundifolium</i>  | 75     | 25     | 0      |
| <i>Didymoglossum sublimbatum</i>    | 56     | 38     | 6      |
| <i>Didymoglossum tahitense</i>      | 81     | 19     | 0      |
| <i>Didymoglossum wallii</i>         | 33     | 67     | 0      |
| <i>Hymenophyllum abruptum</i>       | 86     | 0      | 14     |
| <i>Hymenophyllum acanthoides</i>    | 58     | 42     | 0      |

| Species name                      | EV (%) | LV (%) | TV (%) |
|-----------------------------------|--------|--------|--------|
| <i>Hymenophyllum acutum</i>       | 100    | 0      | 0      |
| <i>Hymenophyllum adiantoides</i>  | 100    | 0      | 0      |
| <i>Hymenophyllum aeruginosum</i>  | 50     | 50     | 0      |
| <i>Hymenophyllum amabile</i>      | 100    | 0      | 0      |
| <i>Hymenophyllum angustum</i>     | 88     | 12     | 0      |
| <i>Hymenophyllum antillense</i>   | 100    | 0      | 0      |
| <i>Hymenophyllum apiculatum</i>   | 83     | 8      | 9      |
| <i>Hymenophyllum applanatum</i>   | 50     | 50     | 0      |
| <i>Hymenophyllum apteryx</i>      | 100    | 0      | 0      |
| <i>Hymenophyllum archboldii</i>   | 100    | 0      | 0      |
| <i>Hymenophyllum armstrongii</i>  | 84     | 4      | 12     |
| <i>Hymenophyllum asplenioides</i> | 83     | 11     | 6      |
| <i>Hymenophyllum assurgens</i>    | 75     | 25     | 0      |
| <i>Hymenophyllum australe</i>     | 47     | 36     | 17     |
| <i>Hymenophyllum axillare</i>     | 82     | 9      | 9      |
| <i>Hymenophyllum badium</i>       | 54     | 43     | 3      |
| <i>Hymenophyllum baileyianum</i>  | 50     | 50     | 0      |
| <i>Hymenophyllum barbatum</i>     | 60     | 30     | 10     |
| <i>Hymenophyllum bivalve</i>      | 64     | 11     | 25     |
| <i>Hymenophyllum blandum</i>      | 80     | 20     | 0      |
| <i>Hymenophyllum bontocense</i>   | 0      | 100    | 0      |
| <i>Hymenophyllum brassii</i>      | 100    | 0      | 0      |
| <i>Hymenophyllum brevifrons</i>   | 100    | 0      | 0      |
| <i>Hymenophyllum brevistipes</i>  | 75     | 0      | 25     |
| <i>Hymenophyllum bryoides</i>     | 100    | 0      | 0      |
| <i>Hymenophyllum bryophilum</i>   | 75     | 25     | 0      |
| <i>Hymenophyllum caespitosum</i>  | 16     | 67     | 17     |
| <i>Hymenophyllum caparaense</i>   | 100    | 0      | 0      |
| <i>Hymenophyllum capense</i>      | 83     | 17     | 0      |
| <i>Hymenophyllum capillare</i>    | 68     | 27     | 5      |
| <i>Hymenophyllum capurroi</i>     | 75     | 25     | 0      |
| <i>Hymenophyllum cardunculus</i>  | 100    | 0      | 0      |

| Species name                          | EV (%) | LV (%) | TV (%) |
|---------------------------------------|--------|--------|--------|
| <i>Hymenophyllum caudiculatum</i>     | 58     | 22     | 20     |
| <i>Hymenophyllum ciliatum</i>         | 44     | 28     | 28     |
| <i>Hymenophyllum cocosense</i>        | 50     | 0      | 50     |
| <i>Hymenophyllum compactum</i>        | 100    | 0      | 0      |
| <i>Hymenophyllum consanguineum</i>    | 100    | 0      | 0      |
| <i>Hymenophyllum copelandii</i>       | 100    | 0      | 0      |
| <i>Hymenophyllum cordobense</i>       | 16     | 67     | 17     |
| <i>Hymenophyllum corrugatum</i>       | 67     | 33     | 0      |
| <i>Hymenophyllum crassipetiolatum</i> | 100    | 0      | 0      |
| <i>Hymenophyllum crispum</i>          | 68     | 14     | 18     |
| <i>Hymenophyllum cristatum</i>        | 100    | 0      | 0      |
| <i>Hymenophyllum cruentum</i>         | 98     | 1      | 1      |
| <i>Hymenophyllum cuneatum</i>         | 100    | 0      | 0      |
| <i>Hymenophyllum cupressiforme</i>    | 62     | 21     | 17     |
| <i>Hymenophyllum darwinii</i>         | 24     | 76     | 0      |
| <i>Hymenophyllum delicatulum</i>      | 12     | 75     | 13     |
| <i>Hymenophyllum deltoideum</i>       | 100    | 0      | 0      |
| <i>Hymenophyllum demissum</i>         | 24     | 0      | 76     |
| <i>Hymenophyllum dentatum</i>         | 34     | 33     | 33     |
| <i>Hymenophyllum denticulatum</i>     | 70     | 27     | 3      |
| <i>Hymenophyllum dependens</i>        | 75     | 25     | 0      |
| <i>Hymenophyllum devolii</i>          | 100    | 0      | 0      |
| <i>Hymenophyllum dicranotrichum</i>   | 100    | 0      | 0      |
| <i>Hymenophyllum digitatum</i>        | 68     | 29     | 3      |
| <i>Hymenophyllum dilatatum</i>        | 98     | 0      | 2      |
| <i>Hymenophyllum ectocarpon</i>       | 90     | 10     | 0      |
| <i>Hymenophyllum edentulum</i>        | 100    | 0      | 0      |
| <i>Hymenophyllum elegans</i>          | 76     | 16     | 8      |
| <i>Hymenophyllum emarginatum</i>      | 100    | 0      | 0      |
| <i>Hymenophyllum exquisitum</i>       | 85     | 15     | 0      |
| <i>Hymenophyllum exsertum</i>         | 79     | 21     | 0      |
| <i>Hymenophyllum falklandicum</i>     | 5      | 72     | 23     |

| Species name                       | EV (%) | LV (%) | TV (%) |
|------------------------------------|--------|--------|--------|
| <i>Hymenophyllum farallonense</i>  | 100    | 0      | 0      |
| <i>Hymenophyllum feejeense</i>     | 100    | 0      | 0      |
| <i>Hymenophyllum fendlerianum</i>  | 82     | 17     | 1      |
| <i>Hymenophyllum ferax</i>         | 100    | 0      | 0      |
| <i>Hymenophyllum ferrugineum</i>   | 61     | 18     | 21     |
| <i>Hymenophyllum fimbriatum</i>    | 100    | 0      | 0      |
| <i>Hymenophyllum firmum</i>        | 100    | 0      | 0      |
| <i>Hymenophyllum flabellatum</i>   | 73     | 24     | 3      |
| <i>Hymenophyllum flexuosum</i>     | 75     | 25     | 0      |
| <i>Hymenophyllum foersteri</i>     | 100    | 0      | 0      |
| <i>Hymenophyllum fragile</i>       | 80     | 14     | 6      |
| <i>Hymenophyllum fuciforme</i>     | 50     | 50     | 0      |
| <i>Hymenophyllum fucoides</i>      | 88     | 9      | 3      |
| <i>Hymenophyllum fujisanense</i>   | 43     | 42     | 15     |
| <i>Hymenophyllum fumarioides</i>   | 78     | 11     | 11     |
| <i>Hymenophyllum gardneri</i>      | 66     | 34     | 0      |
| <i>Hymenophyllum geluense</i>      | 100    | 0      | 0      |
| <i>Hymenophyllum glaziovii</i>     | 50     | 50     | 0      |
| <i>Hymenophyllum gorgoneum</i>     | 100    | 0      | 0      |
| <i>Hymenophyllum hemidimorphum</i> | 100    | 0      | 0      |
| <i>Hymenophyllum hemipteron</i>    | 100    | 0      | 0      |
| <i>Hymenophyllum herzogii</i>      | 0      | 100    | 0      |
| <i>Hymenophyllum hieronymi</i>     | 100    | 0      | 0      |
| <i>Hymenophyllum hirsutum</i>      | 80     | 16     | 4      |
| <i>Hymenophyllum hirtellum</i>     | 100    | 0      | 0      |
| <i>Hymenophyllum holochilum</i>    | 78     | 22     | 0      |
| <i>Hymenophyllum horizontale</i>   | 100    | 0      | 0      |
| <i>Hymenophyllum hosei</i>         | 95     | 0      | 5      |
| <i>Hymenophyllum hygrometricum</i> | 50     | 50     | 0      |
| <i>Hymenophyllum imbricatum</i>    | 100    | 0      | 0      |
| <i>Hymenophyllum inaequale</i>     | 75     | 0      | 25     |
| <i>Hymenophyllum interruptum</i>   | 67     | 25     | 8      |

| Species name                      | EV (%) | LV (%) | TV (%) |
|-----------------------------------|--------|--------|--------|
| <i>Hymenophyllum jamesonii</i>    | 100    | 0      | 0      |
| <i>Hymenophyllum javanicum</i>    | 71     | 17     | 12     |
| <i>Hymenophyllum jimenezii</i>    | 100    | 0      | 0      |
| <i>Hymenophyllum johorenses</i>   | 50     | 50     | 0      |
| <i>Hymenophyllum junghuhnii</i>   | 100    | 0      | 0      |
| <i>Hymenophyllum kaieteurum</i>   | 100    | 0      | 0      |
| <i>Hymenophyllum karstenianum</i> | 67     | 33     | 0      |
| <i>Hymenophyllum krauseanum</i>   | 85     | 0      | 15     |
| <i>Hymenophyllum kuhnii</i>       | 87     | 11     | 2      |
| <i>Hymenophyllum lamellatum</i>   | 100    | 0      | 0      |
| <i>Hymenophyllum laminatum</i>    | 100    | 0      | 0      |
| <i>Hymenophyllum lanatum</i>      | 100    | 0      | 0      |
| <i>Hymenophyllum lanceolatum</i>  | 92     | 4      | 4      |
| <i>Hymenophyllum latifrons</i>    | 100    | 0      | 0      |
| <i>Hymenophyllum latisorum</i>    | 100    | 0      | 0      |
| <i>Hymenophyllum ledermannii</i>  | 100    | 0      | 0      |
| <i>Hymenophyllum lehmannii</i>    | 95     | 5      | 0      |
| <i>Hymenophyllum levingei</i>     | 50     | 50     | 0      |
| <i>Hymenophyllum lindenii</i>     | 75     | 12     | 13     |
| <i>Hymenophyllum lineare</i>      | 88     | 12     | 0      |
| <i>Hymenophyllum lobbii</i>       | 100    | 0      | 0      |
| <i>Hymenophyllum longifolium</i>  | 100    | 0      | 0      |
| <i>Hymenophyllum longissimum</i>  | 50     | 50     | 0      |
| <i>Hymenophyllum lyallii</i>      | 83     | 17     | 0      |
| <i>Hymenophyllum macroglossum</i> | 66     | 34     | 0      |
| <i>Hymenophyllum macrosorum</i>   | 0      | 50     | 50     |
| <i>Hymenophyllum macrothecum</i>  | 100    | 0      | 0      |
| <i>Hymenophyllum maderense</i>    | 0      | 100    | 0      |
| <i>Hymenophyllum malingii</i>     | 50     | 50     | 0      |
| <i>Hymenophyllum marginatum</i>   | 43     | 32     | 25     |
| <i>Hymenophyllum matthewsii</i>   | 95     | 0      | 5      |
| <i>Hymenophyllum maxonii</i>      | 100    | 0      | 0      |

| Species name                         | EV (%) | LV (%) | TV (%) |
|--------------------------------------|--------|--------|--------|
| <i>Hymenophyllum melanosorum</i>     | 100    | 0      | 0      |
| <i>Hymenophyllum microcarpum</i>     | 74     | 15     | 11     |
| <i>Hymenophyllum minimum</i>         | 26     | 61     | 13     |
| <i>Hymenophyllum mirificum</i>       | 50     | 0      | 50     |
| <i>Hymenophyllum molle</i>           | 100    | 0      | 0      |
| <i>Hymenophyllum mortonianum</i>     | 100    | 0      | 0      |
| <i>Hymenophyllum mossambicense</i>   | 12     | 88     | 0      |
| <i>Hymenophyllum multialatum</i>     | 100    | 0      | 0      |
| <i>Hymenophyllum multifidum</i>      | 53     | 8      | 39     |
| <i>Hymenophyllum myriocarpum</i>     | 96     | 4      | 0      |
| <i>Hymenophyllum nahuelhuapiense</i> | 0      | 25     | 75     |
| <i>Hymenophyllum nanostellatum</i>   | 0      | 100    | 0      |
| <i>Hymenophyllum neocaledonicum</i>  | 100    | 0      | 0      |
| <i>Hymenophyllum nephrophyllum</i>   | 42     | 4      | 54     |
| <i>Hymenophyllum nitidulum</i>       | 100    | 0      | 0      |
| <i>Hymenophyllum novoguineense</i>   | 100    | 0      | 0      |
| <i>Hymenophyllum obtusum</i>         | 100    | 0      | 0      |
| <i>Hymenophyllum oligosorum</i>      | 100    | 0      | 0      |
| <i>Hymenophyllum ooides</i>          | 100    | 0      | 0      |
| <i>Hymenophyllum ovatum</i>          | 100    | 0      | 0      |
| <i>Hymenophyllum pachydermicum</i>   | 100    | 0      | 0      |
| <i>Hymenophyllum pallidum</i>        | 68     | 30     | 2      |
| <i>Hymenophyllum palmatifidum</i>    | 100    | 0      | 0      |
| <i>Hymenophyllum paniculiflorum</i>  | 95     | 5      | 0      |
| <i>Hymenophyllum paniense</i>        | 100    | 0      | 0      |
| <i>Hymenophyllum parallelocarpum</i> | 85     | 15     | 0      |
| <i>Hymenophyllum paucicarpum</i>     | 100    | 0      | 0      |
| <i>Hymenophyllum pectinatum</i>      | 15     | 85     | 0      |
| <i>Hymenophyllum peltatum</i>        | 57     | 36     | 7      |
| <i>Hymenophyllum penangianum</i>     | 100    | 0      | 0      |
| <i>Hymenophyllum pilosissimum</i>    | 71     | 29     | 0      |
| <i>Hymenophyllum platylobum</i>      | 100    | 0      | 0      |

| Species name                        | EV (%) | LV (%) | TV (%) |
|-------------------------------------|--------|--------|--------|
| <i>Hymenophyllum plicatum</i>       | 85     | 7      | 8      |
| <i>Hymenophyllum plumieri</i>       | 42     | 0      | 58     |
| <i>Hymenophyllum plumosum</i>       | 87     | 9      | 4      |
| <i>Hymenophyllum pluviatile</i>     | 41     | 17     | 42     |
| <i>Hymenophyllum polyanthos</i>     | 84     | 13     | 3      |
| <i>Hymenophyllum prionema</i>       | 100    | 0      | 0      |
| <i>Hymenophyllum proctoris</i>      | 100    | 0      | 0      |
| <i>Hymenophyllum productum</i>      | 67     | 33     | 0      |
| <i>Hymenophyllum protrusum</i>      | 89     | 11     | 0      |
| <i>Hymenophyllum pulchellum</i>     | 74     | 21     | 5      |
| <i>Hymenophyllum pulcherrimum</i>   | 93     | 7      | 0      |
| <i>Hymenophyllum pumilio</i>        | 100    | 0      | 0      |
| <i>Hymenophyllum pumilum</i>        | 45     | 44     | 11     |
| <i>Hymenophyllum punctisorum</i>    | 0      | 100    | 0      |
| <i>Hymenophyllum pyramidatum</i>    | 90     | 0      | 10     |
| <i>Hymenophyllum quetruhuense</i>   | 0      | 0      | 100    |
| <i>Hymenophyllum rarum</i>          | 71     | 12     | 17     |
| <i>Hymenophyllum recurvum</i>       | 67     | 29     | 4      |
| <i>Hymenophyllum reinwardtii</i>    | 100    | 0      | 0      |
| <i>Hymenophyllum revolutum</i>      | 62     | 38     | 0      |
| <i>Hymenophyllum riukiense</i>      | 100    | 0      | 0      |
| <i>Hymenophyllum roraimense</i>     | 100    | 0      | 0      |
| <i>Hymenophyllum rubellum</i>       | 100    | 0      | 0      |
| <i>Hymenophyllum rufescens</i>      | 62     | 2      | 36     |
| <i>Hymenophyllum rufum</i>          | 80     | 20     | 0      |
| <i>Hymenophyllum rugosum</i>        | 50     | 0      | 50     |
| <i>Hymenophyllum ruizianum</i>      | 74     | 24     | 2      |
| <i>Hymenophyllum saenzianum</i>     | 100    | 0      | 0      |
| <i>Hymenophyllum sampaioanum</i>    | 100    | 0      | 0      |
| <i>Hymenophyllum sanguinolentum</i> | 71     | 16     | 13     |
| <i>Hymenophyllum scabrum</i>        | 71     | 8      | 21     |
| <i>Hymenophyllum secundum</i>       | 50     | 0      | 50     |

| Species name                        | EV (%) | LV (%) | TV (%) |
|-------------------------------------|--------|--------|--------|
| <i>Hymenophyllum semiglabrum</i>    | 100    | 0      | 0      |
| <i>Hymenophyllum senterreanum</i>   | 100    | 0      | 0      |
| <i>Hymenophyllum sericeum</i>       | 94     | 6      | 0      |
| <i>Hymenophyllum serrulatum</i>     | 70     | 30     | 0      |
| <i>Hymenophyllum seselifolium</i>   | 34     | 23     | 43     |
| <i>Hymenophyllum sibthorpioides</i> | 70     | 30     | 0      |
| <i>Hymenophyllum sieberi</i>        | 86     | 14     | 0      |
| <i>Hymenophyllum silveirae</i>      | 33     | 33     | 34     |
| <i>Hymenophyllum simonsianum</i>    | 42     | 41     | 17     |
| <i>Hymenophyllum soriemersum</i>    | 33     | 33     | 34     |
| <i>Hymenophyllum splendidum</i>     | 55     | 45     | 0      |
| <i>Hymenophyllum stenocladum</i>    | 0      | 100    | 0      |
| <i>Hymenophyllum subrigidum</i>     | 86     | 7      | 7      |
| <i>Hymenophyllum talamancanum</i>   | 100    | 0      | 0      |
| <i>Hymenophyllum tarapotense</i>    | 100    | 0      | 0      |
| <i>Hymenophyllum tegularis</i>      | 100    | 0      | 0      |
| <i>Hymenophyllum thuidium</i>       | 100    | 0      | 0      |
| <i>Hymenophyllum tomaniiviense</i>  | 100    | 0      | 0      |
| <i>Hymenophyllum tomentosum</i>     | 100    | 0      | 0      |
| <i>Hymenophyllum tortuosum</i>      | 45     | 36     | 19     |
| <i>Hymenophyllum trapezoidale</i>   | 95     | 0      | 5      |
| <i>Hymenophyllum treubii</i>        | 100    | 0      | 0      |
| <i>Hymenophyllum triangulare</i>    | 99     | 1      | 0      |
| <i>Hymenophyllum trichomanoides</i> | 82     | 0      | 18     |
| <i>Hymenophyllum trichophorum</i>   | 100    | 0      | 0      |
| <i>Hymenophyllum trichophyllum</i>  | 70     | 30     | 0      |
| <i>Hymenophyllum tunbrigense</i>    | 55     | 28     | 17     |
| <i>Hymenophyllum turquinense</i>    | 100    | 0      | 0      |
| <i>Hymenophyllum umbratile</i>      | 75     | 0      | 25     |
| <i>Hymenophyllum undulatum</i>      | 78     | 14     | 8      |
| <i>Hymenophyllum valvatum</i>       | 90     | 10     | 0      |
| <i>Hymenophyllum verecundum</i>     | 85     | 0      | 15     |

| Species name                         | EV (%) | LV (%) | TV (%) |
|--------------------------------------|--------|--------|--------|
| <i>Hymenophyllum veronicoides</i>    | 0      | 100    | 0      |
| <i>Hymenophyllum vestitum</i>        | 44     | 28     | 28     |
| <i>Hymenophyllum villosum</i>        | 45     | 19     | 36     |
| <i>Hymenophyllum walleri</i>         | 50     | 50     | 0      |
| <i>Hymenophyllum whitei</i>          | 50     | 50     | 0      |
| <i>Hymenophyllum wilsonii</i>        | 64     | 33     | 3      |
| <i>Hymenophyllum wrightii</i>        | 44     | 45     | 11     |
| <i>Polyphlebium angustatum</i>       | 72     | 23     | 5      |
| <i>Polyphlebium borbonicum</i>       | 45     | 53     | 2      |
| <i>Polyphlebium capillaceum</i>      | 84     | 6      | 10     |
| <i>Polyphlebium colensoi</i>         | 38     | 0      | 62     |
| <i>Polyphlebium diaphanum</i>        | 78     | 18     | 4      |
| <i>Polyphlebium endlicherianum</i>   | 60     | 30     | 10     |
| <i>Polyphlebium exsectum</i>         | 50     | 50     | 0      |
| <i>Polyphlebium herzogii</i>         | 100    | 0      | 0      |
| <i>Polyphlebium hymenophylloides</i> | 88     | 6      | 6      |
| <i>Polyphlebium pyxidiferum</i>      | 85     | 8      | 7      |
| <i>Polyphlebium venosum</i>          | 98     | 1      | 1      |
| <i>Polyphlebium vieillardii</i>      | 100    | 0      | 0      |
| <i>Polyphlebium wernerii</i>         | 100    | 0      | 0      |
| <i>Trichomanes accedens</i>          | 46     | 14     | 40     |
| <i>Trichomanes alatum</i>            | 33     | 9      | 58     |
| <i>Trichomanes anadromum</i>         | 96     | 0      | 4      |
| <i>Trichomanes ankersii</i>          | 88     | 12     | 0      |
| <i>Trichomanes anomalum</i>          | 11     | 28     | 61     |
| <i>Trichomanes arbuscula</i>         | 20     | 30     | 50     |
| <i>Trichomanes bancroftii</i>        | 0      | 25     | 75     |
| <i>Trichomanes bicornis</i>          | 16     | 27     | 57     |
| <i>Trichomanes bissei</i>            | 0      | 0      | 100    |
| <i>Trichomanes boivinii</i>          | 0      | 50     | 50     |
| <i>Trichomanes botryoides</i>        | 17     | 16     | 67     |
| <i>Trichomanes caliginum</i>         | 0      | 63     | 37     |

| Species name                       | EV (%) | LV (%) | TV (%) |
|------------------------------------|--------|--------|--------|
| <i>Trichomanes crinitum</i>        | 48     | 22     | 30     |
| <i>Trichomanes crispiforme</i>     | 67     | 0      | 33     |
| <i>Trichomanes crispum</i>         | 51     | 18     | 31     |
| <i>Trichomanes cristatum</i>       | 25     | 7      | 68     |
| <i>Trichomanes cupressoides</i>    | 10     | 50     | 40     |
| <i>Trichomanes dactylites</i>      | 50     | 5      | 45     |
| <i>Trichomanes delicatum</i>       | 100    | 0      | 0      |
| <i>Trichomanes diversifrons</i>    | 9      | 0      | 91     |
| <i>Trichomanes egleri</i>          | 16     | 47     | 37     |
| <i>Trichomanes elegans</i>         | 3      | 13     | 84     |
| <i>Trichomanes galeottii</i>       | 70     | 0      | 30     |
| <i>Trichomanes guidoi</i>          | 17     | 16     | 67     |
| <i>Trichomanes holopterum</i>      | 67     | 0      | 33     |
| <i>Trichomanes hostmannianum</i>   | 13     | 6      | 81     |
| <i>Trichomanes humboldtii</i>      | 7      | 7      | 86     |
| <i>Trichomanes jenmanii</i>        | 0      | 0      | 100    |
| <i>Trichomanes kalbreyeri</i>      | 100    | 0      | 0      |
| <i>Trichomanes lucens</i>          | 59     | 8      | 33     |
| <i>Trichomanes ludovicianum</i>    | 70     | 10     | 20     |
| <i>Trichomanes macilentum</i>      | 12     | 21     | 67     |
| <i>Trichomanes madagascariense</i> | 0      | 0      | 100    |
| <i>Trichomanes martiusii</i>       | 27     | 0      | 73     |
| <i>Trichomanes micayense</i>       | 100    | 0      | 0      |
| <i>Trichomanes mougeotii</i>       | 0      | 17     | 83     |
| <i>Trichomanes murilloanum</i>     | 0      | 100    | 0      |
| <i>Trichomanes osmundoides</i>     | 0      | 6      | 94     |
| <i>Trichomanes pedicellatum</i>    | 88     | 12     | 0      |
| <i>Trichomanes pellucens</i>       | 17     | 11     | 72     |
| <i>Trichomanes pilosum</i>         | 18     | 28     | 54     |
| <i>Trichomanes pinnatum</i>        | 0      | 4      | 96     |
| <i>Trichomanes plumosum</i>        | 40     | 5      | 55     |
| <i>Trichomanes polypodioides</i>   | 89     | 5      | 6      |

| Species name                        | EV (%) | LV (%) | TV (%) |
|-------------------------------------|--------|--------|--------|
| <i>Trichomanes resinosum</i>        | 0      | 50     | 50     |
| <i>Trichomanes ribae</i>            | 100    | 0      | 0      |
| <i>Trichomanes robustum</i>         | 50     | 0      | 50     |
| <i>Trichomanes roraimense</i>       | 33     | 33     | 34     |
| <i>Trichomanes scandens</i>         | 50     | 0      | 50     |
| <i>Trichomanes sellowianum</i>      | 100    | 0      | 0      |
| <i>Trichomanes spruceanum</i>       | 0      | 0      | 100    |
| <i>Trichomanes steyermarkii</i>     | 50     | 38     | 12     |
| <i>Trichomanes sublabiatum</i>      | 50     | 50     | 0      |
| <i>Trichomanes superbum</i>         | 33     | 0      | 67     |
| <i>Trichomanes tanaicum</i>         | 75     | 25     | 0      |
| <i>Trichomanes trigonum</i>         | 0      | 10     | 90     |
| <i>Trichomanes trollii</i>          | 1      | 17     | 82     |
| <i>Trichomanes tuerckheimii</i>     | 88     | 12     | 0      |
| <i>Trichomanes vandenboschii</i>    | 7      | 69     | 24     |
| <i>Trichomanes vaupesensis</i>      | 0      | 100    | 0      |
| <i>Trichomanes vittaria</i>         | 0      | 1      | 99     |
| <i>Vandenboschia auriculata</i>     | 60     | 20     | 20     |
| <i>Vandenboschia birmanica</i>      | 38     | 50     | 12     |
| <i>Vandenboschia boschiana</i>      | 50     | 0      | 50     |
| <i>Vandenboschia collariata</i>     | 84     | 11     | 5      |
| <i>Vandenboschia cyrtotheca</i>     | 67     | 0      | 33     |
| <i>Vandenboschia cystoseiroides</i> | 50     | 50     | 0      |
| <i>Vandenboschia davallioides</i>   | 83     | 17     | 0      |
| <i>Vandenboschia fargesii</i>       | 50     | 50     | 0      |
| <i>Vandenboschia gigantea</i>       | 67     | 0      | 33     |
| <i>Vandenboschia johnstonensis</i>  | 100    | 0      | 0      |
| <i>Vandenboschia kalamocarpa</i>    | 50     | 50     | 0      |
| <i>Vandenboschia lofoushanensis</i> | 0      | 100    | 0      |
| <i>Vandenboschia maxima</i>         | 35     | 38     | 27     |
| <i>Vandenboschia radicans</i>       | 76     | 15     | 9      |
| <i>Vandenboschia rupestris</i>      | 73     | 23     | 4      |

| Species name                      | EV (%) | LV (%) | TV (%) |
|-----------------------------------|--------|--------|--------|
| <i>Vandenboschia speciosa</i>     | 27     | 64     | 9      |
| <i>Vandenboschia striata</i>      | 50     | 50     | 0      |
| <i>Vandenboschia subclathrata</i> | 0      | 100    | 0      |
| <i>Vandenboschia tubiflora</i>    | 50     | 0      | 50     |
